# Supplementary material for: Based on Integrated Bioinformatics Analysis Identification of Biomarkers in Hepatocellular Carcinoma Patients from Different Regions
Source: Biomed Res Int. 2019 Oct 28;2019:1742341. doi: 10.1155/2019/1742341 (PMC6925735; doi:10.1155/2019/1742341)
Supplement: Supplementary Materials — Supplementary Table S1: information for the DEGs. Supplementary Table S2: enrichment analysis of the DEGs. Supplementary Table S3: node information for PPI network. Supplementary Table S4: pathway analysis of network modules. Supplementary Table S5: univariate Cox regression analysis of the prognosis of the top 20 genes in PPI. [file 1742341.f1.zip]

Archive with 5 entries (5 files):
- 1742341.f1/Supplementary Table S1.xlsx
- 1742341.f1/Supplementary Table S2.xlsx
- 1742341.f1/Supplementary Table S3.xlsx
- 1742341.f1/Supplementary Table S4.xlsx
- 1742341.f1/Supplementary Table S5.xlsx
