# Supplementary material for: Based on Integrated Bioinformatics Analysis Identification of Biomarkers in Hepatocellular Carcinoma Patients from Different Regions
Source: Biomed Res Int. 2019 Oct 28;2019:1742341. doi: 10.1155/2019/1742341 (PMC6925735; doi:10.1155/2019/1742341)
Supplement: Supplementary Materials — Supplementary Table S1: information for the DEGs. Supplementary Table S2: enrichment analysis of the DEGs. Supplementary Table S3: node information for PPI network. Supplementary Table S4: pathway analysis of network modules. Supplementary Table S5: univariate Cox regression analysis of the prognosis of the top 20 genes in PPI. [file 1742341.f1.zip › 1742341.f1/Supplementary Table S1.xlsx]

## Sheet: rra_sig_result
Supplementary Table S1 imformation for the DEGs
Gene	logFC	Pvalue	adj.Pvalue	Category
SPINK1	4.75987	1.10082e-23	1.90662e-20	Up-regulated gene
GPC3	5.19525	2.25416e-17	3.9042e-14	Up-regulated gene
AKR1B10	3.72673	6.27176e-16	1.08627e-12	Up-regulated gene
AURKA	1.74679	3.32653e-13	5.76156e-10	Up-regulated gene
CDKN3	2.04923	3.56297e-13	6.17106e-10	Up-regulated gene
SQLE	1.94242	1.0517e-12	1.82155e-09	Up-regulated gene
TOP2A	2.15969	1.10952e-12	1.92169e-09	Up-regulated gene
NCAPG	1.74166	3.88599e-12	6.73054e-09	Up-regulated gene
ASPM	1.80181	1.17924e-11	2.04244e-08	Up-regulated gene
S100P	1.98719	3.75536e-11	6.50428e-08	Up-regulated gene
PTTG1	1.97064	4.89137e-11	8.47186e-08	Up-regulated gene
LCN2	1.82902	5.24046e-11	9.07647e-08	Up-regulated gene
PRC1	2.05633	5.50932e-11	9.54214e-08	Up-regulated gene
NUSAP1	1.94327	6.52117e-11	1.12947e-07	Up-regulated gene
CAP2	2.07318	6.93233e-11	1.20068e-07	Up-regulated gene
ANLN	1.74315	8.50989e-10	1.47391e-06	Up-regulated gene
UBE2T	1.7936	1.03289e-09	1.78897e-06	Up-regulated gene
DLGAP5	1.62588	1.24682e-09	2.1595e-06	Up-regulated gene
UBE2C	1.7189	1.35945e-09	2.35456e-06	Up-regulated gene
COL15A1	1.9172	1.42394e-09	2.46627e-06	Up-regulated gene
SPP1	1.80594	1.75659e-09	3.04241e-06	Up-regulated gene
CCL20	1.92769	2.3412e-09	4.05496e-06	Up-regulated gene
KIF20A	1.58942	2.5485e-09	4.41399e-06	Up-regulated gene
ROBO1	2.24934	2.75228e-09	4.76694e-06	Up-regulated gene
MDK	1.8763	7.36164e-09	1.27504e-05	Up-regulated gene
MELK	1.51583	9.56724e-09	1.65705e-05	Up-regulated gene
IGF2BP3	1.42096	1.07348e-08	1.85927e-05	Up-regulated gene
NUF2	1.49784	1.24242e-08	2.15187e-05	Up-regulated gene
GMNN	1.73798	2.78265e-08	4.81955e-05	Up-regulated gene
RRAGD	1.41401	2.92099e-08	5.05916e-05	Up-regulated gene
FOXM1	1.40502	1.30653e-07	0.000226291	Up-regulated gene
CDC20	1.75074	1.43434e-07	0.000248428	Up-regulated gene
TPX2	1.42084	1.47136e-07	0.00025484	Up-regulated gene
DTL	1.55838	1.47738e-07	0.000255883	Up-regulated gene
RRM2	2.01418	1.78777e-07	0.000309641	Up-regulated gene
MUC13	1.43486	1.85177e-07	0.000320727	Up-regulated gene
RBM24	1.31105	2.18913e-07	0.000379157	Up-regulated gene
CDC6	1.17452	2.9724e-07	0.00051482	Up-regulated gene
KIF4A	1.55993	3.18065e-07	0.000550889	Up-regulated gene
SRXN1	1.48894	3.18528e-07	0.00055169	Up-regulated gene
TTK	1.70574	3.48998e-07	0.000604464	Up-regulated gene
BUB1B	1.3776	3.66164e-07	0.000634196	Up-regulated gene
CCNA2	1.26975	3.85118e-07	0.000667025	Up-regulated gene
DKK1	1.2575	4.04797e-07	0.000701109	Up-regulated gene
CCNB2	1.24507	5.86734e-07	0.00101622	Up-regulated gene
RFC4	1.53847	7.3606e-07	0.00127486	Up-regulated gene
CDCA5	1.27879	8.13813e-07	0.00140952	Up-regulated gene
NQO1	1.91714	8.51065e-07	0.00147404	Up-regulated gene
SMYD3	1.26078	9.26257e-07	0.00160428	Up-regulated gene
LAMC1	1.33908	1.17369e-06	0.00203282	Up-regulated gene
FLVCR1	1.32338	1.79551e-06	0.00310983	Up-regulated gene
COX7B2	1.52865	2.0632e-06	0.00357347	Up-regulated gene
REG3A	1.7612	2.23358e-06	0.00386856	Up-regulated gene
CCNE2	1.09572	2.29925e-06	0.0039823	Up-regulated gene
MKI67	1.09868	2.91154e-06	0.00504279	Up-regulated gene
CENPF	1.18648	3.4174e-06	0.00591894	Up-regulated gene
FAM83D	1.59576	3.4214e-06	0.00592587	Up-regulated gene
FDPS	2.09162	3.98622e-06	0.00690413	Up-regulated gene
PBK	1.67782	4.34751e-06	0.00752989	Up-regulated gene
CCNB1	1.61291	4.97597e-06	0.00861837	Up-regulated gene
TOMM40L	1.58529	5.77855e-06	0.0100084	Up-regulated gene
MCM2	1.3451	5.83213e-06	0.0101013	Up-regulated gene
MCM3	1.21863	6.5607e-06	0.0113631	Up-regulated gene
COL4A1	1.60466	7.46218e-06	0.0129245	Up-regulated gene
TUFT1	1.27957	1.01833e-05	0.0176374	Up-regulated gene
AFP	1.82728	1.02809e-05	0.0178065	Up-regulated gene
SULT1C2	1.36899	1.03049e-05	0.017848	Up-regulated gene
HMMR	1.6223	1.03982e-05	0.0180097	Up-regulated gene
SCAMP3	1.2739	1.12174e-05	0.0194286	Up-regulated gene
CLGN	1.2782	1.15074e-05	0.0199309	Up-regulated gene
NEK2	1.29377	1.39198e-05	0.0241091	Up-regulated gene
ILF2	1.26654	1.39303e-05	0.0241272	Up-regulated gene
RACGAP1	1.70506	1.55285e-05	0.0268954	Up-regulated gene
E2F8	1.11157	1.82237e-05	0.0315635	Up-regulated gene
IGF2BP2	1.28517	1.96112e-05	0.0339666	Up-regulated gene
PAGE4	1.44221	2.11871e-05	0.036696	Up-regulated gene
CLIC1	1.16467	2.33044e-05	0.0403633	Up-regulated gene
TBCE	1.08508	2.40952e-05	0.0417329	Up-regulated gene
ACSL4	1.77462	2.5029e-05	0.0433502	Up-regulated gene
GNPAT	1.20082	2.70713e-05	0.0468876	Up-regulated gene
NDC80	1.62629	2.71827e-05	0.0470805	Up-regulated gene
FCN3	-4.81722	5.136e-19	7.58587e-16	Down-regulated gene
CLEC1B	-4.17222	5.31346e-17	7.84798e-14	Down-regulated gene
SLC22A1	-4.27048	2.34928e-15	3.46989e-12	Down-regulated gene
CYP1A2	-4.99356	2.8138e-15	4.15598e-12	Down-regulated gene
HAMP	-5.99702	7.47317e-15	1.10379e-11	Down-regulated gene
C9	-4.22139	1.247e-14	1.84183e-11	Down-regulated gene
SLCO1B3	-3.18559	4.59247e-14	6.78308e-11	Down-regulated gene
RDH16	-3.0791	1.42042e-13	2.09795e-10	Down-regulated gene
SPP2	-2.81273	1.77762e-13	2.62554e-10	Down-regulated gene
DNASE1L3	-2.73822	2.11511e-13	3.12401e-10	Down-regulated gene
GBA3	-2.91197	2.86135e-13	4.22622e-10	Down-regulated gene
OIT3	-3.39717	3.02424e-13	4.46681e-10	Down-regulated gene
AFM	-3.38501	5.82339e-13	8.60114e-10	Down-regulated gene
CNDP1	-3.0525	7.21705e-13	1.06596e-09	Down-regulated gene
MBL2	-3.23645	9.76162e-13	1.44179e-09	Down-regulated gene
BHMT	-2.36853	1.08836e-12	1.6075e-09	Down-regulated gene
PCK1	-2.783	1.64901e-12	2.43558e-09	Down-regulated gene
HAO2	-2.68697	1.80762e-12	2.66986e-09	Down-regulated gene
APOF	-3.43407	2.29921e-12	3.39593e-09	Down-regulated gene
CYP8B1	-2.77262	2.94154e-12	4.34466e-09	Down-regulated gene
CLRN3	-2.42127	3.51278e-12	5.18837e-09	Down-regulated gene
F9	-3.34667	5.30991e-12	7.84273e-09	Down-regulated gene
FBP1	-3.78738	5.65054e-12	8.34585e-09	Down-regulated gene
APOA5	-2.6433	6.24512e-12	9.22405e-09	Down-regulated gene
MT1F	-4.38193	9.3535e-12	1.38151e-08	Down-regulated gene
CYP2C8	-2.80472	1.38675e-11	2.04823e-08	Down-regulated gene
CYP4A11	-3.49809	2.12898e-11	3.14451e-08	Down-regulated gene
DCN	-3.49153	2.30472e-11	3.40407e-08	Down-regulated gene
C7	-2.44505	2.40867e-11	3.55761e-08	Down-regulated gene
PROZ	-1.75275	2.48056e-11	3.66379e-08	Down-regulated gene
TMEM27	-2.36499	2.56706e-11	3.79155e-08	Down-regulated gene
CRHBP	-3.16289	3.41397e-11	5.04243e-08	Down-regulated gene
GLS2	-2.23579	4.15747e-11	6.14058e-08	Down-regulated gene
MT1M	-3.56469	4.29233e-11	6.33977e-08	Down-regulated gene
NAT2	-2.57559	5.50932e-11	8.13727e-08	Down-regulated gene
CLEC4G	-2.56224	5.75817e-11	8.50482e-08	Down-regulated gene
ALDH8A1	-2.39871	6.70634e-11	9.90526e-08	Down-regulated gene
GNMT	-2.48896	6.98573e-11	1.03179e-07	Down-regulated gene
SRD5A2	-1.9185	7.66142e-11	1.13159e-07	Down-regulated gene
CYP2E1	-4.37437	8.18112e-11	1.20835e-07	Down-regulated gene
ADH4	-2.2886	8.836e-11	1.30508e-07	Down-regulated gene
AKR1D1	-2.0425	1.04647e-10	1.54564e-07	Down-regulated gene
CYP3A4	-2.93362	1.10617e-10	1.63381e-07	Down-regulated gene
TDO2	-2.33417	1.11692e-10	1.6497e-07	Down-regulated gene
KLKB1	-2.66778	1.5526e-10	2.29319e-07	Down-regulated gene
KMO	-2.13609	1.85036e-10	2.73298e-07	Down-regulated gene
VIPR1	-1.81152	2.02692e-10	2.99377e-07	Down-regulated gene
MARCO	-2.53098	2.08883e-10	3.0852e-07	Down-regulated gene
SLC38A4	-1.66541	2.26906e-10	3.3514e-07	Down-regulated gene
CYP39A1	-1.89862	2.28495e-10	3.37487e-07	Down-regulated gene
FETUB	-1.83601	2.43112e-10	3.59076e-07	Down-regulated gene
CETP	-1.81977	3.32802e-10	4.91548e-07	Down-regulated gene
CXCL12	-2.81472	3.93637e-10	5.81401e-07	Down-regulated gene
CD5L	-2.4855	4.19029e-10	6.18906e-07	Down-regulated gene
HGFAC	-2.20076	5.51473e-10	8.14526e-07	Down-regulated gene
LYVE1	-2.31903	5.55577e-10	8.20588e-07	Down-regulated gene
ECM1	-2.28977	5.61888e-10	8.29908e-07	Down-regulated gene
GPR128	-1.69468	5.74939e-10	8.49185e-07	Down-regulated gene
PZP	-1.77306	5.77834e-10	8.53461e-07	Down-regulated gene
MT1G	-4.58997	6.42461e-10	9.48915e-07	Down-regulated gene
BBOX1	-1.85449	8.06133e-10	1.19066e-06	Down-regulated gene
LY6E	-1.88614	9.44133e-10	1.39448e-06	Down-regulated gene
THRSP	-2.22822	1.52618e-09	2.25417e-06	Down-regulated gene
MT1X	-4.43562	1.67269e-09	2.47056e-06	Down-regulated gene
LECT2	-2.78048	2.40222e-09	3.54808e-06	Down-regulated gene
GHR	-1.97938	3.13503e-09	4.63044e-06	Down-regulated gene
PLAC8	-2.25384	3.39983e-09	5.02155e-06	Down-regulated gene
CLEC4M	-2.29965	3.46617e-09	5.11954e-06	Down-regulated gene
CPS1	-2.0832	4.25883e-09	6.2903e-06	Down-regulated gene
BCHE	-2.17688	4.3431e-09	6.41476e-06	Down-regulated gene
SHBG	-1.63722	5.96148e-09	8.8051e-06	Down-regulated gene
LCAT	-1.67095	6.6846e-09	9.87315e-06	Down-regulated gene
BCO2	-2.29888	6.85461e-09	1.01243e-05	Down-regulated gene
CXCL14	-2.41138	8.20647e-09	1.2121e-05	Down-regulated gene
IDO2	-1.90457	1.03458e-08	1.52807e-05	Down-regulated gene
ASS1	-3.06217	1.11092e-08	1.64083e-05	Down-regulated gene
TMEM45A	-1.76713	1.18796e-08	1.75461e-05	Down-regulated gene
FOS	-2.82951	1.5062e-08	2.22465e-05	Down-regulated gene
FXYD1	-1.72288	1.80076e-08	2.65973e-05	Down-regulated gene
SLC10A1	-2.60337	1.97239e-08	2.91323e-05	Down-regulated gene
SDS	-2.26222	2.27971e-08	3.36714e-05	Down-regulated gene
HPD	-3.42056	2.8434e-08	4.1997e-05	Down-regulated gene
ADH6	-1.6463	3.29985e-08	4.87388e-05	Down-regulated gene
C8orf4	-2.20719	4.22716e-08	6.24351e-05	Down-regulated gene
C6	-2.84348	4.39675e-08	6.494e-05	Down-regulated gene
STEAP4	-1.61294	5.23764e-08	7.736e-05	Down-regulated gene
SRPX	-1.87114	5.52373e-08	8.15855e-05	Down-regulated gene
HSD11B1	-2.71176	5.73075e-08	8.46432e-05	Down-regulated gene
OTC	-1.56951	6.21874e-08	9.18507e-05	Down-regulated gene
INMT	-1.95062	6.29989e-08	9.30493e-05	Down-regulated gene
RND3	-2.39596	7.60311e-08	0.000112298	Down-regulated gene
C8A	-2.88724	7.62748e-08	0.000112658	Down-regulated gene
NPY1R	-1.60531	1.05473e-07	0.000155783	Down-regulated gene
GYS2	-2.11268	1.17206e-07	0.000173113	Down-regulated gene
PLG	-2.31071	1.1931e-07	0.00017622	Down-regulated gene
VNN1	-2.03214	1.25437e-07	0.00018527	Down-regulated gene
ACOT12	-1.53507	1.27007e-07	0.000187589	Down-regulated gene
LIFR	-1.62095	1.30615e-07	0.000192918	Down-regulated gene
EGR1	-2.91649	1.55603e-07	0.000229826	Down-regulated gene
ANXA10	-1.98009	1.63785e-07	0.00024191	Down-regulated gene
CYP2C9	-1.92153	1.67276e-07	0.000247067	Down-regulated gene
FCN2	-2.65351	2.04903e-07	0.000302642	Down-regulated gene
AGXT2	-1.54145	2.4193e-07	0.00035733	Down-regulated gene
GLYAT	-1.91772	3.01408e-07	0.000445179	Down-regulated gene
SLC27A2	-1.8884	3.29699e-07	0.000486965	Down-regulated gene
SLC13A5	-1.77876	3.38463e-07	0.00049991	Down-regulated gene
TAT	-2.84191	3.53661e-07	0.000522358	Down-regulated gene
IGFALS	-1.75639	3.70345e-07	0.000546999	Down-regulated gene
CA2	-2.02173	3.78904e-07	0.000559641	Down-regulated gene
OLFML3	-1.30905	3.96866e-07	0.000586172	Down-regulated gene
PGLYRP2	-1.52865	4.35715e-07	0.000643551	Down-regulated gene
OGDHL	-1.39366	4.43033e-07	0.00065436	Down-regulated gene
ADH1A	-2.52321	5.04183e-07	0.000744679	Down-regulated gene
EPHX2	-1.93223	5.95282e-07	0.000879232	Down-regulated gene
C8B	-2.41513	5.95282e-07	0.000879232	Down-regulated gene
IGJ	-1.8888	6.66167e-07	0.000983929	Down-regulated gene
CYP26A1	-1.75034	6.98135e-07	0.00103115	Down-regulated gene
ADRA1A	-1.21623	7.82748e-07	0.00115612	Down-regulated gene
AZGP1	-2.50751	7.98626e-07	0.00117957	Down-regulated gene
MAT1A	-1.87261	8.60673e-07	0.00127121	Down-regulated gene
IL13RA2	-1.37396	9.60416e-07	0.00141853	Down-regulated gene
PHGDH	-1.65347	9.92445e-07	0.00146584	Down-regulated gene
AOX1	-1.90744	1.08744e-06	0.00160614	Down-regulated gene
PON1	-1.74366	1.10656e-06	0.00163438	Down-regulated gene
ACSM3	-1.63201	1.2974e-06	0.00191626	Down-regulated gene
LPA	-1.90455	1.30036e-06	0.00192063	Down-regulated gene
COLEC10	-1.57025	1.35616e-06	0.00200305	Down-regulated gene
GPM6A	-1.18585	1.56932e-06	0.00231789	Down-regulated gene
SOCS2	-1.65269	1.60917e-06	0.00237674	Down-regulated gene
CYR61	-1.46195	1.64565e-06	0.00243062	Down-regulated gene
KBTBD11	-1.42066	1.68697e-06	0.00249165	Down-regulated gene
HPX	-2.64195	1.97902e-06	0.00292301	Down-regulated gene
GSTZ1	-2.10648	2.01903e-06	0.00298211	Down-regulated gene
MT1E	-1.59595	2.0632e-06	0.00304735	Down-regulated gene
AADAT	-1.41865	2.26272e-06	0.00334204	Down-regulated gene
HRG	-2.16223	2.36046e-06	0.0034864	Down-regulated gene
UROC1	-1.30871	2.51409e-06	0.00371332	Down-regulated gene
HAO1	-1.90327	2.64361e-06	0.00390461	Down-regulated gene
FTCD	-1.88885	2.87207e-06	0.00424205	Down-regulated gene
HSD17B6	-1.93145	2.95141e-06	0.00435923	Down-regulated gene
ACSL1	-1.71461	3.03237e-06	0.00447881	Down-regulated gene
APOA1	-1.94665	3.98957e-06	0.0058926	Down-regulated gene
SULT2A1	-1.80032	4.2742e-06	0.00631299	Down-regulated gene
HHIP	-1.10708	4.34906e-06	0.00642357	Down-regulated gene
CYP2J2	-1.49854	4.67923e-06	0.00691122	Down-regulated gene
OAT	-1.7935	4.69783e-06	0.00693869	Down-regulated gene
LUM	-1.33525	4.73603e-06	0.00699511	Down-regulated gene
TIMD4	-1.27883	4.79334e-06	0.00707976	Down-regulated gene
ACAA1	-1.7684	4.96837e-06	0.00733829	Down-regulated gene
DPT	-1.9541	5.02777e-06	0.00742601	Down-regulated gene
CRP	-2.69228	5.3518e-06	0.00790462	Down-regulated gene
CTH	-2.04444	5.42589e-06	0.00801404	Down-regulated gene
AMDHD1	-1.67482	5.58647e-06	0.00825122	Down-regulated gene
MOGAT2	-1.0495	5.78261e-06	0.00854092	Down-regulated gene
HRSP12	-1.90987	6.26025e-06	0.00924639	Down-regulated gene
STAB2	-1.47179	6.49514e-06	0.00959333	Down-regulated gene
NNMT	-3.87406	6.76675e-06	0.00999449	Down-regulated gene
COLEC11	-1.6804	7.13114e-06	0.0105327	Down-regulated gene
SLC39A5	-1.20301	7.23758e-06	0.0106899	Down-regulated gene
FMO3	-1.49443	7.28631e-06	0.0107619	Down-regulated gene
AGXT	-1.78224	8.20962e-06	0.0121256	Down-regulated gene
CFI	-1.70284	8.38303e-06	0.0123817	Down-regulated gene
WDR72	-1.04281	9.29143e-06	0.0137234	Down-regulated gene
PBLD	-1.55213	9.94334e-06	0.0146863	Down-regulated gene
IGF1	-1.55874	1.09291e-05	0.0161423	Down-regulated gene
FABP1	-2.63249	1.15467e-05	0.0170545	Down-regulated gene
AQP9	-1.5509	1.35513e-05	0.0200152	Down-regulated gene
DCXR	-1.7622	1.38031e-05	0.0203871	Down-regulated gene
HMGCS2	-1.68523	1.38164e-05	0.0204069	Down-regulated gene
ALDOB	-2.1504	1.43171e-05	0.0211464	Down-regulated gene
ASPG	-1.13142	1.44479e-05	0.0213395	Down-regulated gene
AKR7A3	-1.35915	1.44832e-05	0.0213916	Down-regulated gene
FOSB	-1.66636	1.59756e-05	0.023596	Down-regulated gene
RSPO3	-1.45775	1.59756e-05	0.023596	Down-regulated gene
SLC27A5	-1.84683	1.71048e-05	0.0252638	Down-regulated gene
RCL1	-1.21523	1.84832e-05	0.0272996	Down-regulated gene
PDK4	-1.83879	2.011e-05	0.0297025	Down-regulated gene
CYP2C19	-1.67219	2.2121e-05	0.0326727	Down-regulated gene
DPYS	-1.33542	2.31879e-05	0.0342486	Down-regulated gene
ABCA8	-1.20475	2.38715e-05	0.0352582	Down-regulated gene
APCS	-1.88011	2.45504e-05	0.0362609	Down-regulated gene
GCGR	-1.20392	2.54339e-05	0.0375659	Down-regulated gene
ENO3	-1.56424	2.58362e-05	0.03816	Down-regulated gene
G6PC	-1.34118	2.77052e-05	0.0409205	Down-regulated gene
CCDC3	-1.12529	2.9898e-05	0.0441594	Down-regulated gene
