# Supplementary material for: Based on Integrated Bioinformatics Analysis Identification of Biomarkers in Hepatocellular Carcinoma Patients from Different Regions
Source: Biomed Res Int. 2019 Oct 28;2019:1742341. doi: 10.1155/2019/1742341 (PMC6925735; doi:10.1155/2019/1742341)
Supplement: Supplementary Materials — Supplementary Table S1: information for the DEGs. Supplementary Table S2: enrichment analysis of the DEGs. Supplementary Table S3: node information for PPI network. Supplementary Table S4: pathway analysis of network modules. Supplementary Table S5: univariate Cox regression analysis of the prognosis of the top 20 genes in PPI. [file 1742341.f1.zip › 1742341.f1/Supplementary Table S2.xlsx]

## Sheet: Sheet1
Supplementary Table S2 enrichmet analysis of the DEGs
Group	Category	Term	No. of genes in the dataset	No.of genes in the background dataset	Percentage of genes	Fold enrichment	P-value (Hypergeometric test)	Bonferroni method	BH method	Q-value (Storey-Tibshirani method)	Gene name
Up-regulated genes	Molecular function	Molecular function unknown	8	5685	9.87654	0.31524	0.999999	1	1	1	GPC3; ASPM; CAP2; DTL; SRXN1; CDCA5; FAM83D; TOMM40L;
Up-regulated genes	Molecular function	Protease inhibitor activity	1	94	1.23457	2.40374	0.344338	1	1	1	SPINK1;
Up-regulated genes	Molecular function	Acyltransferase activity	1	80	1.23457	2.82434	0.301698	1	1	1	GNPAT;
Up-regulated genes	Molecular function	Cell adhesion molecule activity	2	356	2.46914	1.2632	0.47446	1	1	1	SPP1; ROBO1;
Up-regulated genes	Molecular function	Ligase activity	1	112	1.23457	2.01746	0.395402	1	1	1	ACSL4;
Up-regulated genes	Molecular function	Transporter activity	3	576	3.7037	1.16917	0.477707	1	1	1	LCN2; FLVCR1; AFP;
Up-regulated genes	Molecular function	Translation regulator activity	2	101	2.46914	4.45217	0.0750315	1	1	1	IGF2BP3; IGF2BP2;
Up-regulated genes	Molecular function	Catalytic activity	3	532	3.7037	1.26586	0.426075	1	1	1	AKR1B10; SQLE; COX7B2;
Up-regulated genes	Molecular function	Transferase activity	1	156	1.23457	1.44847	0.504274	1	1	1	FDPS;
Up-regulated genes	Molecular function	GTPase activator activity	1	144	1.23457	1.56916	0.476667	1	1	1	RACGAP1;
Up-regulated genes	Molecular function	Oxidoreductase activity	2	161	2.46914	2.79308	0.161941	1	1	1	RRM2; NQO1;
Up-regulated genes	Molecular function	Receptor binding	1	129	1.23457	1.75161	0.440014	1	1	1	DKK1;
Up-regulated genes	Molecular function	Structural molecule activity	1	269	1.23457	0.840026	0.702952	1	1	1	ANLN;
Up-regulated genes	Molecular function	Chromatin binding	1	13	1.23457	17.3694	0.0565822	1	1	1	NDC80;
Up-regulated genes	Molecular function	Cytoskeletal protein binding	2	218	2.46914	2.06281	0.25467	1	1	1	PRC1; NUF2;
Up-regulated genes	Molecular function	Protein serine/threonine kinase activity	5	301	6.17284	3.72389	0.0112159	1	0.628091	1	AURKA; MELK; BUB1B; PBK; NEK2;
Up-regulated genes	Molecular function	Transcription regulator activity	2	832	2.46914	0.540514	0.891664	1	1	1	PTTG1; E2F8;
Up-regulated genes	Molecular function	Extracellular matrix structural constituent	4	166	4.93827	5.40443	0.00653382	1	0.487858	1	COL15A1; LAMC1; COL4A1; TUFT1;
Up-regulated genes	Molecular function	Receptor activity	1	361	1.23457	0.625953	0.804701	1	1	1	HMMR;
Up-regulated genes	Molecular function	Transcription factor activity	2	842	2.46914	0.534095	0.895596	1	1	1	FOXM1; ILF2;
Up-regulated genes	Molecular function	Calcium ion binding	1	185	1.23457	1.22142	0.565194	1	1	1	S100P;
Up-regulated genes	Molecular function	Ubiquitin-specific protease activity	2	377	2.46914	1.19284	0.504739	1	1	1	UBE2T; UBE2C;
Up-regulated genes	Molecular function	Growth factor activity	1	110	1.23457	2.05413	0.389928	1	1	1	REG3A;
Up-regulated genes	Molecular function	ATP binding	1	6	1.23457	37.5999	0.0265196	1	0.848628	1	TPX2;
Up-regulated genes	Molecular function	Protein binding	5	182	6.17284	6.1586	0.00133656	0.29939	0.254557	1	GMNN; CDC20; MUC13; CCNB2; MKI67;
Up-regulated genes	Molecular function	RNA binding	2	366	2.46914	1.22869	0.489015	1	1	1	RBM24; IGF2BP2;
Up-regulated genes	Molecular function	GTPase activity	1	222	1.23457	1.01786	0.63229	1	1	1	RRAGD;
Up-regulated genes	Molecular function	Methyltransferase activity	1	59	1.23457	3.82944	0.232552	1	1	1	SMYD3;
Up-regulated genes	Molecular function	DNA binding	6	654	7.40741	2.05603	0.0722261	1	1	1	NCAPG; CDC6; KIF4A; RFC4; MCM2; MCM3;
Up-regulated genes	Molecular function	Chaperone activity	2	126	2.46914	3.56887	0.109092	1	1	1	CLGN; TBCE;
Up-regulated genes	Molecular function	Auxiliary transport protein activity	1	333	1.23457	0.678584	0.778063	1	1	1	SCAMP3;
Up-regulated genes	Molecular function	Motor activity	1	79	1.23457	2.86008	0.298549	1	1	1	KIF20A;
Up-regulated genes	Molecular function	MHC class I receptor activity	1	37	1.23457	6.10579	0.152858	1	1	1	PAGE4;
Up-regulated genes	Molecular function	MHC class II receptor activity	1	38	1.23457	5.94515	0.156652	1	1	1	PAGE4;
Up-regulated genes	Molecular function	Kinase binding	2	16	2.46914	28.0895	0.00227283	0.509113	0.254557	1	CCNA2; CCNB1;
Up-regulated genes	Molecular function	Transcription factor binding	1	10	1.23457	22.575	0.0438122	1	1	1	CENPF;
Up-regulated genes	Molecular function	Kinase regulator activity	1	23	1.23457	9.82074	0.0979445	1	1	1	CCNE2;
Up-regulated genes	Molecular function	Protein tyrosine/serine/threonine phosphatase activity	1	37	1.23457	6.10579	0.152858	1	1	1	CDKN3;
Up-regulated genes	Molecular function	Intracellular ligand-gated ion channel activity	1	30	1.23457	7.53	0.125827	1	1	1	CLIC1;
Up-regulated genes	Molecular function	Protein threonine/tyrosine kinase activity	1	28	1.23457	8.06767	0.117949	1	1	1	TTK;
Up-regulated genes	Molecular function	Cytokine activity	2	107	2.46914	4.20253	0.0828491	1	1	1	NUSAP1; MDK;
Up-regulated genes	Molecular function	Chemokine activity	1	53	1.23457	4.26288	0.211583	1	1	1	CCL20;
Up-regulated genes	Molecular function	Phosphoprotein phosphatase activity	1	6	1.23457	37.5999	0.0265196	1	0.848628	1	DLGAP5;
Up-regulated genes	Molecular function	Sulfotransferase activity	1	53	1.23457	4.26288	0.211583	1	1	1	SULT1C2;
Up-regulated genes	Molecular function	DNA topoisomerase activity	1	6	1.23457	37.5999	0.0265196	1	0.848628	1	TOP2A;
Up-regulated genes	Biological process	Biological_process unknown	7	4731	8.64198	0.331497	0.999982	1	1	1	ASPM; DTL; MUC13; SRXN1; CDCA5; FAM83D; TOMM40L;
Up-regulated genes	Biological process	Protein metabolism	6	1323	7.40741	1.01631	0.546184	1	1	1	SPINK1; UBE2T; UBE2C; IGF2BP3; CLGN; TBCE;
Up-regulated genes	Biological process	Metabolism	8	1683	9.87654	1.06478	0.482381	1	1	1	AKR1B10; SQLE; NQO1; COX7B2; FDPS; SULT1C2; ACSL4; GNPAT;
Up-regulated genes	Biological process	Energy pathways	8	1633	9.87654	1.09739	0.447731	1	1	1	AKR1B10; SQLE; NQO1; COX7B2; FDPS; SULT1C2; ACSL4; GNPAT;
Up-regulated genes	Biological process	Cell growth and/or maintenance	9	1125	11.1111	1.79178	0.0632029	1	1	1	ANLN; COL15A1; SPP1; KIF20A; TPX2; LAMC1; CENPF; COL4A1; TUFT1;
Up-regulated genes	Biological process	Transport	5	1215	6.17284	0.922515	0.63989	1	1	1	LCN2; FLVCR1; AFP; SCAMP3; CLIC1;
Up-regulated genes	Biological process	Cell communication	26	3713	32.0988	1.56722	0.0093568	1	0.333102	1	GPC3; AURKA; CDKN3; S100P; PRC1; CAP2; DLGAP5; ROBO1; MDK; MELK; NUF2; RRAGD; CDC6; TTK; BUB1B; CCNA2; DKK1; CCNB2; REG3A; MKI67; PBK; CCNB1; HMMR; NEK2; RACGAP1; NDC80;
Up-regulated genes	Biological process	Signal transduction	26	3934	32.0988	1.47918	0.0193894	1	0.493045	1	GPC3; AURKA; CDKN3; S100P; PRC1; CAP2; DLGAP5; ROBO1; MDK; MELK; NUF2; RRAGD; CDC6; TTK; BUB1B; CCNA2; DKK1; CCNB2; REG3A; MKI67; PBK; CCNB1; HMMR; NEK2; RACGAP1; NDC80;
Up-regulated genes	Biological process	Regulation of nucleobase, nucleoside, nucleotide and nucleic acid metabolism	15	2828	18.5185	1.18745	0.276124	1	1	1	TOP2A; NCAPG; PTTG1; GMNN; FOXM1; RRM2; RBM24; KIF4A; RFC4; SMYD3; MCM2; MCM3; ILF2; E2F8; IGF2BP2;
Up-regulated genes	Biological process	Regulation of cell cycle	3	57	3.7037	11.8122	0.00211498	0.376467	0.0941167	0.591472	DLGAP5; CCNE2; E2F8;
Up-regulated genes	Biological process	Immune response	2	576	2.46914	0.780696	0.733265	1	1	1	CCL20; PAGE4;
Up-regulated genes	Biological process	Cell cycle	3	22	3.7037	30.5958	0.000124564	0.0221724	0.0110862	0.0696707	PRC1; NUSAP1; CDC20;
Up-regulated genes	Biological process	Synaptic transmission	1	4	1.23457	56.3498	0.0177588	1	0.493045	1	NQO1;
Up-regulated genes	Biological process	Xenobiotic metabolism	1	6	1.23457	37.5978	0.0265211	1	0.590094	1	NQO1;
Up-regulated genes	Biological process	Regulation of translation	1	13	1.23457	17.3684	0.0565853	1	1	1	IGF2BP2;
Up-regulated genes	Biological process	Chromosome segregation	2	7	2.46914	64.1496	0.000408314	0.0726799	0.0242266	0.152251	NUF2; NDC80;
Up-regulated genes	Biological process	Spindle assembly	2	2	2.46914	223.726	1.97284e-05	0.00351165	0.00351165	0.0220688	NUF2; TPX2;
Up-regulated genes	Biological pathway	Vif-mediated degradation of APOBEC3G	1	69	1.85185	1.70446	0.450188	1	1	1	UBE2C;
Up-regulated genes	Biological pathway	Developmental Biology	4	432	7.40741	1.08101	0.513526	1	1	1	CAP2; ROBO1; KIF4A; LAMC1;
Up-regulated genes	Biological pathway	Vpu mediated degradation of CD4	1	67	1.85185	1.75533	0.44052	1	1	1	UBE2C;
Up-regulated genes	Biological pathway	Axon guidance	4	219	7.40741	2.13235	0.117683	1	1	1	CAP2; ROBO1; KIF4A; LAMC1;
Up-regulated genes	Biological pathway	Signaling by Robo receptor	2	23	3.7037	10.1732	0.0163092	1	0.438769	1	CAP2; ROBO1;
Up-regulated genes	Biological pathway	Inactivation of Cdc42 and Rac	1	8	1.85185	14.6847	0.0666878	1	1	1	ROBO1;
Up-regulated genes	Biological pathway	Regulation of Commissural axon pathfinding by Slit and Robo	1	4	1.85185	29.3328	0.0339085	1	0.72512	1	ROBO1;
Up-regulated genes	Biological pathway	Role of Abl in Robo-Slit signaling	2	9	3.7037	25.9806	0.00250589	1	0.0928851	0.555148	CAP2; ROBO1;
Up-regulated genes	Biological pathway	Activation of Rac	1	8	1.85185	14.6847	0.0666878	1	1	1	ROBO1;
Up-regulated genes	Biological pathway	Recycling pathway of L1	1	32	1.85185	3.67462	0.241637	1	1	1	KIF4A;
Up-regulated genes	Biological pathway	L1CAM interactions	2	79	3.7037	2.96272	0.14706	1	1	1	KIF4A; LAMC1;
Up-regulated genes	Biological pathway	Hemostasis	2	375	3.7037	0.624209	0.841176	1	1	1	KIF4A; RACGAP1;
Up-regulated genes	Biological pathway	APC-Cdc20 mediated degradation of Nek2A	4	23	7.40741	20.2957	3.80744e-05	0.0635081	0.00453629	0.0271122	UBE2C; CDC20; BUB1B; NEK2;
Up-regulated genes	Biological pathway	Mitotic Telophase /Cytokinesis	2	18	3.7037	12.9975	0.0101363	1	0.286566	1	UBE2C; KIF20A;
Up-regulated genes	Biological pathway	Mitotic Metaphase/Anaphase Transition	1	22	1.85185	5.34415	0.173045	1	1	1	UBE2C;
Up-regulated genes	Biological pathway	Mitotic Prometaphase	6	99	11.1111	7.06924	0.000183115	0.305436	0.0152718	0.0912752	UBE2C; NUF2; CDC20; BUB1B; CENPF; NDC80;
Up-regulated genes	Biological pathway	Mitotic Prophase	1	62	1.85185	1.89687	0.415613	1	1	1	NEK2;
Up-regulated genes	Biological pathway	Golgi Cisternae Pericentriolar Stack Reorganization	1	62	1.85185	1.89687	0.415613	1	1	1	NEK2;
Up-regulated genes	Biological pathway	Mitotic M-M/G1 phases	12	242	22.2222	5.77945	6.5304e-07	0.00108927	0.000181545	0.00108504	UBE2C; KIF20A; NUF2; GMNN; CDC20; CDC6; BUB1B; CENPF; MCM2; MCM3; NEK2; NDC80;
Up-regulated genes	Biological pathway	M Phase	8	158	14.8148	5.90371	5.17412e-05	0.0863043	0.00553104	0.0330575	UBE2C; KIF20A; NUF2; CDC20; BUB1B; CENPF; NEK2; NDC80;
Up-regulated genes	Biological pathway	DNA Replication	13	261	24.0741	5.80493	1.93747e-07	0.00032317	0.000107723	0.000643833	UBE2C; KIF20A; NUF2; GMNN; CDC20; CDC6; BUB1B; RFC4; CENPF; MCM2; MCM3; NEK2; NDC80;
Up-regulated genes	Biological pathway	Factors involved in megakaryocyte development and platelet production	2	119	3.7037	1.96693	0.272262	1	1	1	KIF4A; RACGAP1;
Up-regulated genes	Biological pathway	Kinesins	2	21	3.7037	11.1416	0.013686	1	0.374234	1	KIF4A; RACGAP1;
Up-regulated genes	Biological pathway	Netrin-1 signaling	1	45	1.85185	2.6133	0.322513	1	1	1	ROBO1;
Up-regulated genes	Biological pathway	Inactivation of APC/C via direct inhibition of the APC/C complex	3	18	5.55556	19.4639	0.000445598	0.743257	0.0247752	0.148075	UBE2C; CDC20; BUB1B;
Up-regulated genes	Biological pathway	Inhibition of the proteolytic activity of APC/C required for the onset of anaphase by mitotic spindle checkpoint components	3	18	5.55556	19.4639	0.000445598	0.743257	0.0247752	0.148075	UBE2C; CDC20; BUB1B;
Up-regulated genes	Biological pathway	Host Interactions of HIV factors	1	141	1.85185	0.834159	0.707565	1	1	1	UBE2C;
Up-regulated genes	Biological pathway	HIV Infection	1	203	1.85185	0.579403	0.831217	1	1	1	UBE2C;
Up-regulated genes	Biological pathway	Signal Transduction	4	1208	7.40741	0.38659	0.995853	1	1	1	UBE2C; SPP1; CCL20; LAMC1;
Up-regulated genes	Biological pathway	CDC6 association with the ORC:origin complex	1	11	1.85185	10.6834	0.0905535	1	1	1	CDC6;
Up-regulated genes	Biological pathway	Assembly of the pre-replicative complex	5	83	9.25926	7.02885	0.000674946	1	0.0341155	0.203899	UBE2C; GMNN; CDC6; MCM2; MCM3;
Up-regulated genes	Biological pathway	DNA Replication Pre-Initiation	5	98	9.25926	5.95312	0.00143242	1	0.0612637	0.366156	UBE2C; GMNN; CDC6; MCM2; MCM3;
Up-regulated genes	Biological pathway	M/G1 Transition	5	98	9.25926	5.95312	0.00143242	1	0.0612637	0.366156	UBE2C; GMNN; CDC6; MCM2; MCM3;
Up-regulated genes	Biological pathway	Autodegradation of Cdh1 by Cdh1:APC/C	1	60	1.85185	1.96009	0.405348	1	1	1	UBE2C;
Up-regulated genes	Biological pathway	APC/C:Cdc20 mediated degradation of Cyclin B	4	22	7.40741	21.2179	3.16537e-05	0.0527984	0.00406141	0.0242739	PTTG1; UBE2C; CDC20; CCNB1;
Up-regulated genes	Biological pathway	APC/C:Cdc20 mediated degradation of Securin	3	66	5.55556	5.31048	0.0187063	1	0.472759	1	PTTG1; UBE2C; CDC20;
Up-regulated genes	Biological pathway	Conversion from APC/C:Cdc20 to APC/C:Cdh1 in late anaphase	2	16	3.7037	14.6212	0.0080377	1	0.235209	1	UBE2C; CDC20;
Up-regulated genes	Biological pathway	APC/C:Cdh1 mediated degradation of Cdc20 and other APC/C:Cdh1 targeted proteins in late mitosis/early G1	4	69	7.40741	6.76721	0.00277623	1	0.100669	0.601669	AURKA; PTTG1; UBE2C; CDC20;
Up-regulated genes	Biological pathway	Loss of Nlp from mitotic centrosomes	1	61	1.85185	1.92796	0.410503	1	1	1	NEK2;
Up-regulated genes	Biological pathway	Regulation of mitotic cell cycle	6	81	11.1111	8.63999	5.96875e-05	0.0995587	0.00553104	0.0330575	AURKA; PTTG1; UBE2C; CDC20; BUB1B; CCNB1;
Up-regulated genes	Biological pathway	Recruitment of NuMA to mitotic centrosomes	1	12	1.85185	9.7939	0.0983748	1	1	1	CCNB1;
Up-regulated genes	Biological pathway	Loss of proteins required for interphase microtubule organizationÃÂ from the centrosome	1	61	1.85185	1.92796	0.410503	1	1	1	NEK2;
Up-regulated genes	Biological pathway	Phosphorylation of Emi1	3	20	5.55556	17.5185	0.000615008	1	0.0320573	0.191598	UBE2C; CDC20; CCNB1;
Up-regulated genes	Biological pathway	APC/C-mediated degradation of cell cycle proteins	6	81	11.1111	8.63999	5.96875e-05	0.0995587	0.00553104	0.0330575	AURKA; PTTG1; UBE2C; CDC20; BUB1B; CCNB1;
Up-regulated genes	Biological pathway	Regulation of APC/C activators between G1/S and early anaphase	4	78	7.40741	5.98648	0.00432764	1	0.14437	0.862861	UBE2C; CDC20; BUB1B; CCNB1;
Up-regulated genes	Biological pathway	APC/C:Cdc20 mediated degradation of mitotic proteins	5	71	9.25926	8.21666	0.000327175	0.545728	0.0218291	0.130467	PTTG1; UBE2C; CDC20; BUB1B; CCNB1;
Up-regulated genes	Biological pathway	Phosphorylation of the APC/C	2	18	3.7037	12.9975	0.0101363	1	0.286566	1	UBE2C; CCNB1;
Up-regulated genes	Biological pathway	Activation of APC/C and APC/C:Cdc20 mediated degradation of mitotic proteins	5	72	9.25926	8.10256	0.000349316	0.582659	0.02241	0.133938	PTTG1; UBE2C; CDC20; BUB1B; CCNB1;
Up-regulated genes	Biological pathway	SCF-beta-TrCP mediated degradation of Emi1	2	70	3.7037	3.34359	0.120885	1	1	1	UBE2C; CDC20;
Up-regulated genes	Biological pathway	Ubiquitin-dependent degradation of Cyclin D	1	66	1.85185	1.78192	0.435623	1	1	1	UBE2C;
Up-regulated genes	Biological pathway	Ubiquitin-dependent degradation of Cyclin D1	1	66	1.85185	1.78192	0.435623	1	1	1	UBE2C;
Up-regulated genes	Biological pathway	Mitotic G2-G2/M phases	5	99	9.25926	5.89299	0.00149888	1	0.0625032	0.373564	UBE2C; CCNA2; CCNB2; CCNB1; NEK2;
Up-regulated genes	Biological pathway	G2/M Transition	5	96	9.25926	6.07713	0.00130609	1	0.0588797	0.351908	UBE2C; CCNA2; CCNB2; CCNB1; NEK2;
Up-regulated genes	Biological pathway	Cyclin A/B1 associated events during G2/M transition	3	14	5.55556	25.021	0.000203666	0.339714	0.0161769	0.0966846	CCNA2; CCNB2; CCNB1;
Up-regulated genes	Biological pathway	Phosphorylation of proteins involved in the G2/M transition by Cyclin A:Cdc2 complexes	1	3	1.85185	39.078	0.0255387	1	0.591647	1	CCNA2;
Up-regulated genes	Biological pathway	Cyclin B2 mediated events	2	6	3.7037	38.9492	0.00106153	1	0.0491843	0.293961	CCNB2; CCNB1;
Up-regulated genes	Biological pathway	Polo-like kinase mediated events	1	18	1.85185	6.53108	0.143935	1	1	1	UBE2C;
Up-regulated genes	Biological pathway	Recruitment of mitotic centrosome proteins and complexes	2	70	3.7037	3.34359	0.120885	1	1	1	CCNB1; NEK2;
Up-regulated genes	Biological pathway	Centrosome maturation	2	70	3.7037	3.34359	0.120885	1	1	1	CCNB1; NEK2;
Up-regulated genes	Biological pathway	E2F-enabled inhibition of pre-replication complex formation	1	10	1.85185	11.7507	0.0826656	1	1	1	CCNB1;
Up-regulated genes	Biological pathway	E2F mediated regulation of DNA replication	3	28	5.55556	12.515	0.00168362	1	0.0684945	0.409372	RRM2; CDC6; CCNB1;
Up-regulated genes	Biological pathway	G1/S-Specific Transcription	2	15	3.7037	15.5953	0.00707168	1	0.214081	1	RRM2; CDC6;
Up-regulated genes	Biological pathway	Phosphorylation of proteins involved in G1/S transition by active Cyclin E:Cdk2 complexes	1	4	1.85185	29.3328	0.0339085	1	0.72512	1	CCNE2;
Up-regulated genes	Biological pathway	SCF(Skp2)-mediated degradation of p27/p21	1	67	1.85185	1.75533	0.44052	1	1	1	UBE2C;
Up-regulated genes	Biological pathway	Cyclin E associated events during G1/S transition	2	78	3.7037	3.0007	0.144094	1	1	1	UBE2C; CCNE2;
Up-regulated genes	Biological pathway	G1/S Transition	7	117	12.963	6.97706	5.53013e-05	0.0922425	0.00553104	0.0330575	UBE2C; RRM2; CDC6; CCNE2; CCNB1; MCM2; MCM3;
Up-regulated genes	Biological pathway	S Phase	5	121	9.25926	4.82163	0.00361323	1	0.128231	0.766403	UBE2C; CDC6; RFC4; MCM2; MCM3;
Up-regulated genes	Biological pathway	Cyclin A:Cdk2-associated events at S phase entry	4	90	7.40741	5.18837	0.00718736	1	0.214081	1	UBE2C; CDC6; MCM2; MCM3;
Up-regulated genes	Biological pathway	G0 and Early G1	2	21	3.7037	11.1416	0.013686	1	0.374234	1	TOP2A; CDC6;
Up-regulated genes	Biological pathway	Mitotic G1-G1/S phases	8	140	14.8148	6.66271	2.16168e-05	0.0360568	0.00318102	0.0190121	TOP2A; UBE2C; RRM2; CDC6; CCNE2; CCNB1; MCM2; MCM3;
Up-regulated genes	Biological pathway	Cell Cycle, Mitotic	21	317	38.8889	7.71845	3.35572e-14	5.59734e-11	5.59734e-11	3.34537e-10	AURKA; TOP2A; PTTG1; UBE2C; KIF20A; NUF2; GMNN; CDC20; RRM2; CDC6; BUB1B; CCNA2; CCNB2; RFC4; CCNE2; CENPF; CCNB1; MCM2; MCM3; NEK2; NDC80;
Up-regulated genes	Biological pathway	Binding of RNA by Insulin-like Growth Factor-2 mRNA Binding Proteins (IGF2BPs/IMPs/VICKZs)	2	3	3.7037	77.769	0.000215853	0.360042	0.0163656	0.0978125	IGF2BP3; IGF2BP2;
Up-regulated genes	Biological pathway	Extension of Telomeres	1	28	1.85185	4.19938	0.214898	1	1	1	RFC4;
Up-regulated genes	Biological pathway	Telomere C-strand (Lagging Strand) Synthesis	1	22	1.85185	5.34415	0.173045	1	1	1	RFC4;
Up-regulated genes	Biological pathway	Telomere Maintenance	1	49	1.85185	2.40001	0.345649	1	1	1	RFC4;
Up-regulated genes	Biological pathway	Diabetes pathways	2	216	3.7037	1.08368	0.558525	1	1	1	IGF2BP3; IGF2BP2;
Up-regulated genes	Biological pathway	Polymerase switching on the C-strand of the telomere	1	14	1.85185	8.39577	0.11382	1	1	1	RFC4;
Up-regulated genes	Biological pathway	Polymerase switching	1	14	1.85185	8.39577	0.11382	1	1	1	RFC4;
Up-regulated genes	Biological pathway	Lagging Strand Synthesis	1	20	1.85185	5.8783	0.158614	1	1	1	RFC4;
Up-regulated genes	Biological pathway	Removal of licensing factors from origins	5	85	9.25926	6.86349	0.000752692	1	0.0369262	0.220698	UBE2C; GMNN; CDC6; MCM2; MCM3;
Up-regulated genes	Biological pathway	Chromosome Maintenance	1	69	1.85185	1.70446	0.450188	1	1	1	RFC4;
Up-regulated genes	Biological pathway	Regulation of DNA replication	5	88	9.25926	6.62953	0.000881644	1	0.0420166	0.251122	UBE2C; GMNN; CDC6; MCM2; MCM3;
Up-regulated genes	Biological pathway	Association of licensing factors with the pre-replicative complex	2	15	3.7037	15.5953	0.00707168	1	0.214081	1	GMNN; CDC6;
Up-regulated genes	Biological pathway	CDT1 association with the CDC6:ORC:origin complex	3	74	5.55556	4.73645	0.0252621	1	0.591647	1	UBE2C; GMNN; CDC6;
Up-regulated genes	Biological pathway	Activation of the pre-replicative complex	3	30	5.55556	11.6809	0.00206141	1	0.0818674	0.489299	CDC6; MCM2; MCM3;
Up-regulated genes	Biological pathway	Synthesis of DNA	5	109	9.25926	5.3524	0.00229483	1	0.0869949	0.519944	UBE2C; CDC6; RFC4; MCM2; MCM3;
Up-regulated genes	Biological pathway	Switching of origins to a post-replicative state	4	83	7.40741	5.62589	0.00540206	1	0.173281	1	UBE2C; CDC6; MCM2; MCM3;
Up-regulated genes	Biological pathway	Orc1 removal from chromatin	4	83	7.40741	5.62589	0.00540206	1	0.173281	1	UBE2C; CDC6; MCM2; MCM3;
Up-regulated genes	Biological pathway	CDK-mediated phosphorylation and removal of Cdc6	2	66	3.7037	3.5462	0.109673	1	1	1	UBE2C; CDC6;
Up-regulated genes	Biological pathway	DNA strand elongation	3	31	5.55556	11.3043	0.0022685	1	0.0869949	0.519944	RFC4; MCM2; MCM3;
Up-regulated genes	Biological pathway	Unwinding of DNA	2	11	3.7037	21.2611	0.00378653	1	0.131582	0.786429	MCM2; MCM3;
Up-regulated genes	Biological pathway	Leading Strand Synthesis	1	14	1.85185	8.39577	0.11382	1	1	1	RFC4;
Up-regulated genes	Biological pathway	Chemokine receptors bind chemokines	1	42	1.85185	2.79992	0.304636	1	1	1	CCL20;
Up-regulated genes	Biological pathway	Signaling by GPCR	1	800	1.85185	0.147029	0.999376	1	1	1	CCL20;
Up-regulated genes	Biological pathway	GPCR ligand binding	1	336	1.85185	0.350063	0.949075	1	1	1	CCL20;
Up-regulated genes	Biological pathway	Class A/1 (Rhodopsin-like receptors)	1	274	1.85185	0.429272	0.910677	1	1	1	CCL20;
Up-regulated genes	Biological pathway	Peptide ligand-binding receptors	1	167	1.85185	0.704297	0.767606	1	1	1	CCL20;
Up-regulated genes	Biological pathway	Adaptive Immune System	1	237	1.85185	0.496286	0.875437	1	1	1	UBE2C;
Up-regulated genes	Biological pathway	Immune System	1	522	1.85185	0.22533	0.990896	1	1	1	UBE2C;
Up-regulated genes	Biological pathway	Signaling by Wnt	1	75	1.85185	1.56812	0.47822	1	1	1	UBE2C;
Up-regulated genes	Biological pathway	Degradation of beta-catenin by the destruction complex	1	75	1.85185	1.56812	0.47822	1	1	1	UBE2C;
Up-regulated genes	Biological pathway	Integrin cell surface interactions	2	72	3.7037	3.25073	0.126595	1	1	1	SPP1; LAMC1;
Up-regulated genes	Biological pathway	Synthesis and interconversion of nucleotide di- and triphosphates	1	16	1.85185	7.34695	0.129005	1	1	1	RRM2;
Up-regulated genes	Biological pathway	DNA Repair	2	106	3.7037	2.20814	0.230721	1	1	1	UBE2T; RFC4;
Up-regulated genes	Biological pathway	Cholesterol biosynthesis	1	20	1.85185	5.8783	0.158614	1	1	1	SQLE;
Up-regulated genes	Biological pathway	Peroxisomal lipid metabolism	1	20	1.85185	5.8783	0.158614	1	1	1	GNPAT;
Up-regulated genes	Biological pathway	Plasmalogen biosynthesis	1	4	1.85185	29.3328	0.0339085	1	0.72512	1	GNPAT;
Up-regulated genes	Biological pathway	Nucleotide Excision Repair	1	49	1.85185	2.40001	0.345649	1	1	1	RFC4;
Up-regulated genes	Biological pathway	Global Genomic NER (GG-NER)	1	33	1.85185	3.56331	0.248181	1	1	1	RFC4;
Up-regulated genes	Biological pathway	Metabolism	3	823	5.55556	0.42593	0.979012	1	1	1	UBE2C; RRM2; NQO1;
Up-regulated genes	Biological pathway	Metabolism of nucleotides	1	58	1.85185	2.02766	0.394907	1	1	1	RRM2;
Up-regulated genes	Biological pathway	Repair synthesis of patch ~27-30 bases long by DNA polymerase	1	15	1.85185	7.83642	0.121445	1	1	1	RFC4;
Up-regulated genes	Biological pathway	Fanconi Anemia pathway	1	22	1.85185	5.34415	0.173045	1	1	1	UBE2T;
Up-regulated genes	Biological pathway	Repair synthesis for gap-filling by DNA polymerase in TC-NER	1	15	1.85185	7.83642	0.121445	1	1	1	RFC4;
Up-regulated genes	Biological pathway	Gap-filling DNA repair synthesis and ligation in TC-NER	1	16	1.85185	7.34695	0.129005	1	1	1	RFC4;
Up-regulated genes	Biological pathway	Transcription-coupled NER (TC-NER)	1	44	1.85185	2.67268	0.316605	1	1	1	RFC4;
Up-regulated genes	Biological pathway	Gap-filling DNA repair synthesis and ligation in GG-NER	1	16	1.85185	7.34695	0.129005	1	1	1	RFC4;
Up-regulated genes	Biological pathway	Stabilization of p53	1	69	1.85185	1.70446	0.450188	1	1	1	UBE2C;
Up-regulated genes	Biological pathway	p53-Dependent G1 DNA Damage Response	1	72	1.85185	1.63345	0.464384	1	1	1	UBE2C;
Up-regulated genes	Biological pathway	p53-Dependent G1/S DNA damage checkpoint	1	72	1.85185	1.63345	0.464384	1	1	1	UBE2C;
Up-regulated genes	Biological pathway	G1/S DNA Damage Checkpoints	1	76	1.85185	1.54749	0.482754	1	1	1	UBE2C;
Up-regulated genes	Biological pathway	Cell Cycle Checkpoints	9	118	16.6667	8.89167	5.54656e-07	0.000925166	0.000181545	0.00108504	UBE2C; CDC20; CDC6; BUB1B; CCNB2; RFC4; CCNB1; MCM2; MCM3;
Up-regulated genes	Biological pathway	Autodegradation of the E3 ubiquitin ligase COP1	1	68	1.85185	1.72952	0.445375	1	1	1	UBE2C;
Up-regulated genes	Biological pathway	G2/M DNA damage checkpoint	4	29	7.40741	16.0981	9.82975e-05	0.16396	0.00862948	0.051576	CDC6; CCNB1; MCM2; MCM3;
Up-regulated genes	Biological pathway	G2/M Checkpoints	6	43	11.1111	16.2735	1.43902e-06	0.00240029	0.000300036	0.00179323	CDC6; CCNB2; RFC4; CCNB1; MCM2; MCM3;
Up-regulated genes	Biological pathway	G2/M DNA replication checkpoint	2	4	3.7037	58.3753	0.000429327	0.716117	0.0247752	0.148075	CCNB2; CCNB1;
Up-regulated genes	Biological pathway	Chk1/Chk2(Cds1) mediated inactivation of Cyclin B:Cdk1 complex	1	5	1.85185	23.478	0.0422077	1	0.880031	1	CCNB1;
Up-regulated genes	Biological pathway	p53-Independent G1/S DNA damage checkpoint	1	70	1.85185	1.68011	0.454961	1	1	1	UBE2C;
Up-regulated genes	Biological pathway	Ubiquitin Mediated Degradation of Phosphorylated Cdc25A	1	69	1.85185	1.70446	0.450188	1	1	1	UBE2C;
Up-regulated genes	Biological pathway	p53-Independent DNA Damage Response	1	70	1.85185	1.68011	0.454961	1	1	1	UBE2C;
Up-regulated genes	Biological pathway	Activation of ATR in response to replication stress	4	37	7.40741	12.6183	0.000259783	0.433318	0.0180549	0.107909	CDC6; RFC4; MCM2; MCM3;
Up-regulated genes	Biological pathway	Mitotic Spindle Checkpoint	3	19	5.55556	18.44	0.000525942	0.877271	0.0282991	0.169136	UBE2C; CDC20; BUB1B;
Up-regulated genes	Biological pathway	Post-chaperonin tubulin folding pathway	1	12	1.85185	9.7939	0.0983748	1	1	1	TBCE;
Up-regulated genes	Biological pathway	Protein folding	1	28	1.85185	4.19938	0.214898	1	1	1	TBCE;
Up-regulated genes	Biological pathway	Metabolism of proteins	1	259	1.85185	0.454132	0.89776	1	1	1	TBCE;
Up-regulated genes	Biological pathway	Regulation of ornithine decarboxylase (ODC)	2	70	3.7037	3.34359	0.120885	1	1	1	UBE2C; NQO1;
Up-regulated genes	Biological pathway	Regulation of mRNA Stability by Proteins that Bind AU-rich Elements	1	104	1.85185	1.1309	0.595117	1	1	1	UBE2C;
Up-regulated genes	Biological pathway	Destabilization of mRNA by AUF1 (hnRNP D0)	1	71	1.85185	1.65645	0.459693	1	1	1	UBE2C;
Up-regulated genes	Biological pathway	Metabolism of mRNA	1	234	1.85185	0.502648	0.872044	1	1	1	UBE2C;
Up-regulated genes	Biological pathway	Metabolism of RNA	1	281	1.85185	0.418578	0.916143	1	1	1	UBE2C;
Up-regulated genes	Biological pathway	Metabolism of amino acids and derivatives	2	188	3.7037	1.24507	0.483393	1	1	1	UBE2C; NQO1;
Up-regulated genes	Biological pathway	Fatty Acyl-CoA Biosynthesis	1	18	1.85185	6.53108	0.143935	1	1	1	ACSL4;
Up-regulated genes	Biological pathway	Synthesis of very long-chain fatty acyl-CoAs	1	14	1.85185	8.39577	0.11382	1	1	1	ACSL4;
Up-regulated genes	Biological pathway	Fatty acid, triacylglycerol, and ketone body metabolism	1	83	1.85185	1.41699	0.513424	1	1	1	ACSL4;
Up-regulated genes	Biological pathway	Triglyceride Biosynthesis	1	28	1.85185	4.19938	0.214898	1	1	1	ACSL4;
Up-regulated genes	Biological pathway	Transmembrane transport of small molecules	1	378	1.85185	0.311168	0.965313	1	1	1	FLVCR1;
Up-regulated genes	Biological pathway	Iron uptake and transport	1	37	1.85185	3.17819	0.273807	1	1	1	FLVCR1;
Up-regulated genes	Biological pathway	Metabolism of lipids and lipoproteins	3	257	5.55556	1.36393	0.380315	1	1	1	SQLE; ACSL4; GNPAT;
Up-regulated genes	Biological pathway	Class I MHC mediated antigen processing & presentation	1	101	1.85185	1.16449	0.584329	1	1	1	UBE2C;
Up-regulated genes	Biological pathway	Antigen processing: Ubiquitination & Proteasome degradation	1	69	1.85185	1.70446	0.450188	1	1	1	UBE2C;
Up-regulated genes	Biological pathway	Regulation of Apoptosis	1	75	1.85185	1.56812	0.47822	1	1	1	UBE2C;
Up-regulated genes	Biological pathway	Regulation of activated PAK-2p34 by proteasome mediated degradation	1	66	1.85185	1.78192	0.435623	1	1	1	UBE2C;
Up-regulated genes	Biological pathway	Cdc20:Phospho-APC/C mediated degradation of Cyclin A	3	69	5.55556	5.07962	0.0210372	1	0.516031	1	UBE2C; CDC20; BUB1B;
Up-regulated genes	Biological pathway	Apoptosis	1	158	1.85185	0.744413	0.748336	1	1	1	UBE2C;
Up-regulated genes	Biological pathway	Cross-presentation of soluble exogenous antigens (endosomes)	1	67	1.85185	1.75533	0.44052	1	1	1	UBE2C;
Up-regulated genes	Biological pathway	Antigen processing-Cross presentation	1	86	1.85185	1.36757	0.526015	1	1	1	UBE2C;
Up-regulated genes	Biological pathway	ER-Phagosome pathway	1	80	1.85185	1.47012	0.500505	1	1	1	UBE2C;
Up-regulated genes	Biological pathway	fatty acid activation	1	6	1.85185	19.5715	0.050437	1	1	1	ACSL4;
Up-regulated genes	Biological pathway	trans,trans-farnesyl diphosphate biosynthesis	1	4	1.85185	29.3328	0.0339085	1	0.72512	1	FDPS;
Up-regulated genes	Biological pathway	superpathway of geranylgeranyldiphosphate biosynthesis I (via mevalonate)	1	13	1.85185	9.0411	0.10613	1	1	1	FDPS;
Up-regulated genes	Biological pathway	gamma-linolenate biosynthesis II (animals)	1	7	1.85185	16.7796	0.0585968	1	1	1	ACSL4;
Up-regulated genes	Biological pathway	stearate biosynthesis I (animals)	1	12	1.85185	9.7939	0.0983748	1	1	1	ACSL4;
Up-regulated genes	Biological pathway	cholesterol biosynthesis II (via 24,25-dihydrolanosterol)	1	13	1.85185	9.0411	0.10613	1	1	1	SQLE;
Up-regulated genes	Biological pathway	cholesterol biosynthesis I	1	13	1.85185	9.0411	0.10613	1	1	1	SQLE;
Up-regulated genes	Biological pathway	cholesterol biosynthesis III (via desmosterol)	1	13	1.85185	9.0411	0.10613	1	1	1	SQLE;
Up-regulated genes	Biological pathway	superpathway of cholesterol biosynthesis	2	25	3.7037	9.35965	0.019129	1	0.476225	1	SQLE; FDPS;
Up-regulated genes	Biological pathway	guanosine nucleotides de novo biosynthesis	1	14	1.85185	8.39577	0.11382	1	1	1	RRM2;
Up-regulated genes	Biological pathway	pyrimidine deoxyribonucleotides de novo biosynthesis	1	14	1.85185	8.39577	0.11382	1	1	1	RRM2;
Up-regulated genes	Biological pathway	epoxysqualene biosynthesis	1	2	1.85185	58.5198	0.0170978	1	0.442329	1	SQLE;
Up-regulated genes	Biological pathway	methylglyoxal degradation III	1	3	1.85185	39.078	0.0255387	1	0.591647	1	AKR1B10;
Up-regulated genes	Biological pathway	acetone degradation I (to methylglyoxal)	1	7	1.85185	16.7796	0.0585968	1	1	1	AKR1B10;
Up-regulated genes	Biological pathway	fatty acid beta-oxidation I	1	19	1.85185	6.18752	0.151306	1	1	1	ACSL4;
Up-regulated genes	Biological pathway	Validated transcriptional targets of TAp63 isoforms	1	54	1.85185	2.17783	0.373481	1	1	1	NQO1;
Up-regulated genes	Biological pathway	Wnt signaling network	1	200	1.85185	0.588094	0.826645	1	1	1	DKK1;
Up-regulated genes	Biological pathway	Osteopontin-mediated events	1	29	1.85185	4.05463	0.221668	1	1	1	SPP1;
Up-regulated genes	Biological pathway	Regulation of cytoplasmic and nuclear SMAD2/3 signaling	1	305	1.85185	0.385642	0.932506	1	1	1	LAMC1;
Up-regulated genes	Biological pathway	IL2 signaling events mediated by STAT5	1	28	1.85185	4.19938	0.214898	1	1	1	CCNA2;
Up-regulated genes	Biological pathway	Validated targets of C-MYC transcriptional repression	1	63	1.85185	1.86676	0.42068	1	1	1	DKK1;
Up-regulated genes	Biological pathway	Integrins in angiogenesis	1	64	1.85185	1.8376	0.425704	1	1	1	SPP1;
Up-regulated genes	Biological pathway	Syndecan-1-mediated signaling events	8	1297	14.8148	0.719228	0.894255	1	1	1	SPP1; ROBO1; RRAGD; CCNA2; DKK1; LAMC1; CCNB1; AFP;
Up-regulated genes	Biological pathway	Regulation of CDC42 activity	5	768	9.25926	0.75971	0.805761	1	1	1	CCNA2; DKK1; LAMC1; AFP; RACGAP1;
Up-regulated genes	Biological pathway	Glypican pathway	10	1335	18.5185	0.873226	0.737758	1	1	1	GPC3; SPP1; ROBO1; MDK; RRAGD; CCNA2; DKK1; LAMC1; CCNB1; AFP;
Up-regulated genes	Biological pathway	GMCSF-mediated signaling events	8	1289	14.8148	0.723691	0.890118	1	1	1	SPP1; ROBO1; RRAGD; CCNA2; DKK1; LAMC1; CCNB1; AFP;
Up-regulated genes	Biological pathway	Validated transcriptional targets of deltaNp63 isoforms	2	64	3.7037	3.657	0.10418	1	1	1	TOP2A; CCNB2;
Up-regulated genes	Biological pathway	Insulin Pathway	8	1285	14.8148	0.725944	0.888002	1	1	1	SPP1; ROBO1; RRAGD; CCNA2; DKK1; LAMC1; CCNB1; AFP;
Up-regulated genes	Biological pathway	C-MYC pathway	2	149	3.7037	1.57093	0.367361	1	1	1	DKK1; CCNB1;
Up-regulated genes	Biological pathway	Stabilization and expansion of the E-cadherin adherens junction	3	275	5.55556	1.27466	0.422514	1	1	1	SPP1; ROBO1; DKK1;
Up-regulated genes	Biological pathway	FOXA transcription factor networks	1	81	1.85185	1.45198	0.504848	1	1	1	AFP;
Up-regulated genes	Biological pathway	Glypican 3 network	2	206	3.7037	1.13628	0.532568	1	1	1	GPC3; DKK1;
Up-regulated genes	Biological pathway	Nectin adhesion pathway	8	1292	14.8148	0.722011	0.891685	1	1	1	SPP1; ROBO1; RRAGD; CCNA2; DKK1; LAMC1; CCNB1; AFP;
Up-regulated genes	Biological pathway	FGF signaling pathway	1	48	1.85185	2.45	0.339939	1	1	1	SPP1;
Up-regulated genes	Biological pathway	Aurora B signaling	5	41	9.25926	14.2274	2.28851e-05	0.0381723	0.00318102	0.0190121	AURKA; NCAPG; KIF20A; RACGAP1; NDC80;
Up-regulated genes	Biological pathway	TRAIL signaling pathway	8	1325	14.8148	0.704029	0.907764	1	1	1	SPP1; ROBO1; RRAGD; CCNA2; DKK1; LAMC1; CCNB1; AFP;
Up-regulated genes	Biological pathway	IGF1 pathway	8	1288	14.8148	0.724253	0.889592	1	1	1	SPP1; ROBO1; RRAGD; CCNA2; DKK1; LAMC1; CCNB1; AFP;
Up-regulated genes	Biological pathway	PLK1 signaling events	9	104	16.6667	10.0885	1.86729e-07	0.000311464	0.000107723	0.000643833	AURKA; PRC1; DLGAP5; KIF20A; CDC20; TPX2; BUB1B; CCNB1; NDC80;
Up-regulated genes	Biological pathway	ATF-2 transcription factor network	1	59	1.85185	1.9933	0.40015	1	1	1	CCNA2;
Up-regulated genes	Biological pathway	CDC42 signaling events	5	755	9.25926	0.772791	0.793166	1	1	1	CCNA2; DKK1; LAMC1; AFP; RACGAP1;
Up-regulated genes	Biological pathway	Signaling events mediated by Hepatocyte Growth Factor Receptor (c-Met)	8	1290	14.8148	0.72313	0.890642	1	1	1	SPP1; ROBO1; RRAGD; CCNA2; DKK1; LAMC1; CCNB1; AFP;
Up-regulated genes	Biological pathway	Glypican 1 network	8	1296	14.8148	0.719783	0.893745	1	1	1	SPP1; ROBO1; RRAGD; CCNA2; DKK1; LAMC1; CCNB1; AFP;
Up-regulated genes	Biological pathway	Validated targets of C-MYC transcriptional activation	1	81	1.85185	1.45198	0.504848	1	1	1	CCNB1;
Up-regulated genes	Biological pathway	N-cadherin signaling events	3	251	5.55556	1.39654	0.366114	1	1	1	SPP1; ROBO1; DKK1;
Up-regulated genes	Biological pathway	PDGF receptor signaling network	8	1290	14.8148	0.72313	0.890642	1	1	1	SPP1; ROBO1; RRAGD; CCNA2; DKK1; LAMC1; CCNB1; AFP;
Up-regulated genes	Biological pathway	Integrin family cell surface interactions	10	1375	18.5185	0.847823	0.77296	1	1	1	SPP1; ROBO1; MDK; RRAGD; CCNA2; DKK1; LAMC1; CCNB1; COL4A1; AFP;
Up-regulated genes	Biological pathway	Fanconi anemia pathway	2	48	3.7037	4.87575	0.0635	1	1	1	UBE2T; RFC4;
Up-regulated genes	Biological pathway	Internalization of ErbB1	8	1285	14.8148	0.725944	0.888002	1	1	1	SPP1; ROBO1; RRAGD; CCNA2; DKK1; LAMC1; CCNB1; AFP;
Up-regulated genes	Biological pathway	TGF-beta receptor signaling	1	305	1.85185	0.385642	0.932506	1	1	1	LAMC1;
Up-regulated genes	Biological pathway	FOXA2 and FOXA3 transcription factor networks	1	43	1.85185	2.73482	0.310646	1	1	1	AFP;
Up-regulated genes	Biological pathway	Posttranslational regulation of adherens junction stability and dissassembly	3	231	5.55556	1.51744	0.318579	1	1	1	SPP1; ROBO1; DKK1;
Up-regulated genes	Biological pathway	Signaling events mediated by VEGFR1 and VEGFR2	8	1293	14.8148	0.721453	0.892203	1	1	1	SPP1; ROBO1; RRAGD; CCNA2; DKK1; LAMC1; CCNB1; AFP;
Up-regulated genes	Biological pathway	Beta1 integrin cell surface interactions	10	1348	18.5185	0.864805	0.749552	1	1	1	SPP1; ROBO1; MDK; RRAGD; CCNA2; DKK1; LAMC1; CCNB1; COL4A1; AFP;
Up-regulated genes	Biological pathway	Urokinase-type plasminogen activator (uPA) and uPAR-mediated signaling	8	1285	14.8148	0.725944	0.888002	1	1	1	SPP1; ROBO1; RRAGD; CCNA2; DKK1; LAMC1; CCNB1; AFP;
Up-regulated genes	Biological pathway	Signaling by Aurora kinases	7	98	12.963	8.32961	1.74825e-05	0.0291607	0.00291607	0.0174286	AURKA; NCAPG; DLGAP5; KIF20A; TPX2; RACGAP1; NDC80;
Up-regulated genes	Biological pathway	Polo-like kinase signaling events in the cell cycle	9	109	16.6667	9.62577	2.8047e-07	0.000467824	0.000116956	0.000699014	AURKA; PRC1; DLGAP5; KIF20A; CDC20; TPX2; BUB1B; CCNB1; NDC80;
Up-regulated genes	Biological pathway	IFN-gamma pathway	8	1293	14.8148	0.721453	0.892203	1	1	1	SPP1; ROBO1; RRAGD; CCNA2; DKK1; LAMC1; CCNB1; AFP;
Up-regulated genes	Biological pathway	Regulation of RAC1 activity	2	205	3.7037	1.14182	0.529917	1	1	1	CCNA2; RACGAP1;
Up-regulated genes	Biological pathway	PAR1-mediated thrombin signaling events	8	1296	14.8148	0.719783	0.893745	1	1	1	SPP1; ROBO1; RRAGD; CCNA2; DKK1; LAMC1; CCNB1; AFP;
Up-regulated genes	Biological pathway	Beta3 integrin cell surface interactions	3	43	5.55556	8.15031	0.00579255	1	0.182301	1	SPP1; LAMC1; COL4A1;
Up-regulated genes	Biological pathway	Noncanonical Wnt signaling pathway	1	182	1.85185	0.646254	0.796553	1	1	1	DKK1;
Up-regulated genes	Biological pathway	Alpha4 beta1 integrin signaling events	2	33	3.7037	7.09133	0.0322327	1	0.72512	1	SPP1; MDK;
Up-regulated genes	Biological pathway	PDGFR-beta signaling pathway	8	1285	14.8148	0.725944	0.888002	1	1	1	SPP1; ROBO1; RRAGD; CCNA2; DKK1; LAMC1; CCNB1; AFP;
Up-regulated genes	Biological pathway	p63 transcription factor network	3	105	5.55556	3.3382	0.060774	1	1	1	TOP2A; CCNB2; NQO1;
Up-regulated genes	Biological pathway	Canonical Wnt signaling pathway	1	155	1.85185	0.75882	0.741571	1	1	1	DKK1;
Up-regulated genes	Biological pathway	E-cadherin signaling in the nascent adherens junction	3	275	5.55556	1.27466	0.422514	1	1	1	SPP1; ROBO1; DKK1;
Up-regulated genes	Biological pathway	Integrin-linked kinase signaling	5	654	9.25926	0.892135	0.674515	1	1	1	AURKA; CCNA2; DKK1; LAMC1; AFP;
Up-regulated genes	Biological pathway	Regulation of nuclear beta catenin signaling and target gene transcription	1	135	1.85185	0.87123	0.691681	1	1	1	DKK1;
Up-regulated genes	Biological pathway	EGF receptor (ErbB1) signaling pathway	8	1285	14.8148	0.725944	0.888002	1	1	1	SPP1; ROBO1; RRAGD; CCNA2; DKK1; LAMC1; CCNB1; AFP;
Up-regulated genes	Biological pathway	Thrombin/protease-activated receptor (PAR) pathway	8	1297	14.8148	0.719228	0.894255	1	1	1	SPP1; ROBO1; RRAGD; CCNA2; DKK1; LAMC1; CCNB1; AFP;
Up-regulated genes	Biological pathway	Class I PI3K signaling events	8	1285	14.8148	0.725944	0.888002	1	1	1	SPP1; ROBO1; RRAGD; CCNA2; DKK1; LAMC1; CCNB1; AFP;
Up-regulated genes	Biological pathway	Arf6 signaling events	8	1285	14.8148	0.725944	0.888002	1	1	1	SPP1; ROBO1; RRAGD; CCNA2; DKK1; LAMC1; CCNB1; AFP;
Up-regulated genes	Biological pathway	Plasma membrane estrogen receptor signaling	8	1298	14.8148	0.718674	0.894764	1	1	1	SPP1; ROBO1; RRAGD; CCNA2; DKK1; LAMC1; CCNB1; AFP;
Up-regulated genes	Biological pathway	FoxO family signaling	1	49	1.85185	2.40001	0.345649	1	1	1	CCNB1;
Up-regulated genes	Biological pathway	IL2-mediated signaling events	1	115	1.85185	1.02273	0.63237	1	1	1	CCNA2;
Up-regulated genes	Biological pathway	C-MYB transcription factor network	1	84	1.85185	1.40013	0.517657	1	1	1	CCNB1;
Up-regulated genes	Biological pathway	p73 transcription factor network	4	78	7.40741	5.98648	0.00432764	1	0.14437	0.862861	CCNA2; CCNE2; CCNB1; AFP;
Up-regulated genes	Biological pathway	FOXM1 transcription factor network	6	42	11.1111	16.6609	1.24639e-06	0.00207898	0.000296997	0.00177507	FOXM1; CCNA2; CCNB2; CENPF; CCNB1; NEK2;
Up-regulated genes	Biological pathway	IL3-mediated signaling events	8	1292	14.8148	0.722011	0.891685	1	1	1	SPP1; ROBO1; RRAGD; CCNA2; DKK1; LAMC1; CCNB1; AFP;
Up-regulated genes	Biological pathway	AP-1 transcription factor network	4	621	7.40741	0.752009	0.794313	1	1	1	CCNA2; DKK1; LAMC1; AFP;
Up-regulated genes	Biological pathway	Glucocorticoid receptor signaling	1	85	1.85185	1.38366	0.521854	1	1	1	AFP;
Up-regulated genes	Biological pathway	mTOR signaling pathway	8	1285	14.8148	0.725944	0.888002	1	1	1	SPP1; ROBO1; RRAGD; CCNA2; DKK1; LAMC1; CCNB1; AFP;
Up-regulated genes	Biological pathway	RAC1 signaling pathway	2	205	3.7037	1.14182	0.529917	1	1	1	CCNA2; RACGAP1;
Up-regulated genes	Biological pathway	ErbB receptor signaling network	8	1308	14.8148	0.713179	0.89974	1	1	1	SPP1; ROBO1; RRAGD; CCNA2; DKK1; LAMC1; CCNB1; AFP;
Up-regulated genes	Biological pathway	Signaling events mediated by focal adhesion kinase	8	1285	14.8148	0.725944	0.888002	1	1	1	SPP1; ROBO1; RRAGD; CCNA2; DKK1; LAMC1; CCNB1; AFP;
Up-regulated genes	Biological pathway	VEGF and VEGFR signaling network	8	1301	14.8148	0.717016	0.896277	1	1	1	SPP1; ROBO1; RRAGD; CCNA2; DKK1; LAMC1; CCNB1; AFP;
Up-regulated genes	Biological pathway	Glucocorticoid receptor regulatory network	1	80	1.85185	1.47012	0.500505	1	1	1	AFP;
Up-regulated genes	Biological pathway	Alpha9 beta1 integrin signaling events	8	1302	14.8148	0.716466	0.896777	1	1	1	SPP1; ROBO1; RRAGD; CCNA2; DKK1; LAMC1; CCNB1; AFP;
Up-regulated genes	Biological pathway	Syndecan-2-mediated signaling events	1	77	1.85185	1.5274	0.487249	1	1	1	SPP1;
Up-regulated genes	Biological pathway	ALK1 pathway	1	324	1.85185	0.363028	0.943198	1	1	1	LAMC1;
Up-regulated genes	Biological pathway	Arf6 downstream pathway	8	1285	14.8148	0.725944	0.888002	1	1	1	SPP1; ROBO1; RRAGD; CCNA2; DKK1; LAMC1; CCNB1; AFP;
Up-regulated genes	Biological pathway	Validated transcriptional targets of AP1 family members Fra1 and Fra2	1	134	1.85185	0.877731	0.688952	1	1	1	CCNA2;
Up-regulated genes	Biological pathway	S1P1 pathway	8	1285	14.8148	0.725944	0.888002	1	1	1	SPP1; ROBO1; RRAGD; CCNA2; DKK1; LAMC1; CCNB1; AFP;
Up-regulated genes	Biological pathway	ATM pathway	12	307	22.2222	4.55583	7.95794e-06	0.0132739	0.00147487	0.0088149	UBE2T; SPP1; RRM2; CDC6; CCNA2; DKK1; RFC4; CCNE2; CCNB1; MCM2; MCM3; AFP;
Up-regulated genes	Biological pathway	p53 pathway	5	189	9.25926	3.08695	0.0223483	1	0.540246	1	SPP1; CCNA2; DKK1; CCNB1; AFP;
Up-regulated genes	Biological pathway	ErbB1 downstream signaling	8	1285	14.8148	0.725944	0.888002	1	1	1	SPP1; ROBO1; RRAGD; CCNA2; DKK1; LAMC1; CCNB1; AFP;
Up-regulated genes	Biological pathway	EGFR-dependent Endothelin signaling events	8	1286	14.8148	0.72538	0.888534	1	1	1	SPP1; ROBO1; RRAGD; CCNA2; DKK1; LAMC1; CCNB1; AFP;
Up-regulated genes	Biological pathway	Syndecan-4-mediated signaling events	2	209	3.7037	1.11997	0.540459	1	1	1	MDK; DKK1;
Up-regulated genes	Biological pathway	Alpha6 beta4 integrin-ligand interactions	1	11	1.85185	10.6834	0.0905535	1	1	1	LAMC1;
Up-regulated genes	Biological pathway	ATR signaling pathway	9	250	16.6667	4.19705	0.000237473	0.396105	0.017222	0.102931	UBE2T; SPP1; CDC6; CCNA2; DKK1; RFC4; CCNB1; MCM2; AFP;
Up-regulated genes	Biological pathway	Regulation of nuclear SMAD2/3 signaling	1	305	1.85185	0.385642	0.932506	1	1	1	LAMC1;
Up-regulated genes	Biological pathway	ALK1 signaling events	1	321	1.85185	0.366421	0.941628	1	1	1	LAMC1;
Up-regulated genes	Biological pathway	Arf6 trafficking events	8	1285	14.8148	0.725944	0.888002	1	1	1	SPP1; ROBO1; RRAGD; CCNA2; DKK1; LAMC1; CCNB1; AFP;
Up-regulated genes	Biological pathway	E-cadherin signaling events	3	280	5.55556	1.2519	0.434089	1	1	1	SPP1; ROBO1; DKK1;
Up-regulated genes	Biological pathway	Endothelins	8	1304	14.8148	0.715367	0.897773	1	1	1	SPP1; ROBO1; RRAGD; CCNA2; DKK1; LAMC1; CCNB1; AFP;
Up-regulated genes	Biological pathway	Presenilin action in Notch and Wnt signaling	1	46	1.85185	2.5565	0.328371	1	1	1	DKK1;
Up-regulated genes	Biological pathway	Regulation of retinoblastoma protein	1	66	1.85185	1.78192	0.435623	1	1	1	CCNA2;
Up-regulated genes	Biological pathway	E2F transcription factor network	5	73	9.25926	7.99158	0.000372575	0.621455	0.0230168	0.137565	RRM2; CDC6; CCNA2; CCNE2; MCM3;
Up-regulated genes	Biological pathway	IL5-mediated signaling events	8	1289	14.8148	0.723691	0.890118	1	1	1	SPP1; ROBO1; RRAGD; CCNA2; DKK1; LAMC1; CCNB1; AFP;
Up-regulated genes	Biological pathway	Direct p53 effectors	4	138	7.40741	3.38385	0.0301117	1	0.688031	1	SPP1; DKK1; CCNB1; AFP;
Up-regulated genes	Biological pathway	Sphingosine 1-phosphate (S1P) pathway	8	1308	14.8148	0.713179	0.89974	1	1	1	SPP1; ROBO1; RRAGD; CCNA2; DKK1; LAMC1; CCNB1; AFP;
Up-regulated genes	Biological pathway	Proteoglycan syndecan-mediated signaling events	9	1342	16.6667	0.781891	0.843685	1	1	1	SPP1; ROBO1; MDK; RRAGD; CCNA2; DKK1; LAMC1; CCNB1; AFP;
Up-regulated genes	Biological pathway	Glypican 2 network	1	2	1.85185	58.5198	0.0170978	1	0.442329	1	MDK;
Up-regulated genes	Biological pathway	Aurora A signaling	3	64	5.55556	5.47641	0.0172371	1	0.442329	1	AURKA; DLGAP5; TPX2;
Up-regulated genes	Biological pathway	RhoA signaling pathway	2	205	3.7037	1.14182	0.529917	1	1	1	CCNA2; RACGAP1;
Up-regulated genes	Biological pathway	Class I PI3K signaling events mediated by Akt	8	1285	14.8148	0.725944	0.888002	1	1	1	SPP1; ROBO1; RRAGD; CCNA2; DKK1; LAMC1; CCNB1; AFP;
Up-regulated genes	Biological pathway	LKB1 signaling events	8	1305	14.8148	0.714819	0.898267	1	1	1	SPP1; ROBO1; RRAGD; CCNA2; DKK1; LAMC1; CCNB1; AFP;
Up-regulated genes	Biological pathway	Regulation of RhoA activity	2	205	3.7037	1.14182	0.529917	1	1	1	CCNA2; RACGAP1;
Up-regulated genes	Biological pathway	Signaling events mediated by PRL	1	23	1.85185	5.11189	0.18017	1	1	1	CCNA2;
Up-regulated genes	Biological pathway	Wnt	1	82	1.85185	1.43427	0.509154	1	1	1	DKK1;
Up-regulated genes	Biological pathway	Hedgehog	1	16	1.85185	7.34695	0.129005	1	1	1	CCNB1;
Up-regulated genes	Biological pathway	TGFBR	1	125	1.85185	0.940922	0.663305	1	1	1	CCNB2;
Up-regulated genes	Biological pathway	ID	1	14	1.85185	8.39577	0.11382	1	1	1	CCNA2;
Up-regulated genes	Biological pathway	Mesenchymal-to-epithelial transition	5	223	9.25926	2.61632	0.0414471	1	0.875112	1	AKR1B10; S100P; LCN2; NQO1; TUFT1;
Up-regulated genes	Biological pathway	Epithelial-to-mesenchymal transition	1	185	1.85185	0.635775	0.801902	1	1	1	COL15A1;
Down-regulated genes	Molecular function	Molecular function unknown	22	5685	12.1547	0.387672	1	1	1	1	HAMP; CLRN3; PROZ; TMEM27; CRHBP; MT1G; LY6E; TMEM45A; C8orf4; STEAP4; SRPX; IGFALS; OGDHL; COLEC10; KBTBD11; TIMD4; AMDHD1; COLEC11; WDR72; PBLD; ASPG; CCDC3;
Down-regulated genes	Molecular function	Protease inhibitor activity	1	94	0.552486	1.07578	0.611656	1	1	1	SPP2;
Down-regulated genes	Molecular function	Acyltransferase activity	5	80	2.76243	6.27002	0.00123367	0.276342	0.0451782	0.247999	NAT2; LCAT; GLYAT; ACAA1; MOGAT2;
Down-regulated genes	Molecular function	Cell adhesion molecule activity	4	356	2.20994	1.12787	0.476965	1	1	1	FCN3; CLEC4M; FCN2; AZGP1;
Down-regulated genes	Molecular function	Ligase activity	5	112	2.76243	4.47875	0.00533384	1	0.132753	0.728729	CPS1; ASS1; GYS2; ACSM3; ACSL1;
Down-regulated genes	Molecular function	Transaminase activity	4	23	2.20994	17.4503	7.3431e-05	0.0164485	0.00548285	0.0300972	TAT; AADAT; OAT; AGXT;
Down-regulated genes	Molecular function	Transporter activity	14	576	7.73481	2.43548	0.00197159	0.441636	0.0552045	0.303037	MBL2; APOF; APOA5; MT1F; MT1M; FETUB; CETP; MT1X; SHBG; HPX; MT1E; APOA1; FABP1; SLC27A5;
Down-regulated genes	Molecular function	Translation regulator activity	1	101	0.552486	1.00123	0.63814	1	1	1	HRSP12;
Down-regulated genes	Molecular function	Catalytic activity	34	532	18.7845	6.40122	3.66468e-18	8.20888e-16	8.20888e-16	4.50614e-15	CYP1A2; RDH16; PCK1; HAO2; CYP8B1; CYP2C8; CYP4A11; ALDH8A1; SRD5A2; CYP2E1; ADH4; AKR1D1; CYP3A4; TDO2; KMO; CYP39A1; BBOX1; BCO2; ASS1; HPD; ADH6; HSD11B1; CYP2C9; CA2; CYP26A1; MAT1A; PHGDH; AOX1; HAO1; CYP2J2; FMO3; PDK4; CYP2C19; ENO3;
Down-regulated genes	Molecular function	Transferase activity	2	156	1.10497	1.29009	0.463045	1	1	1	AGXT2; HMGCS2;
Down-regulated genes	Molecular function	Oxidoreductase activity	4	161	2.20994	2.49383	0.0780524	1	0.832559	1	IDO2; ADH1A; DCXR; AKR7A3;
Down-regulated genes	Molecular function	Ion channel activity	2	66	1.10497	3.04903	0.140908	1	1	1	FXYD1; GPM6A;
Down-regulated genes	Molecular function	Hydrolase activity	9	203	4.97238	4.44409	0.000207721	0.0465296	0.0116324	0.0638543	FBP1; GLS2; BCHE; VNN1; ACOT12; EPHX2; PON1; DPYS; G6PC;
Down-regulated genes	Molecular function	Serine-type peptidase activity	2	98	1.10497	2.05353	0.256312	1	1	1	KLKB1; HGFAC;
Down-regulated genes	Molecular function	Structural molecule activity	1	269	0.552486	0.375949	0.934129	1	1	1	AFM;
Down-regulated genes	Molecular function	Deaminase activity	1	19	0.552486	5.32004	0.173691	1	1	1	FTCD;
Down-regulated genes	Molecular function	Metallopeptidase activity	1	101	0.552486	1.00123	0.63814	1	1	1	CNDP1;
Down-regulated genes	Molecular function	G-protein coupled receptor activity	4	736	2.20994	0.545552	0.939403	1	1	1	VIPR1; NPY1R; ADRA1A; GCGR;
Down-regulated genes	Molecular function	Lyase activity	2	21	1.10497	9.57956	0.0183872	1	0.300082	1	UROC1; ALDOB;
Down-regulated genes	Molecular function	Transcription regulator activity	1	832	0.552486	0.121554	0.999806	1	1	1	THRSP;
Down-regulated genes	Molecular function	Extracellular matrix structural constituent	7	166	3.8674	4.22824	0.00141182	0.316247	0.0451782	0.247999	DCN; ECM1; OLFML3; CYR61; LUM; DPT; RSPO3;
Down-regulated genes	Molecular function	Receptor activity	7	361	3.8674	1.94435	0.0706998	1	0.791838	1	CLEC1B; CLEC4G; MARCO; LYVE1; GHR; PGLYRP2; STAB2;
Down-regulated genes	Molecular function	Glucosidase activity	1	9	0.552486	11.2246	0.0863865	1	0.879572	1	GBA3;
Down-regulated genes	Molecular function	Transcription factor activity	3	842	1.65746	0.357952	0.991393	1	1	1	FOS; EGR1; FOSB;
Down-regulated genes	Molecular function	Defense/immunity protein activity	1	61	0.552486	1.65766	0.458407	1	1	1	CD5L;
Down-regulated genes	Molecular function	Receptor signaling complex scaffold activity	1	322	0.552486	0.314071	0.961643	1	1	1	SOCS2;
Down-regulated genes	Molecular function	Calcium ion binding	2	185	1.10497	1.08787	0.553628	1	1	1	OIT3; ANXA10;
Down-regulated genes	Molecular function	Hydro-lyase activity	1	7	0.552486	14.4271	0.0678546	1	0.791838	1	SDS;
Down-regulated genes	Molecular function	Growth factor activity	2	110	1.10497	1.82953	0.300692	1	1	1	LECT2; IGF1;
Down-regulated genes	Molecular function	Binding	2	22	1.10497	9.14433	0.0200948	1	0.300082	1	HRG; APCS;
Down-regulated genes	Molecular function	Protein binding	2	182	1.10497	1.1058	0.544767	1	1	1	HRG; HHIP;
Down-regulated genes	Molecular function	RNA binding	1	366	0.552486	0.276315	0.975547	1	1	1	RCL1;
Down-regulated genes	Molecular function	Water channel activity	1	14	0.552486	7.2187	0.131129	1	1	1	AQP9;
Down-regulated genes	Molecular function	GTPase activity	1	222	0.552486	0.455538	0.893738	1	1	1	RND3;
Down-regulated genes	Molecular function	Methyltransferase activity	5	59	2.76243	8.50135	0.000304058	0.068109	0.0136218	0.0747748	BHMT; GNMT; INMT; FTCD; NNMT;
Down-regulated genes	Molecular function	Auxiliary transport protein activity	6	333	3.31492	1.80714	0.117265	1	1	1	SLCO1B3; SLC38A4; SLC10A1; SLC27A2; SLC13A5; ABCA8;
Down-regulated genes	Molecular function	Ion transporter activity	2	23	1.10497	8.74692	0.021866	1	0.306123	1	SLC22A1; SLC39A5;
Down-regulated genes	Molecular function	Complement activity	7	28	3.8674	25.06	8.74532e-09	1.95895e-06	9.79476e-07	5.37668e-06	C9; C7; C6; C8A; C8B; CRP; CFI;
Down-regulated genes	Molecular function	Cysteine-type peptidase activity	1	46	0.552486	2.19809	0.370136	1	1	1	CTH;
Down-regulated genes	Molecular function	Hormone activity	1	25	0.552486	4.04374	0.222038	1	1	1	IGF1;
Down-regulated genes	Molecular function	Peptidase activity	1	58	0.552486	1.74339	0.441797	1	1	1	PLG;
Down-regulated genes	Molecular function	Carboxyl- and carbamoyltransferase activity	1	2	0.552486	50.3154	0.0198732	1	0.300082	1	OTC;
Down-regulated genes	Molecular function	Cytokine activity	2	107	1.10497	1.88082	0.289617	1	1	1	CXCL12; PLAC8;
Down-regulated genes	Molecular function	Transmembrane receptor activity	2	52	1.10497	3.86977	0.0951373	1	0.916942	1	LIFR; IL13RA2;
Down-regulated genes	Molecular function	Deoxyribonuclease activity	1	17	0.552486	5.94556	0.156921	1	1	1	DNASE1L3;
Down-regulated genes	Molecular function	Metal ion binding	1	7	0.552486	14.4271	0.0678546	1	0.791838	1	HRG;
Down-regulated genes	Molecular function	Extracellular matrix binding	1	2	0.552486	50.3154	0.0198732	1	0.300082	1	F9;
Down-regulated genes	Molecular function	Racemase and epimerase activity	1	11	0.552486	9.18565	0.104552	1	0.936785	1	HSD17B6;
Down-regulated genes	Molecular function	Chemokine activity	2	53	1.10497	3.79677	0.0982438	1	0.916942	1	CXCL12; CXCL14;
Down-regulated genes	Molecular function	Glutathione transferase activity	1	21	0.552486	4.81361	0.19013	1	1	1	GSTZ1;
Down-regulated genes	Molecular function	Complement binding	1	3	0.552486	33.5993	0.0296621	1	0.390841	1	HRG;
Down-regulated genes	Molecular function	Immunoglobulin binding	1	2	0.552486	50.3154	0.0198732	1	0.300082	1	HRG;
Down-regulated genes	Molecular function	Polysaccharide binding	1	2	0.552486	50.3154	0.0198732	1	0.300082	1	HRG;
Down-regulated genes	Molecular function	Sulfotransferase activity	1	53	0.552486	1.90783	0.412981	1	1	1	SULT2A1;
Down-regulated genes	Biological process	Biological_process unknown	18	4731	9.94475	0.381164	1	1	1	1	CLRN3; TMEM27; FETUB; MT1G; PLAC8; TMEM45A; C8orf4; SRPX; OGDHL; COLEC10; KBTBD11; TIMD4; AMDHD1; COLEC11; WDR72; PBLD; ASPG; CCDC3;
Down-regulated genes	Biological process	Protein metabolism	11	1323	6.07735	0.833251	0.777359	1	1	1	SPP2; CNDP1; F9; PROZ; KLKB1; HGFAC; BCO2; PLG; CTH; HRSP12; APCS;
Down-regulated genes	Biological process	Metabolism	73	1683	40.3315	4.34358	3.06476e-29	5.45528e-27	2.80045e-27	1.75464e-26	CYP1A2; RDH16; GBA3; BHMT; PCK1; HAO2; CYP8B1; FBP1; CYP2C8; CYP4A11; GLS2; NAT2; ALDH8A1; GNMT; SRD5A2; CYP2E1; ADH4; AKR1D1; CYP3A4; TDO2; KMO; CYP39A1; BBOX1; CPS1; BCHE; LCAT; BCO2; IDO2; ASS1; SDS; HPD; ADH6; HSD11B1; OTC; INMT; GYS2; VNN1; ACOT12; CYP2C9; AGXT2; GLYAT; TAT; CA2; ADH1A; EPHX2; CYP26A1; MAT1A; PHGDH; AOX1; PON1; ACSM3; GSTZ1; AADAT; UROC1; HAO1; FTCD; HSD17B6; ACSL1; SULT2A1;…
Down-regulated genes	Biological process	Energy pathways	72	1633	39.779	4.41525	3.14658e-29	5.60091e-27	2.80045e-27	1.75464e-26	CYP1A2; RDH16; GBA3; BHMT; PCK1; HAO2; CYP8B1; FBP1; CYP2C8; CYP4A11; GLS2; NAT2; ALDH8A1; GNMT; SRD5A2; CYP2E1; ADH4; AKR1D1; CYP3A4; TDO2; KMO; CYP39A1; BBOX1; CPS1; BCHE; LCAT; BCO2; IDO2; ASS1; SDS; HPD; ADH6; OTC; INMT; GYS2; VNN1; ACOT12; CYP2C9; AGXT2; GLYAT; TAT; CA2; ADH1A; EPHX2; CYP26A1; MAT1A; PHGDH; AOX1; PON1; ACSM3; GSTZ1; AADAT; UROC1; HAO1; FTCD; HSD17B6; ACSL1; SULT2A1; CYP2J2; …
Down-regulated genes	Biological process	Cell growth and/or maintenance	7	1125	3.8674	0.623898	0.937488	1	1	1	AFM; DCN; ECM1; OLFML3; LUM; DPT; STAB2;
Down-regulated genes	Biological process	Transport	18	1215	9.94475	1.48418	0.0605378	1	1	1	SLCO1B3; APOF; APOA5; MT1F; MT1M; SLC38A4; CETP; MT1X; SHBG; SLC10A1; SLC27A2; SLC13A5; HPX; MT1E; APOA1; FABP1; AQP9; ABCA8;
Down-regulated genes	Biological process	Cell communication	20	3713	11.0497	0.539601	0.999751	1	1	1	CLEC1B; OIT3; CRHBP; VIPR1; CXCL12; LYVE1; GHR; CXCL14; RND3; NPY1R; LIFR; ANXA10; IGFALS; ADRA1A; SOCS2; CYR61; HHIP; IGF1; RSPO3; GCGR;
Down-regulated genes	Biological process	Signal transduction	21	3934	11.6022	0.53474	0.999865	1	1	1	CLEC1B; OIT3; CRHBP; VIPR1; CXCL12; LYVE1; GHR; CLEC4M; CXCL14; RND3; NPY1R; LIFR; ANXA10; IGFALS; ADRA1A; SOCS2; CYR61; HHIP; IGF1; RSPO3; GCGR;
Down-regulated genes	Biological process	Regulation of nucleobase, nucleoside, nucleotide and nucleic acid metabolism	7	2828	3.8674	0.248193	1	1	1	1	DNASE1L3; THRSP; FOS; EGR1; FOSB; RCL1; DPYS;
Down-regulated genes	Biological process	Regulation of cell cycle	1	57	0.552486	1.77387	0.436167	1	1	1	ADRA1A;
Down-regulated genes	Biological process	Carbohydrate metabolism	1	8	0.552486	12.6253	0.0771709	1	1	1	PDK4;
Down-regulated genes	Biological process	Amino acid and derivative metabolism	1	4	0.552486	25.2191	0.0393558	1	1	1	FTCD;
Down-regulated genes	Biological process	Immune response	19	576	10.4972	3.30449	5.24794e-06	0.000934133	0.000311378	0.00195095	FCN3; HAMP; C9; MBL2; C7; CLEC4G; MARCO; CD5L; LY6E; LECT2; C6; C8A; FCN2; PGLYRP2; C8B; AZGP1; IL13RA2; CRP; CFI;
Down-regulated genes	Biological process	Anti-apoptosis	1	32	0.552486	3.15927	0.27491	1	1	1	IGF1;
Down-regulated genes	Biological process	Ion transport	2	48	1.10497	4.19195	0.083021	1	1	1	SLC22A1; SLC39A5;
Down-regulated genes	Biological process	Apoptosis	1	220	0.552486	0.459654	0.89157	1	1	1	HRG;
Down-regulated genes	Biological process	Cell motility	1	20	0.552486	5.05389	0.181961	1	1	1	IGF1;
Down-regulated genes	Biological process	Cell proliferation	1	39	0.552486	2.59237	0.324198	1	1	1	IGF1;
Down-regulated genes	Biological process	Cell differentiation	1	29	0.552486	3.48598	0.252707	1	1	1	STEAP4;
Down-regulated genes	Biological process	Drug metabolism	1	4	0.552486	25.2191	0.0393558	1	1	1	FMO3;
Down-regulated genes	Biological process	Neurogenesis	1	7	0.552486	14.4263	0.0678583	1	1	1	GPM6A;
Down-regulated genes	Biological process	Lipid metabolism	1	33	0.552486	3.06357	0.282164	1	1	1	IGF1;
Down-regulated genes	Biological process	Wound healing	1	3	0.552486	33.5975	0.0296637	1	1	1	IGF1;
Down-regulated genes	Biological process	Muscle contraction	1	5	0.552486	20.1853	0.0489516	1	1	1	FXYD1;
Down-regulated genes	Biological pathway	Developmental Biology	1	432	0.925926	0.136149	0.999571	1	1	1	PCK1;
Down-regulated genes	Biological pathway	Platelet activation, signaling and aggregation	2	138	1.85185	0.84815	0.690823	1	1	1	IGFALS; APOA1;
Down-regulated genes	Biological pathway	Transcriptional Regulation of White Adipocyte Differentiation	1	69	0.925926	0.852308	0.699285	1	1	1	PCK1;
Down-regulated genes	Biological pathway	Amyloids	1	2	0.925926	29.2626	0.0340481	1	0.684244	1	APCS;
Down-regulated genes	Biological pathway	Hemostasis	6	375	5.55556	0.933295	0.630354	1	1	1	F9; KLKB1; PLG; IGFALS; HRG; APOA1;
Down-regulated genes	Biological pathway	Dissolution of Fibrin Clot	3	10	2.77778	17.5114	0.000541145	0.90263	0.0334307	0.194494	PLG; IGFALS; HRG;
Down-regulated genes	Biological pathway	Platelet degranulation	1	28	0.925926	2.09989	0.384913	1	1	1	APOA1;
Down-regulated genes	Biological pathway	Response to elevated platelet cytosolic Ca2+	1	39	0.925926	1.50776	0.492123	1	1	1	APOA1;
Down-regulated genes	Biological pathway	Intrinsic Pathway	3	18	2.77778	9.73285	0.00332941	1	0.146144	0.850237	F9; KLKB1; IGFALS;
Down-regulated genes	Biological pathway	Common Pathway	1	16	0.925926	3.67382	0.24228	1	1	1	IGFALS;
Down-regulated genes	Biological pathway	Formation of Fibrin Clot (Clotting Cascade)	3	33	2.77778	5.31017	0.0184843	1	0.467148	1	F9; KLKB1; IGFALS;
Down-regulated genes	Biological pathway	Extrinsic Pathway	1	5	0.925926	11.7401	0.0829781	1	1	1	F9;
Down-regulated genes	Biological pathway	Thrombin signalling through proteinase activated receptors (PARs)	1	17	0.925926	3.45784	0.255323	1	1	1	IGFALS;
Down-regulated genes	Biological pathway	Signal Transduction	5	1208	4.62963	0.241521	0.999998	1	1	1	VIPR1; CXCL12; NPY1R; ADRA1A; GCGR;
Down-regulated genes	Biological pathway	Synthesis, Secretion, and Deacylation of Ghrelin	2	16	1.85185	7.31126	0.0299662	1	0.684244	1	BCHE; IGF1;
Down-regulated genes	Biological pathway	Regulation of Insulin-like Growth Factor (IGF) Activity by Insulin-like Growth Factor Binding Proteins (IGFBPs)	2	14	1.85185	8.35498	0.0232351	1	0.569943	1	PLG; IGFALS;
Down-regulated genes	Biological pathway	Diabetes pathways	4	216	3.7037	1.08108	0.511491	1	1	1	BCHE; PLG; IGFALS; IGF1;
Down-regulated genes	Biological pathway	Chemokine receptors bind chemokines	1	42	0.925926	1.40009	0.517999	1	1	1	CXCL12;
Down-regulated genes	Biological pathway	Signaling by GPCR	5	800	4.62963	0.364695	0.998762	1	1	1	VIPR1; CXCL12; NPY1R; ADRA1A; GCGR;
Down-regulated genes	Biological pathway	GPCR ligand binding	5	336	4.62963	0.868306	0.692052	1	1	1	VIPR1; CXCL12; NPY1R; ADRA1A; GCGR;
Down-regulated genes	Biological pathway	Class A/1 (Rhodopsin-like receptors)	3	274	2.77778	0.639716	0.856439	1	1	1	CXCL12; NPY1R; ADRA1A;
Down-regulated genes	Biological pathway	Peptide ligand-binding receptors	2	167	1.85185	0.700876	0.78684	1	1	1	CXCL12; NPY1R;
Down-regulated genes	Biological pathway	GPCR downstream signaling	2	530	1.85185	0.220851	0.99924	1	1	1	ADRA1A; GCGR;
Down-regulated genes	Biological pathway	Glucagon-type ligand receptors	2	16	1.85185	7.31126	0.0299662	1	0.684244	1	VIPR1; GCGR;
Down-regulated genes	Biological pathway	G alpha (12/13) signalling events	1	21	0.925926	2.79951	0.305309	1	1	1	ADRA1A;
Down-regulated genes	Biological pathway	G alpha (q) signalling events	2	120	1.85185	0.975362	0.615169	1	1	1	ADRA1A; GCGR;
Down-regulated genes	Biological pathway	Amine ligand-binding receptors	1	36	0.925926	1.63337	0.464872	1	1	1	ADRA1A;
Down-regulated genes	Biological pathway	Adrenoceptors	1	9	0.925926	6.52806	0.144418	1	1	1	ADRA1A;
Down-regulated genes	Biological pathway	Class B/2 (Secretin family receptors)	2	47	1.85185	2.48996	0.192821	1	1	1	VIPR1; GCGR;
Down-regulated genes	Biological pathway	Immune System	11	522	10.1852	1.22828	0.282924	1	1	1	C9; MBL2; C7; GHR; FOS; C6; C8A; EGR1; C8B; SOCS2; CRP;
Down-regulated genes	Biological pathway	Pyruvate metabolism	1	10	0.925926	5.8759	0.159129	1	1	1	PDK4;
Down-regulated genes	Biological pathway	Pyruvate metabolism and Citric Acid (TCA) cycle	1	31	0.925926	1.89674	0.416197	1	1	1	PDK4;
Down-regulated genes	Biological pathway	The citric acid (TCA) cycle and respiratory electron transport	1	118	0.925926	0.498414	0.872939	1	1	1	PDK4;
Down-regulated genes	Biological pathway	Pyrimidine catabolism	2	10	1.85185	11.6936	0.0120144	1	0.371111	1	AGXT2; DPYS;
Down-regulated genes	Biological pathway	Pyrimidine metabolism	2	22	1.85185	5.31818	0.0539837	1	0.900449	1	AGXT2; DPYS;
Down-regulated genes	Biological pathway	Androgen biosynthesis	1	8	0.925926	7.34305	0.129451	1	1	1	SRD5A2;
Down-regulated genes	Biological pathway	Glucocorticoid biosynthesis	1	5	0.925926	11.7401	0.0829781	1	1	1	HSD11B1;
Down-regulated genes	Biological pathway	Amino acid and oligopeptide SLC transporters	1	48	0.925926	1.22512	0.565896	1	1	1	SLC38A4;
Down-regulated genes	Biological pathway	Bile acid and bile salt metabolism	7	27	6.48148	15.114	2.42193e-07	0.000403978	4.48864e-05	0.000261141	SLCO1B3; CYP8B1; AKR1D1; CYP39A1; SLC10A1; SLC27A2; SLC27A5;
Down-regulated genes	Biological pathway	Synthesis of bile acids and bile salts	5	19	4.62963	15.3477	1.30562e-05	0.0217777	0.00181481	0.0105582	CYP8B1; AKR1D1; CYP39A1; SLC27A2; SLC27A5;
Down-regulated genes	Biological pathway	Synthesis of bile acids and bile salts via 7alpha-hydroxycholesterol	4	15	3.7037	15.5579	9.69914e-05	0.161782	0.00851482	0.0495376	CYP8B1; AKR1D1; SLC27A2; SLC27A5;
Down-regulated genes	Biological pathway	Synthesis of bile acids and bile salts via 24-hydroxycholesterol	5	10	4.62963	29.1468	3.20133e-07	0.000533981	4.85437e-05	0.000282418	CYP8B1; AKR1D1; CYP39A1; SLC27A2; SLC27A5;
Down-regulated genes	Biological pathway	Synthesis of bile acids and bile salts via 27-hydroxycholesterol	2	6	1.85185	19.4764	0.00418863	1	0.166348	0.967783	CYP8B1; AKR1D1;
Down-regulated genes	Biological pathway	Metabolism of steroid hormones and vitamins A and D	2	32	1.85185	3.65677	0.103915	1	1	1	SRD5A2; HSD11B1;
Down-regulated genes	Biological pathway	Recycling of bile acids and salts	3	11	2.77778	15.9209	0.000734802	1	0.0422638	0.245883	SLCO1B3; SLC10A1; SLC27A5;
Down-regulated genes	Biological pathway	Alpha-oxidation of phytanate	1	4	0.925926	14.6678	0.0669473	1	1	1	SLC27A2;
Down-regulated genes	Biological pathway	Regulation of Lipid Metabolism by Peroxisome proliferator-activated receptor alpha (PPARalpha)	3	32	2.77778	5.47606	0.0170123	1	0.442191	1	CYP4A11; ACSL1; SULT2A1;
Down-regulated genes	Biological pathway	Peroxisomal lipid metabolism	2	20	1.85185	5.84974	0.0453918	1	0.861894	1	SLC27A2; ACAA1;
Down-regulated genes	Biological pathway	Synthesis of Ketone Bodies	1	4	0.925926	14.6678	0.0669473	1	1	1	HMGCS2;
Down-regulated genes	Biological pathway	Ketone body metabolism	1	5	0.925926	11.7401	0.0829781	1	1	1	HMGCS2;
Down-regulated genes	Biological pathway	Beta-oxidation of very long chain fatty acids	1	6	0.925926	9.78665	0.098736	1	1	1	ACAA1;
Down-regulated genes	Biological pathway	Metabolism	37	823	34.2593	2.61879	1.07454e-08	1.79233e-05	3.58466e-06	2.08549e-05	CYP1A2; CYP8B1; CYP2C8; CYP4A11; NAT2; CYP2E1; CYP3A4; TDO2; KMO; CYP39A1; BBOX1; CPS1; IDO2; ASS1; HPD; OTC; CYP2C9; AGXT2; GLYAT; TAT; CYP26A1; GSTZ1; AADAT; UROC1; HAO1; FTCD; SULT2A1; CYP2J2; OAT; AMDHD1; NNMT; FMO3; AGXT; PDK4; CYP2C19; DPYS; GCGR;
Down-regulated genes	Biological pathway	Metabolism of nucleotides	2	58	1.85185	2.01781	0.262659	1	1	1	AGXT2; DPYS;
Down-regulated genes	Biological pathway	Removal of aminoterminal propeptides from gamma-carboxylated proteins	2	10	1.85185	11.6936	0.0120144	1	0.371111	1	F9; PROZ;
Down-regulated genes	Biological pathway	Post-translational protein modification	2	114	1.85185	1.02669	0.587029	1	1	1	F9; PROZ;
Down-regulated genes	Biological pathway	Post-translational modification: gamma carboxylation and hypusine formation	2	14	1.85185	8.35498	0.0232351	1	0.569943	1	F9; PROZ;
Down-regulated genes	Biological pathway	Gamma-carboxylation, transport, and amino-terminal cleavage of proteins	2	12	1.85185	9.74631	0.0172317	1	0.442191	1	F9; PROZ;
Down-regulated genes	Biological pathway	Gamma-carboxylation of protein precursors	2	9	1.85185	12.9915	0.00971974	1	0.317893	1	F9; PROZ;
Down-regulated genes	Biological pathway	Transport of gamma-carboxylated protein precursors from the endoplasmic reticulum to the Golgi apparatus	2	8	1.85185	14.6134	0.00764504	1	0.273608	1	F9; PROZ;
Down-regulated genes	Biological pathway	Metabolism of proteins	2	259	1.85185	0.451926	0.941389	1	1	1	F9; PROZ;
Down-regulated genes	Biological pathway	Activated AMPK stimulates fatty-acid oxidation in muscle	1	18	0.925926	3.26584	0.268144	1	1	1	ACSL1;
Down-regulated genes	Biological pathway	Aromatic amines can be N-hydroxylated or N-dealkylated by CYP1A2	1	1	0.925926	58.2354	0.0171701	1	0.442191	1	CYP1A2;
Down-regulated genes	Biological pathway	Fatty acids	2	3	1.85185	38.8881	0.000866539	1	0.0466254	0.271258	CYP4A11; CYP2J2;
Down-regulated genes	Biological pathway	CYP2E1 reactions	1	1	0.925926	58.2354	0.0171701	1	0.442191	1	CYP2E1;
Down-regulated genes	Biological pathway	Vitamins	1	6	0.925926	9.78665	0.098736	1	1	1	CYP26A1;
Down-regulated genes	Biological pathway	FMO oxidizes nucleophiles	1	3	0.925926	19.5408	0.0506389	1	0.861894	1	FMO3;
Down-regulated genes	Biological pathway	Acetylation	1	2	0.925926	29.2626	0.0340481	1	0.684244	1	NAT2;
Down-regulated genes	Biological pathway	Cytosolic sulfonation of small molecules	1	7	0.925926	8.39056	0.114226	1	1	1	SULT2A1;
Down-regulated genes	Biological pathway	Phase II conjugation	5	39	4.62963	7.4791	0.000491916	0.820515	0.0315583	0.1836	CYP1A2; NAT2; GLYAT; SULT2A1; NNMT;
Down-regulated genes	Biological pathway	Methylation	2	6	1.85185	19.4764	0.00418863	1	0.166348	0.967783	CYP1A2; NNMT;
Down-regulated genes	Biological pathway	Bile salt and organic anion SLC transporters	1	12	0.925926	4.8974	0.187805	1	1	1	SLC13A5;
Down-regulated genes	Biological pathway	Conjugation of salicylate with glycine	1	2	0.925926	29.2626	0.0340481	1	0.684244	1	GLYAT;
Down-regulated genes	Biological pathway	Conjugation of carboxylic acids	1	3	0.925926	19.5408	0.0506389	1	0.861894	1	GLYAT;
Down-regulated genes	Biological pathway	Amino Acid conjugation	1	3	0.925926	19.5408	0.0506389	1	0.861894	1	GLYAT;
Down-regulated genes	Biological pathway	Conjugation of benzoate with glycine	1	3	0.925926	19.5408	0.0506389	1	0.861894	1	GLYAT;
Down-regulated genes	Biological pathway	Glyoxylate metabolism	3	5	2.77778	34.9878	4.80202e-05	0.0800977	0.00500611	0.0291246	AGXT2; HAO1; AGXT;
Down-regulated genes	Biological pathway	Integration of energy metabolism	1	83	0.925926	0.708563	0.764732	1	1	1	GCGR;
Down-regulated genes	Biological pathway	Carnitine synthesis	1	4	0.925926	14.6678	0.0669473	1	1	1	BBOX1;
Down-regulated genes	Biological pathway	Phenylalanine and tyrosine catabolism	3	9	2.77778	19.4549	0.000383585	0.63982	0.0255928	0.148894	HPD; TAT; GSTZ1;
Down-regulated genes	Biological pathway	Urea cycle	3	9	2.77778	19.4549	0.000383585	0.63982	0.0255928	0.148894	CPS1; ASS1; OTC;
Down-regulated genes	Biological pathway	Tryptophan catabolism	4	11	3.7037	21.2102	2.47272e-05	0.041245	0.00294607	0.0171397	TDO2; KMO; IDO2; AADAT;
Down-regulated genes	Biological pathway	Biological oxidations	16	98	14.8148	9.5128	5.45769e-12	9.10342e-09	9.10342e-09	5.2962e-08	CYP1A2; CYP8B1; CYP2C8; CYP4A11; NAT2; CYP2E1; CYP3A4; CYP39A1; CYP2C9; GLYAT; CYP26A1; SULT2A1; CYP2J2; NNMT; FMO3; CYP2C19;
Down-regulated genes	Biological pathway	Endogenous sterols	2	15	1.85185	7.79835	0.0265132	1	0.631772	1	CYP8B1; CYP39A1;
Down-regulated genes	Biological pathway	Sterols are 12-hydroxylated by CYP8B1	1	1	0.925926	58.2354	0.0171701	1	0.442191	1	CYP8B1;
Down-regulated genes	Biological pathway	Phase 1 - Functionalization of compounds	12	60	11.1111	11.6549	2.48683e-10	4.14803e-07	1.68784e-07	9.81951e-07	CYP1A2; CYP8B1; CYP2C8; CYP4A11; CYP2E1; CYP3A4; CYP39A1; CYP2C9; CYP26A1; CYP2J2; FMO3; CYP2C19;
Down-regulated genes	Biological pathway	Cytochrome P450 - arranged by substrate type	11	48	10.1852	13.355	3.03568e-10	5.06351e-07	1.68784e-07	9.81951e-07	CYP1A2; CYP8B1; CYP2C8; CYP4A11; CYP2E1; CYP3A4; CYP39A1; CYP2C9; CYP26A1; CYP2J2; CYP2C19;
Down-regulated genes	Biological pathway	Glucagon signaling in metabolic regulation	1	33	0.925926	1.78182	0.436172	1	1	1	GCGR;
Down-regulated genes	Biological pathway	Regulation of pyruvate dehydrogenase (PDH) complex	1	9	0.925926	6.52806	0.144418	1	1	1	PDK4;
Down-regulated genes	Biological pathway	Metabolism of amino acids and derivatives	18	188	16.6667	5.57853	2.13063e-09	3.55389e-06	8.88472e-07	5.16896e-06	TDO2; KMO; BBOX1; CPS1; IDO2; ASS1; HPD; OTC; AGXT2; TAT; GSTZ1; AADAT; UROC1; HAO1; FTCD; OAT; AMDHD1; AGXT;
Down-regulated genes	Biological pathway	Lysine catabolism	1	8	0.925926	7.34305	0.129451	1	1	1	AADAT;
Down-regulated genes	Biological pathway	Histidine catabolism	3	4	2.77778	43.7129	1.94516e-05	0.0324452	0.00249578	0.01452	UROC1; FTCD; AMDHD1;
Down-regulated genes	Biological pathway	Amino acid synthesis and interconversion (transamination)	1	10	0.925926	5.8759	0.159129	1	1	1	OAT;
Down-regulated genes	Biological pathway	Xenobiotics	6	14	5.55556	24.9818	5.98701e-08	9.98633e-05	1.24829e-05	7.26232e-05	CYP1A2; CYP2C8; CYP2E1; CYP3A4; CYP2C9; CYP2C19;
Down-regulated genes	Biological pathway	Glucose metabolism	1	36	0.925926	1.63337	0.464872	1	1	1	PCK1;
Down-regulated genes	Biological pathway	Glucose transport	1	38	0.925926	1.54743	0.483196	1	1	1	G6PC;
Down-regulated genes	Biological pathway	Hexose transport	1	40	0.925926	1.47008	0.500898	1	1	1	G6PC;
Down-regulated genes	Biological pathway	Metabolism of carbohydrates	3	92	2.77778	1.9051	0.209607	1	1	1	PCK1; ALDOB; G6PC;
Down-regulated genes	Biological pathway	Fatty Acyl-CoA Biosynthesis	1	18	0.925926	3.26584	0.268144	1	1	1	ACSL1;
Down-regulated genes	Biological pathway	Synthesis of very long-chain fatty acyl-CoAs	1	14	0.925926	4.19827	0.215511	1	1	1	ACSL1;
Down-regulated genes	Biological pathway	Fatty acid, triacylglycerol, and ketone body metabolism	4	83	3.7037	2.8132	0.053805	1	0.900449	1	CYP4A11; ACSL1; SULT2A1; HMGCS2;
Down-regulated genes	Biological pathway	Triglyceride Biosynthesis	1	28	0.925926	2.09989	0.384913	1	1	1	ACSL1;
Down-regulated genes	Biological pathway	Lipoprotein metabolism	4	27	3.7037	8.64584	0.00106402	1	0.0554619	0.322667	APOA5; CETP; LCAT; APOA1;
Down-regulated genes	Biological pathway	LDL-mediated lipid transport	1	4	0.925926	14.6678	0.0669473	1	1	1	CETP;
Down-regulated genes	Biological pathway	HDL-mediated lipid transport	3	15	2.77778	11.6781	0.00192732	1	0.0974172	0.566755	CETP; LCAT; APOA1;
Down-regulated genes	Biological pathway	Chylomicron-mediated lipid transport	2	16	1.85185	7.31126	0.0299662	1	0.684244	1	APOA5; APOA1;
Down-regulated genes	Biological pathway	Gluconeogenesis	1	20	0.925926	2.93942	0.293133	1	1	1	PCK1;
Down-regulated genes	Biological pathway	Fructose catabolism	1	1	0.925926	58.2354	0.0171701	1	0.442191	1	ALDOB;
Down-regulated genes	Biological pathway	Transmembrane transport of small molecules	9	378	8.33333	1.38806	0.199982	1	1	1	SLC22A1; SLCO1B3; SLC38A4; SLC13A5; APOA1; SLC39A5; AQP9; ABCA8; G6PC;
Down-regulated genes	Biological pathway	Transport of inorganic cations/anions and amino acids/oligopeptides	1	94	0.925926	0.625655	0.806072	1	1	1	SLC38A4;
Down-regulated genes	Biological pathway	SLC-mediated transmembrane transport	6	247	5.55556	1.41693	0.249869	1	1	1	SLC22A1; SLCO1B3; SLC38A4; SLC13A5; SLC39A5; G6PC;
Down-regulated genes	Biological pathway	ABC-family proteins mediated transport	2	25	1.85185	4.68026	0.0678366	1	1	1	APOA1; ABCA8;
Down-regulated genes	Biological pathway	ABCA transporters in lipid homeostasis	1	9	0.925926	6.52806	0.144418	1	1	1	APOA1;
Down-regulated genes	Biological pathway	Sodium-coupled sulphate, di- and tri-carboxylate transporters	1	5	0.925926	11.7401	0.0829781	1	1	1	SLC13A5;
Down-regulated genes	Biological pathway	Zinc transporters	1	17	0.925926	3.45784	0.255323	1	1	1	SLC39A5;
Down-regulated genes	Biological pathway	Metal ion SLC transporters	1	25	0.925926	2.35177	0.351969	1	1	1	SLC39A5;
Down-regulated genes	Biological pathway	Zinc influx into cells by the SLC39 gene family	1	10	0.925926	5.8759	0.159129	1	1	1	SLC39A5;
Down-regulated genes	Biological pathway	Amino acid transport across the plasma membrane	1	31	0.925926	1.89674	0.416197	1	1	1	SLC38A4;
Down-regulated genes	Biological pathway	Transport of glucose and other sugars, bile salts and organic acids, metal ions and amine compounds	3	94	2.77778	1.86457	0.218584	1	1	1	SLC22A1; SLC13A5; SLC39A5;
Down-regulated genes	Biological pathway	Transport of Glycerol from Adipocytes to the Liver by Aquaporins	1	2	0.925926	29.2626	0.0340481	1	0.684244	1	AQP9;
Down-regulated genes	Biological pathway	Lipid digestion, mobilization, and transport	4	46	3.7037	5.07551	0.00770958	1	0.273608	1	APOA5; CETP; LCAT; APOA1;
Down-regulated genes	Biological pathway	Metabolism of lipids and lipoproteins	18	257	16.6667	4.08085	2.84125e-07	0.00047392	4.7392e-05	0.000275718	SLCO1B3; CYP8B1; APOA5; CYP4A11; SRD5A2; AKR1D1; CYP39A1; CETP; LCAT; SLC10A1; HSD11B1; SLC27A2; ACSL1; APOA1; SULT2A1; ACAA1; HMGCS2; SLC27A5;
Down-regulated genes	Biological pathway	Organic cation/anion/zwitterion transport	1	12	0.925926	4.8974	0.187805	1	1	1	SLC22A1;
Down-regulated genes	Biological pathway	Organic cation transport	1	7	0.925926	8.39056	0.114226	1	1	1	SLC22A1;
Down-regulated genes	Biological pathway	Transport of vitamins, nucleosides, and related molecules	1	30	0.925926	1.95994	0.405948	1	1	1	SLCO1B3;
Down-regulated genes	Biological pathway	Aquaporin-mediated transport	1	27	0.925926	2.17763	0.37412	1	1	1	AQP9;
Down-regulated genes	Biological pathway	Transport of organic anions	1	10	0.925926	5.8759	0.159129	1	1	1	SLCO1B3;
Down-regulated genes	Biological pathway	Steroid hormones	2	25	1.85185	4.68026	0.0678366	1	1	1	SRD5A2; HSD11B1;
Down-regulated genes	Biological pathway	Growth hormone receptor signaling	2	18	1.85185	6.49935	0.0373693	1	0.742047	1	GHR; SOCS2;
Down-regulated genes	Biological pathway	TRIF mediated TLR3 signaling	1	56	0.925926	1.05013	0.622498	1	1	1	FOS;
Down-regulated genes	Biological pathway	Toll Like Receptor 3 (TLR3) Cascade	1	56	0.925926	1.05013	0.622498	1	1	1	FOS;
Down-regulated genes	Biological pathway	TRAF6 Mediated Induction of proinflammatory cytokines	1	50	0.925926	1.17612	0.580789	1	1	1	FOS;
Down-regulated genes	Biological pathway	Toll Like Receptor 5 (TLR5) Cascade	1	60	0.925926	0.980133	0.647992	1	1	1	FOS;
Down-regulated genes	Biological pathway	Toll Like Receptor 7/8 (TLR7/8) Cascade	1	62	0.925926	0.948521	0.660092	1	1	1	FOS;
Down-regulated genes	Biological pathway	MyD88 dependent cascade initiated on endosome	1	60	0.925926	0.980133	0.647992	1	1	1	FOS;
Down-regulated genes	Biological pathway	TRAF6 mediated induction of NFkB and MAP kinases upon TLR7/8 or 9 activation	1	59	0.925926	0.996743	0.641783	1	1	1	FOS;
Down-regulated genes	Biological pathway	Toll Like Receptor 9 (TLR9) Cascade	1	65	0.925926	0.90475	0.677473	1	1	1	FOS;
Down-regulated genes	Biological pathway	Activated TLR4 signalling	1	72	0.925926	0.8168	0.714678	1	1	1	FOS;
Down-regulated genes	Biological pathway	MyD88:Mal cascade initiated on plasma membrane	1	62	0.925926	0.948521	0.660092	1	1	1	FOS;
Down-regulated genes	Biological pathway	Toll Like Receptor 4 (TLR4) Cascade	1	76	0.925926	0.773817	0.733995	1	1	1	FOS;
Down-regulated genes	Biological pathway	NFkB and MAP kinases activation mediated by TLR4 signaling repertoire	1	54	0.925926	1.08902	0.609073	1	1	1	FOS;
Down-regulated genes	Biological pathway	MyD88-independent cascade initiated on plasma membrane	1	58	0.925926	1.01393	0.635466	1	1	1	FOS;
Down-regulated genes	Biological pathway	Innate Immune System	8	183	7.40741	2.54885	0.0130357	1	0.395336	1	C9; MBL2; C7; FOS; C6; C8A; C8B; CRP;
Down-regulated genes	Biological pathway	Toll Receptor Cascades	1	90	0.925926	0.653458	0.791947	1	1	1	FOS;
Down-regulated genes	Biological pathway	Toll Like Receptor 10 (TLR10) Cascade	1	60	0.925926	0.980133	0.647992	1	1	1	FOS;
Down-regulated genes	Biological pathway	Activation of the AP-1 family of transcription factors	1	9	0.925926	6.52806	0.144418	1	1	1	FOS;
Down-regulated genes	Biological pathway	MAPK targets/ Nuclear events mediated by MAP kinases	1	21	0.925926	2.79951	0.305309	1	1	1	FOS;
Down-regulated genes	Biological pathway	MAP kinase activation in TLR cascade	1	30	0.925926	1.95994	0.405948	1	1	1	FOS;
Down-regulated genes	Biological pathway	MyD88 cascade initiated on plasma membrane	1	59	0.925926	0.996743	0.641783	1	1	1	FOS;
Down-regulated genes	Biological pathway	Cytokine Signaling in Immune system	3	193	2.77778	0.908184	0.649684	1	1	1	GHR; EGR1; SOCS2;
Down-regulated genes	Biological pathway	Interferon alpha/beta signaling	1	77	0.925926	0.763768	0.738619	1	1	1	EGR1;
Down-regulated genes	Biological pathway	Interferon Signaling	1	98	0.925926	0.60012	0.819247	1	1	1	EGR1;
Down-regulated genes	Biological pathway	Toll Like Receptor 2 (TLR2) Cascade	1	65	0.925926	0.90475	0.677473	1	1	1	FOS;
Down-regulated genes	Biological pathway	Toll Like Receptor TLR1:TLR2 Cascade	1	64	0.925926	0.918884	0.671779	1	1	1	FOS;
Down-regulated genes	Biological pathway	Classical antibody-mediated complement activation	1	6	0.925926	9.78665	0.098736	1	1	1	CRP;
Down-regulated genes	Biological pathway	Lectin pathway of complement activation	1	3	0.925926	19.5408	0.0506389	1	0.861894	1	MBL2;
Down-regulated genes	Biological pathway	Complement cascade	7	22	6.48148	18.5475	4.99209e-08	8.32681e-05	1.18954e-05	6.92054e-05	C9; MBL2; C7; C6; C8A; C8B; CRP;
Down-regulated genes	Biological pathway	Toll Like Receptor TLR6:TLR2 Cascade	1	64	0.925926	0.918884	0.671779	1	1	1	FOS;
Down-regulated genes	Biological pathway	Creation of C4 and C2 activators	2	9	1.85185	12.9915	0.00971974	1	0.317893	1	MBL2; CRP;
Down-regulated genes	Biological pathway	Initial triggering of complement	2	15	1.85185	7.79835	0.0265132	1	0.631772	1	MBL2; CRP;
Down-regulated genes	Biological pathway	Terminal pathway of complement	5	7	4.62963	41.6205	2.78004e-08	4.6371e-05	7.7285e-06	4.49629e-05	C9; C7; C6; C8A; C8B;
Down-regulated genes	Biological pathway	fatty acid activation	2	6	1.85185	19.4764	0.00418863	1	0.166348	0.967783	SLC27A2; ACSL1;
Down-regulated genes	Biological pathway	4-hydroxybenzoate biosynthesis	1	1	0.925926	58.2354	0.0171701	1	0.442191	1	TAT;
Down-regulated genes	Biological pathway	superpathway of serine and glycine biosynthesis I	1	4	0.925926	14.6678	0.0669473	1	1	1	PHGDH;
Down-regulated genes	Biological pathway	methionine salvage II (mammalia)	1	3	0.925926	19.5408	0.0506389	1	0.861894	1	BHMT;
Down-regulated genes	Biological pathway	citrulline biosynthesis	3	8	2.77778	21.8837	0.000258955	0.431938	0.0205685	0.119663	GLS2; OTC; OAT;
Down-regulated genes	Biological pathway	arginine degradation VI (arginase 2 pathway)	1	6	0.925926	9.78665	0.098736	1	1	1	OAT;
Down-regulated genes	Biological pathway	proline biosynthesis II (from arginine)	2	5	1.85185	23.3639	0.00282403	1	0.12731	0.740667	OTC; OAT;
Down-regulated genes	Biological pathway	serine biosynthesis	1	2	0.925926	29.2626	0.0340481	1	0.684244	1	PHGDH;
Down-regulated genes	Biological pathway	arginine biosynthesis IV	3	6	2.77778	29.1662	9.48392e-05	0.158192	0.00851482	0.0495376	ASS1; OTC; OAT;
Down-regulated genes	Biological pathway	uracil degradation II (reductive)	1	3	0.925926	19.5408	0.0506389	1	0.861894	1	DPYS;
Down-regulated genes	Biological pathway	cysteine biosynthesis III (mammalia)	2	8	1.85185	14.6134	0.00764504	1	0.273608	1	MAT1A; CTH;
Down-regulated genes	Biological pathway	cysteine biosynthesis/homocysteine degradation	1	2	0.925926	29.2626	0.0340481	1	0.684244	1	CTH;
Down-regulated genes	Biological pathway	arginine degradation I (arginase pathway)	1	4	0.925926	14.6678	0.0669473	1	1	1	OAT;
Down-regulated genes	Biological pathway	glycine biosynthesis III	2	2	1.85185	58.2354	0.000292129	0.487272	0.0221487	0.128857	AGXT2; AGXT;
Down-regulated genes	Biological pathway	glycogen biosynthesis II (from UDP-D-Glucose)	1	6	0.925926	9.78665	0.098736	1	1	1	GYS2;
Down-regulated genes	Biological pathway	mevalonate pathway I	1	10	0.925926	5.8759	0.159129	1	1	1	HMGCS2;
Down-regulated genes	Biological pathway	S-adenosyl-L-methionine biosynthesis	1	3	0.925926	19.5408	0.0506389	1	0.861894	1	MAT1A;
Down-regulated genes	Biological pathway	NAD biosynthesis II (from tryptophan)	2	10	1.85185	11.6936	0.0120144	1	0.371111	1	TDO2; KMO;
Down-regulated genes	Biological pathway	superpathway of geranylgeranyldiphosphate biosynthesis I (via mevalonate)	1	13	0.925926	4.52097	0.201777	1	1	1	HMGCS2;
Down-regulated genes	Biological pathway	androgen biosynthesis	1	8	0.925926	7.34305	0.129451	1	1	1	SRD5A2;
Down-regulated genes	Biological pathway	gamma-linolenate biosynthesis II (animals)	2	7	1.85185	16.698	0.00579852	1	0.224929	1	SLC27A2; ACSL1;
Down-regulated genes	Biological pathway	stearate biosynthesis I (animals)	2	12	1.85185	9.74631	0.0172317	1	0.442191	1	SLC27A2; ACSL1;
Down-regulated genes	Biological pathway	superpathway of cholesterol biosynthesis	1	25	0.925926	2.35177	0.351969	1	1	1	HMGCS2;
Down-regulated genes	Biological pathway	bile acid biosynthesis, neutral pathway	3	9	2.77778	19.4549	0.000383585	0.63982	0.0255928	0.148894	CYP8B1; AKR1D1; SLC27A5;
Down-regulated genes	Biological pathway	L-carnitine biosynthesis	1	3	0.925926	19.5408	0.0506389	1	0.861894	1	BBOX1;
Down-regulated genes	Biological pathway	glycine betaine degradation	2	9	1.85185	12.9915	0.00971974	1	0.317893	1	BHMT; SDS;
Down-regulated genes	Biological pathway	oxidative ethanol degradation III (microsomal)	1	6	0.925926	9.78665	0.098736	1	1	1	CYP2E1;
Down-regulated genes	Biological pathway	methylglyoxal degradation III	1	3	0.925926	19.5408	0.0506389	1	0.861894	1	CYP2E1;
Down-regulated genes	Biological pathway	asparagine degradation I	1	2	0.925926	29.2626	0.0340481	1	0.684244	1	ASPG;
Down-regulated genes	Biological pathway	L-cysteine degradation II	1	1	0.925926	58.2354	0.0171701	1	0.442191	1	CTH;
Down-regulated genes	Biological pathway	glutamine degradation I	1	2	0.925926	29.2626	0.0340481	1	0.684244	1	GLS2;
Down-regulated genes	Biological pathway	histidine degradation III	3	7	2.77778	25.0055	0.000163894	0.273375	0.0136688	0.0795223	UROC1; FTCD; AMDHD1;
Down-regulated genes	Biological pathway	isoleucine degradation I	1	11	0.925926	5.34222	0.17359	1	1	1	ACAA1;
Down-regulated genes	Biological pathway	lysine degradation II	1	3	0.925926	19.5408	0.0506389	1	0.861894	1	AADAT;
Down-regulated genes	Biological pathway	lysine degradation V	1	3	0.925926	19.5408	0.0506389	1	0.861894	1	AADAT;
Down-regulated genes	Biological pathway	methionine degradation I (to homocysteine)	1	6	0.925926	9.78665	0.098736	1	1	1	MAT1A;
Down-regulated genes	Biological pathway	superpathway of methionine degradation	3	17	2.77778	10.305	0.00280934	1	0.12731	0.740667	BHMT; MAT1A; CTH;
Down-regulated genes	Biological pathway	citrulline degradation	1	1	0.925926	58.2354	0.0171701	1	0.442191	1	OTC;
Down-regulated genes	Biological pathway	phenylalanine degradation IV (mammalian, via side chain)	1	5	0.925926	11.7401	0.0829781	1	1	1	HPD;
Down-regulated genes	Biological pathway	L-serine degradation	1	2	0.925926	29.2626	0.0340481	1	0.684244	1	SDS;
Down-regulated genes	Biological pathway	tryptophan degradation to 2-amino-3-carboxymuconate semialdehyde	2	5	1.85185	23.3639	0.00282403	1	0.12731	0.740667	TDO2; KMO;
Down-regulated genes	Biological pathway	tryptophan degradation XI (mammalian, via kynurenine)	2	8	1.85185	14.6134	0.00764504	1	0.273608	1	KMO; AADAT;
Down-regulated genes	Biological pathway	tryptophan degradation III (eukaryotic)	2	9	1.85185	12.9915	0.00971974	1	0.317893	1	TDO2; KMO;
Down-regulated genes	Biological pathway	tyrosine degradation I	3	5	2.77778	34.9878	4.80202e-05	0.0800977	0.00500611	0.0291246	HPD; TAT; GSTZ1;
Down-regulated genes	Biological pathway	sucrose degradation	1	7	0.925926	8.39056	0.114226	1	1	1	ALDOB;
Down-regulated genes	Biological pathway	acetone degradation I (to methylglyoxal)	1	7	0.925926	8.39056	0.114226	1	1	1	CYP2E1;
Down-regulated genes	Biological pathway	fatty acid beta-oxidation I	3	19	2.77778	9.22087	0.00390471	1	0.166348	0.967783	SLC27A2; ACSL1; ACAA1;
Down-regulated genes	Biological pathway	thymine degradation	1	3	0.925926	19.5408	0.0506389	1	0.861894	1	DPYS;
Down-regulated genes	Biological pathway	urea cycle	3	6	2.77778	29.1662	9.48392e-05	0.158192	0.00851482	0.0495376	CPS1; ASS1; OTC;
Down-regulated genes	Biological pathway	glutathione-mediated detoxification	1	19	0.925926	3.09405	0.280746	1	1	1	GSTZ1;
Down-regulated genes	Biological pathway	nicotine degradation II	3	11	2.77778	15.9209	0.000734802	1	0.0422638	0.245883	INMT; AOX1; FMO3;
Down-regulated genes	Biological pathway	nicotine degradation III	1	6	0.925926	9.78665	0.098736	1	1	1	AOX1;
Down-regulated genes	Biological pathway	D-glucuronate degradation I	1	2	0.925926	29.2626	0.0340481	1	0.684244	1	DCXR;
Down-regulated genes	Biological pathway	TCA cycle variation III (eukaryotic)	1	13	0.925926	4.52097	0.201777	1	1	1	OGDHL;
Down-regulated genes	Biological pathway	Wnt signaling network	1	200	0.925926	0.294074	0.97041	1	1	1	CYR61;
Down-regulated genes	Biological pathway	Beta2 integrin cell surface interactions	1	28	0.925926	2.09989	0.384913	1	1	1	CYR61;
Down-regulated genes	Biological pathway	Osteopontin-mediated events	1	29	0.925926	2.0275	0.395521	1	1	1	FOS;
Down-regulated genes	Biological pathway	Regulation of cytoplasmic and nuclear SMAD2/3 signaling	2	305	1.85185	0.383769	0.970631	1	1	1	FOS; EGR1;
Down-regulated genes	Biological pathway	ErbB2/ErbB3 signaling events	1	38	0.925926	1.54743	0.483196	1	1	1	FOS;
Down-regulated genes	Biological pathway	Validated targets of C-MYC transcriptional repression	1	63	0.925926	0.933468	0.665986	1	1	1	HMGCS2;
Down-regulated genes	Biological pathway	IL6-mediated signaling events	2	47	1.85185	2.48996	0.192821	1	1	1	FOS; CRP;
Down-regulated genes	Biological pathway	Signaling events mediated by the Hedgehog family	1	65	0.925926	0.90475	0.677473	1	1	1	HHIP;
Down-regulated genes	Biological pathway	Integrins in angiogenesis	2	64	1.85185	1.82867	0.301022	1	1	1	FOS; IGF1;
Down-regulated genes	Biological pathway	Syndecan-1-mediated signaling events	13	1297	12.037	0.584146	0.993378	1	1	1	DCN; VIPR1; CXCL12; FOS; PLG; EGR1; IL13RA2; CYR61; CRP; IGF1; HMGCS2; FOSB; G6PC;
Down-regulated genes	Biological pathway	Downstream signaling in na&#xef;ve CD8+ T cells	2	65	1.85185	1.80054	0.307394	1	1	1	FOS; EGR1;
Down-regulated genes	Biological pathway	Regulation of CDC42 activity	8	768	7.40741	0.60737	0.961897	1	1	1	DCN; VIPR1; CXCL12; FOS; EGR1; CYR61; CRP; FOSB;
Down-regulated genes	Biological pathway	Notch-mediated HES/HEY network	1	94	0.925926	0.625655	0.806072	1	1	1	GHR;
Down-regulated genes	Biological pathway	Glypican pathway	13	1335	12.037	0.567519	0.995641	1	1	1	DCN; VIPR1; CXCL12; FOS; PLG; EGR1; IL13RA2; CYR61; CRP; IGF1; HMGCS2; FOSB; G6PC;
Down-regulated genes	Biological pathway	GMCSF-mediated signaling events	13	1289	12.037	0.587771	0.992782	1	1	1	DCN; VIPR1; CXCL12; FOS; PLG; EGR1; IL13RA2; CYR61; CRP; IGF1; HMGCS2; FOSB; G6PC;
Down-regulated genes	Biological pathway	Insulin Pathway	13	1285	12.037	0.589601	0.992466	1	1	1	DCN; VIPR1; CXCL12; FOS; PLG; EGR1; IL13RA2; CYR61; CRP; IGF1; HMGCS2; FOSB; G6PC;
Down-regulated genes	Biological pathway	C-MYC pathway	1	149	0.925926	0.394724	0.926589	1	1	1	HMGCS2;
Down-regulated genes	Biological pathway	Stabilization and expansion of the E-cadherin adherens junction	3	275	2.77778	0.63739	0.858142	1	1	1	FOS; CYR61; IGF1;
Down-regulated genes	Biological pathway	FOXA transcription factor networks	6	81	5.55556	4.32039	0.00254842	1	0.125022	0.727357	PCK1; FOS; TAT; APOA1; ALDOB; G6PC;
Down-regulated genes	Biological pathway	Glypican 3 network	1	206	0.925926	0.285509	0.973423	1	1	1	CYR61;
Down-regulated genes	Biological pathway	Nectin adhesion pathway	13	1292	12.037	0.586407	0.993011	1	1	1	DCN; VIPR1; CXCL12; FOS; PLG; EGR1; IL13RA2; CYR61; CRP; IGF1; HMGCS2; FOSB; G6PC;
Down-regulated genes	Biological pathway	FGF signaling pathway	1	48	0.925926	1.22512	0.565896	1	1	1	FOS;
Down-regulated genes	Biological pathway	Neurotrophic factor-mediated Trk receptor signaling	2	101	1.85185	1.15883	0.521036	1	1	1	FOS; EGR1;
Down-regulated genes	Biological pathway	TRAIL signaling pathway	13	1325	12.037	0.571802	0.995127	1	1	1	DCN; VIPR1; CXCL12; FOS; PLG; EGR1; IL13RA2; CYR61; CRP; IGF1; HMGCS2; FOSB; G6PC;
Down-regulated genes	Biological pathway	LPA receptor mediated events	1	100	0.925926	0.588119	0.825498	1	1	1	FOS;
Down-regulated genes	Biological pathway	IGF1 pathway	13	1288	12.037	0.588228	0.992704	1	1	1	DCN; VIPR1; CXCL12; FOS; PLG; EGR1; IL13RA2; CYR61; CRP; IGF1; HMGCS2; FOSB; G6PC;
Down-regulated genes	Biological pathway	ATF-2 transcription factor network	1	59	0.925926	0.996743	0.641783	1	1	1	FOS;
Down-regulated genes	Biological pathway	HIF-1-alpha transcription factor network	2	66	1.85185	1.77327	0.313755	1	1	1	CXCL12; FOS;
Down-regulated genes	Biological pathway	CDC42 signaling events	8	755	7.40741	0.617827	0.956476	1	1	1	DCN; VIPR1; CXCL12; FOS; EGR1; CYR61; CRP; FOSB;
Down-regulated genes	Biological pathway	Signaling events mediated by Hepatocyte Growth Factor Receptor (c-Met)	13	1290	12.037	0.587316	0.992859	1	1	1	DCN; VIPR1; CXCL12; FOS; PLG; EGR1; IL13RA2; CYR61; CRP; IGF1; HMGCS2; FOSB; G6PC;
Down-regulated genes	Biological pathway	Glypican 1 network	13	1296	12.037	0.584597	0.993306	1	1	1	DCN; VIPR1; CXCL12; FOS; PLG; EGR1; IL13RA2; CYR61; CRP; IGF1; HMGCS2; FOSB; G6PC;
Down-regulated genes	Biological pathway	N-cadherin signaling events	2	251	1.85185	0.466329	0.93408	1	1	1	FOS; CYR61;
Down-regulated genes	Biological pathway	Fc-epsilon receptor I signaling in mast cells	1	61	0.925926	0.964068	0.654094	1	1	1	FOS;
Down-regulated genes	Biological pathway	PDGF receptor signaling network	13	1290	12.037	0.587316	0.992859	1	1	1	DCN; VIPR1; CXCL12; FOS; PLG; EGR1; IL13RA2; CYR61; CRP; IGF1; HMGCS2; FOSB; G6PC;
Down-regulated genes	Biological pathway	Integrin family cell surface interactions	13	1375	12.037	0.551009	0.997234	1	1	1	DCN; VIPR1; CXCL12; FOS; PLG; EGR1; IL13RA2; CYR61; CRP; IGF1; HMGCS2; FOSB; G6PC;
Down-regulated genes	Biological pathway	IL1-mediated signaling events	2	234	1.85185	0.500206	0.915626	1	1	1	FOS; EGR1;
Down-regulated genes	Biological pathway	Calcineurin-regulated NFAT-dependent transcription in lymphocytes	2	49	1.85185	2.38835	0.205372	1	1	1	FOS; EGR1;
Down-regulated genes	Biological pathway	S1P2 pathway	1	26	0.925926	2.26135	0.36314	1	1	1	FOS;
Down-regulated genes	Biological pathway	Regulation of Telomerase	1	68	0.925926	0.86484	0.693973	1	1	1	FOS;
Down-regulated genes	Biological pathway	Internalization of ErbB1	13	1285	12.037	0.589601	0.992466	1	1	1	DCN; VIPR1; CXCL12; FOS; PLG; EGR1; IL13RA2; CYR61; CRP; IGF1; HMGCS2; FOSB; G6PC;
Down-regulated genes	Biological pathway	TGF-beta receptor signaling	2	305	1.85185	0.383769	0.970631	1	1	1	FOS; EGR1;
Down-regulated genes	Biological pathway	FOXA2 and FOXA3 transcription factor networks	5	43	4.62963	6.78353	0.000778844	1	0.0433037	0.251933	PCK1; TAT; APOA1; ALDOB; G6PC;
Down-regulated genes	Biological pathway	Posttranslational regulation of adherens junction stability and dissassembly	2	231	1.85185	0.506702	0.911907	1	1	1	FOS; CYR61;
Down-regulated genes	Biological pathway	BCR signaling pathway	1	67	0.925926	0.877747	0.688568	1	1	1	FOS;
Down-regulated genes	Biological pathway	Signaling events mediated by TCPTP	1	92	0.925926	0.639254	0.799133	1	1	1	IL13RA2;
Down-regulated genes	Biological pathway	Signaling events mediated by VEGFR1 and VEGFR2	13	1293	12.037	0.585953	0.993086	1	1	1	DCN; VIPR1; CXCL12; FOS; PLG; EGR1; IL13RA2; CYR61; CRP; IGF1; HMGCS2; FOSB; G6PC;
Down-regulated genes	Biological pathway	Beta1 integrin cell surface interactions	13	1348	12.037	0.562046	0.996233	1	1	1	DCN; VIPR1; CXCL12; FOS; PLG; EGR1; IL13RA2; CYR61; CRP; IGF1; HMGCS2; FOSB; G6PC;
Down-regulated genes	Biological pathway	Urokinase-type plasminogen activator (uPA) and uPAR-mediated signaling	13	1285	12.037	0.589601	0.992466	1	1	1	DCN; VIPR1; CXCL12; FOS; PLG; EGR1; IL13RA2; CYR61; CRP; IGF1; HMGCS2; FOSB; G6PC;
Down-regulated genes	Biological pathway	Ras signaling in the CD4+ TCR pathway	1	42	0.925926	1.40009	0.517999	1	1	1	FOS;
Down-regulated genes	Biological pathway	TCR signaling in na&#xef;ve CD8+ T cells	2	127	1.85185	0.921606	0.646139	1	1	1	FOS; EGR1;
Down-regulated genes	Biological pathway	Ceramide signaling pathway	1	49	0.925926	1.20012	0.573407	1	1	1	IGF1;
Down-regulated genes	Biological pathway	IFN-gamma pathway	13	1293	12.037	0.585953	0.993086	1	1	1	DCN; VIPR1; CXCL12; FOS; PLG; EGR1; IL13RA2; CYR61; CRP; IGF1; HMGCS2; FOSB; G6PC;
Down-regulated genes	Biological pathway	Regulation of RAC1 activity	2	205	1.85185	0.570964	0.872737	1	1	1	FOS; CYR61;
Down-regulated genes	Biological pathway	PAR1-mediated thrombin signaling events	13	1296	12.037	0.584597	0.993306	1	1	1	DCN; VIPR1; CXCL12; FOS; PLG; EGR1; IL13RA2; CYR61; CRP; IGF1; HMGCS2; FOSB; G6PC;
Down-regulated genes	Biological pathway	IL12 signaling mediated by STAT4	1	29	0.925926	2.0275	0.395521	1	1	1	FOS;
Down-regulated genes	Biological pathway	Beta3 integrin cell surface interactions	1	43	0.925926	1.36754	0.526331	1	1	1	CYR61;
Down-regulated genes	Biological pathway	Noncanonical Wnt signaling pathway	1	182	0.925926	0.323157	0.959187	1	1	1	CYR61;
Down-regulated genes	Biological pathway	Regulation of p38-alpha and p38-beta	2	164	1.85185	0.713696	0.778266	1	1	1	FOS; EGR1;
Down-regulated genes	Biological pathway	PDGFR-beta signaling pathway	13	1285	12.037	0.589601	0.992466	1	1	1	DCN; VIPR1; CXCL12; FOS; PLG; EGR1; IL13RA2; CYR61; CRP; IGF1; HMGCS2; FOSB; G6PC;
Down-regulated genes	Biological pathway	Canonical Wnt signaling pathway	1	155	0.925926	0.379445	0.934006	1	1	1	CYR61;
Down-regulated genes	Biological pathway	E-cadherin signaling in the nascent adherens junction	3	275	2.77778	0.63739	0.858142	1	1	1	FOS; CYR61; IGF1;
Down-regulated genes	Biological pathway	Integrin-linked kinase signaling	8	654	7.40741	0.71324	0.886538	1	1	1	DCN; VIPR1; CXCL12; FOS; EGR1; CYR61; CRP; FOSB;
Down-regulated genes	Biological pathway	Regulation of nuclear beta catenin signaling and target gene transcription	1	135	0.925926	0.435655	0.905918	1	1	1	CYR61;
Down-regulated genes	Biological pathway	p38 MAPK signaling pathway	2	189	1.85185	0.619297	0.84132	1	1	1	FOS; EGR1;
Down-regulated genes	Biological pathway	EGF receptor (ErbB1) signaling pathway	13	1285	12.037	0.589601	0.992466	1	1	1	DCN; VIPR1; CXCL12; FOS; PLG; EGR1; IL13RA2; CYR61; CRP; IGF1; HMGCS2; FOSB; G6PC;
Down-regulated genes	Biological pathway	p75(NTR)-mediated signaling	3	178	2.77778	0.984713	0.59462	1	1	1	FOS; PLG; EGR1;
Down-regulated genes	Biological pathway	Thrombin/protease-activated receptor (PAR) pathway	13	1297	12.037	0.584146	0.993378	1	1	1	DCN; VIPR1; CXCL12; FOS; PLG; EGR1; IL13RA2; CYR61; CRP; IGF1; HMGCS2; FOSB; G6PC;
Down-regulated genes	Biological pathway	Class I PI3K signaling events	13	1285	12.037	0.589601	0.992466	1	1	1	DCN; VIPR1; CXCL12; FOS; PLG; EGR1; IL13RA2; CYR61; CRP; IGF1; HMGCS2; FOSB; G6PC;
Down-regulated genes	Biological pathway	Arf6 signaling events	13	1285	12.037	0.589601	0.992466	1	1	1	DCN; VIPR1; CXCL12; FOS; PLG; EGR1; IL13RA2; CYR61; CRP; IGF1; HMGCS2; FOSB; G6PC;
Down-regulated genes	Biological pathway	Plasma membrane estrogen receptor signaling	13	1298	12.037	0.583696	0.99345	1	1	1	DCN; VIPR1; CXCL12; FOS; PLG; EGR1; IL13RA2; CYR61; CRP; IGF1; HMGCS2; FOSB; G6PC;
Down-regulated genes	Biological pathway	FoxO family signaling	1	49	0.925926	1.20012	0.573407	1	1	1	G6PC;
Down-regulated genes	Biological pathway	IL2-mediated signaling events	2	115	1.85185	1.01777	0.591821	1	1	1	FOS; SOCS2;
Down-regulated genes	Biological pathway	FAS (CD95) signaling pathway	1	130	0.925926	0.45241	0.897215	1	1	1	IGF1;
Down-regulated genes	Biological pathway	C-MYB transcription factor network	1	84	0.925926	0.700129	0.768826	1	1	1	LECT2;
Down-regulated genes	Biological pathway	FOXM1 transcription factor network	1	42	0.925926	1.40009	0.517999	1	1	1	FOS;
Down-regulated genes	Biological pathway	IL3-mediated signaling events	13	1292	12.037	0.586407	0.993011	1	1	1	DCN; VIPR1; CXCL12; FOS; PLG; EGR1; IL13RA2; CYR61; CRP; IGF1; HMGCS2; FOSB; G6PC;
Down-regulated genes	Biological pathway	AP-1 transcription factor network	8	621	7.40741	0.751141	0.849566	1	1	1	DCN; VIPR1; CXCL12; FOS; EGR1; CYR61; CRP; FOSB;
Down-regulated genes	Biological pathway	Hypoxic and oxygen homeostasis regulation of HIF-1-alpha	2	80	1.85185	1.46298	0.400945	1	1	1	CXCL12; FOS;
Down-regulated genes	Biological pathway	amb2 Integrin signaling	1	40	0.925926	1.47008	0.500898	1	1	1	PLG;
Down-regulated genes	Biological pathway	Glucocorticoid receptor signaling	3	85	2.77778	2.06198	0.178926	1	1	1	VIPR1; FOS; EGR1;
Down-regulated genes	Biological pathway	mTOR signaling pathway	13	1285	12.037	0.589601	0.992466	1	1	1	DCN; VIPR1; CXCL12; FOS; PLG; EGR1; IL13RA2; CYR61; CRP; IGF1; HMGCS2; FOSB; G6PC;
Down-regulated genes	Biological pathway	RAC1 signaling pathway	2	205	1.85185	0.570964	0.872737	1	1	1	FOS; CYR61;
Down-regulated genes	Biological pathway	ErbB receptor signaling network	13	1308	12.037	0.579233	0.994125	1	1	1	DCN; VIPR1; CXCL12; FOS; PLG; EGR1; IL13RA2; CYR61; CRP; IGF1; HMGCS2; FOSB; G6PC;
Down-regulated genes	Biological pathway	Signaling events mediated by focal adhesion kinase	13	1285	12.037	0.589601	0.992466	1	1	1	DCN; VIPR1; CXCL12; FOS; PLG; EGR1; IL13RA2; CYR61; CRP; IGF1; HMGCS2; FOSB; G6PC;
Down-regulated genes	Biological pathway	VEGF and VEGFR signaling network	13	1301	12.037	0.58235	0.993659	1	1	1	DCN; VIPR1; CXCL12; FOS; PLG; EGR1; IL13RA2; CYR61; CRP; IGF1; HMGCS2; FOSB; G6PC;
Down-regulated genes	Biological pathway	Glucocorticoid receptor regulatory network	3	80	2.77778	2.19083	0.157859	1	1	1	VIPR1; FOS; EGR1;
Down-regulated genes	Biological pathway	Alpha9 beta1 integrin signaling events	13	1302	12.037	0.581903	0.993728	1	1	1	DCN; VIPR1; CXCL12; FOS; PLG; EGR1; IL13RA2; CYR61; CRP; IGF1; HMGCS2; FOSB; G6PC;
Down-regulated genes	Biological pathway	Syndecan-2-mediated signaling events	1	77	0.925926	0.763768	0.738619	1	1	1	FOS;
Down-regulated genes	Biological pathway	ALK1 pathway	2	324	1.85185	0.361264	0.978073	1	1	1	FOS; EGR1;
Down-regulated genes	Biological pathway	Arf6 downstream pathway	13	1285	12.037	0.589601	0.992466	1	1	1	DCN; VIPR1; CXCL12; FOS; PLG; EGR1; IL13RA2; CYR61; CRP; IGF1; HMGCS2; FOSB; G6PC;
Down-regulated genes	Biological pathway	JNK signaling in the CD4+ TCR pathway	1	42	0.925926	1.40009	0.517999	1	1	1	FOS;
Down-regulated genes	Biological pathway	Role of Calcineurin-dependent NFAT signaling in lymphocytes	2	95	1.85185	1.23201	0.488327	1	1	1	FOS; EGR1;
Down-regulated genes	Biological pathway	IL4-mediated signaling events	1	62	0.925926	0.948521	0.660092	1	1	1	IL13RA2;
Down-regulated genes	Biological pathway	Validated transcriptional targets of AP1 family members Fra1 and Fra2	3	134	2.77778	1.30803	0.405672	1	1	1	DCN; FOS; EGR1;
Down-regulated genes	Biological pathway	CXCR4-mediated signaling events	2	190	1.85185	0.616037	0.843471	1	1	1	CXCL12; FOS;
Down-regulated genes	Biological pathway	S1P1 pathway	13	1285	12.037	0.589601	0.992466	1	1	1	DCN; VIPR1; CXCL12; FOS; PLG; EGR1; IL13RA2; CYR61; CRP; IGF1; HMGCS2; FOSB; G6PC;
Down-regulated genes	Biological pathway	FOXA1 transcription factor network	1	44	0.925926	1.33646	0.53452	1	1	1	FOS;
Down-regulated genes	Biological pathway	ATM pathway	1	307	0.925926	0.191583	0.995712	1	1	1	SULT2A1;
Down-regulated genes	Biological pathway	TNF receptor signaling pathway	3	299	2.77778	0.58623	0.894068	1	1	1	FOS; EGR1; IGF1;
Down-regulated genes	Biological pathway	ErbB1 downstream signaling	13	1285	12.037	0.589601	0.992466	1	1	1	DCN; VIPR1; CXCL12; FOS; PLG; EGR1; IL13RA2; CYR61; CRP; IGF1; HMGCS2; FOSB; G6PC;
Down-regulated genes	Biological pathway	EGFR-dependent Endothelin signaling events	13	1286	12.037	0.589142	0.992546	1	1	1	DCN; VIPR1; CXCL12; FOS; PLG; EGR1; IL13RA2; CYR61; CRP; IGF1; HMGCS2; FOSB; G6PC;
Down-regulated genes	Biological pathway	Syndecan-4-mediated signaling events	3	209	2.77778	0.838662	0.70242	1	1	1	CXCL12; PLG; CYR61;
Down-regulated genes	Biological pathway	Nongenotropic Androgen signaling	2	26	1.85185	4.50032	0.0726893	1	1	1	SHBG; FOS;
Down-regulated genes	Biological pathway	Regulation of nuclear SMAD2/3 signaling	2	305	1.85185	0.383769	0.970631	1	1	1	FOS; EGR1;
Down-regulated genes	Biological pathway	ALK1 signaling events	2	321	1.85185	0.36464	0.977032	1	1	1	FOS; EGR1;
Down-regulated genes	Biological pathway	PDGFR-alpha signaling pathway	1	21	0.925926	2.79951	0.305309	1	1	1	FOS;
Down-regulated genes	Biological pathway	Angiopoietin receptor Tie2-mediated signaling	1	50	0.925926	1.17612	0.580789	1	1	1	PLG;
Down-regulated genes	Biological pathway	Arf6 trafficking events	13	1285	12.037	0.589601	0.992466	1	1	1	DCN; VIPR1; CXCL12; FOS; PLG; EGR1; IL13RA2; CYR61; CRP; IGF1; HMGCS2; FOSB; G6PC;
Down-regulated genes	Biological pathway	E-cadherin signaling events	3	280	2.77778	0.626009	0.866397	1	1	1	FOS; CYR61; IGF1;
Down-regulated genes	Biological pathway	Androgen-mediated signaling	3	130	2.77778	1.34827	0.387018	1	1	1	SHBG; FOS; EGR1;
Down-regulated genes	Biological pathway	Endothelins	13	1304	12.037	0.58101	0.993863	1	1	1	DCN; VIPR1; CXCL12; FOS; PLG; EGR1; IL13RA2; CYR61; CRP; IGF1; HMGCS2; FOSB; G6PC;
Down-regulated genes	Biological pathway	Beta5 beta6 beta7 and beta8 integrin cell surface interactions	1	17	0.925926	3.45784	0.255323	1	1	1	CYR61;
Down-regulated genes	Biological pathway	Presenilin action in Notch and Wnt signaling	1	46	0.925926	1.27837	0.550479	1	1	1	FOS;
Down-regulated genes	Biological pathway	TCR signaling in na&#xef;ve CD4+ T cells	1	133	0.925926	0.442206	0.902528	1	1	1	FOS;
Down-regulated genes	Biological pathway	Notch signaling pathway	1	94	0.925926	0.625655	0.806072	1	1	1	GHR;
Down-regulated genes	Biological pathway	E2F transcription factor network	1	73	0.925926	0.805613	0.719634	1	1	1	SULT2A1;
Down-regulated genes	Biological pathway	IL5-mediated signaling events	13	1289	12.037	0.587771	0.992782	1	1	1	DCN; VIPR1; CXCL12; FOS; PLG; EGR1; IL13RA2; CYR61; CRP; IGF1; HMGCS2; FOSB; G6PC;
Down-regulated genes	Biological pathway	IL12-mediated signaling events	1	111	0.925926	0.529842	0.856238	1	1	1	FOS;
Down-regulated genes	Biological pathway	Sphingosine 1-phosphate (S1P) pathway	13	1308	12.037	0.579233	0.994125	1	1	1	DCN; VIPR1; CXCL12; FOS; PLG; EGR1; IL13RA2; CYR61; CRP; IGF1; HMGCS2; FOSB; G6PC;
Down-regulated genes	Biological pathway	Regulation of Androgen receptor activity	1	108	0.925926	0.544559	0.848431	1	1	1	EGR1;
Down-regulated genes	Biological pathway	Proteoglycan syndecan-mediated signaling events	13	1342	12.037	0.564558	0.99597	1	1	1	DCN; VIPR1; CXCL12; FOS; PLG; EGR1; IL13RA2; CYR61; CRP; IGF1; HMGCS2; FOSB; G6PC;
Down-regulated genes	Biological pathway	Calcium signaling in the CD4+ TCR pathway	1	29	0.925926	2.0275	0.395521	1	1	1	FOS;
Down-regulated genes	Biological pathway	BMP receptor signaling	2	226	1.85185	0.517912	0.905371	1	1	1	FOS; EGR1;
Down-regulated genes	Biological pathway	RhoA signaling pathway	2	205	1.85185	0.570964	0.872737	1	1	1	FOS; CYR61;
Down-regulated genes	Biological pathway	Class I PI3K signaling events mediated by Akt	13	1285	12.037	0.589601	0.992466	1	1	1	DCN; VIPR1; CXCL12; FOS; PLG; EGR1; IL13RA2; CYR61; CRP; IGF1; HMGCS2; FOSB; G6PC;
Down-regulated genes	Biological pathway	LKB1 signaling events	13	1305	12.037	0.580565	0.993929	1	1	1	DCN; VIPR1; CXCL12; FOS; PLG; EGR1; IL13RA2; CYR61; CRP; IGF1; HMGCS2; FOSB; G6PC;
Down-regulated genes	Biological pathway	Regulation of RhoA activity	2	205	1.85185	0.570964	0.872737	1	1	1	FOS; CYR61;
Down-regulated genes	Biological pathway	Signaling events mediated by PRL	1	23	0.925926	2.55618	0.329041	1	1	1	EGR1;
Down-regulated genes	Biological pathway	Trk receptor signaling mediated by the MAPK pathway	2	34	1.85185	3.44173	0.115014	1	1	1	FOS; EGR1;
Down-regulated genes	Biological pathway	Trk receptor signaling mediated by PI3K and PLC-gamma	2	63	1.85185	1.85769	0.294641	1	1	1	FOS; EGR1;
Down-regulated genes	Biological pathway	Hedgehog	1	16	0.925926	3.67382	0.24228	1	1	1	HHIP;
Down-regulated genes	Biological pathway	TGFBR	2	125	1.85185	0.936351	0.637494	1	1	1	FOS; FOSB;
Down-regulated genes	Biological pathway	EGFR1	1	138	0.925926	0.426185	0.910785	1	1	1	FOS;
Down-regulated genes	Biological pathway	Mesenchymal-to-epithelial transition	2	223	1.85185	0.524879	0.901236	1	1	1	FBP1; AZGP1;
Down-regulated genes	Biological pathway	Epithelial-to-mesenchymal transition	6	185	5.55556	1.89176	0.0978753	1	1	1	DCN; CXCL12; SRPX; OLFML3; DPT; IGF1;
