# Supplementary material for: Based on Integrated Bioinformatics Analysis Identification of Biomarkers in Hepatocellular Carcinoma Patients from Different Regions
Source: Biomed Res Int. 2019 Oct 28;2019:1742341. doi: 10.1155/2019/1742341 (PMC6925735; doi:10.1155/2019/1742341)
Supplement: Supplementary Materials — Supplementary Table S1: information for the DEGs. Supplementary Table S2: enrichment analysis of the DEGs. Supplementary Table S3: node information for PPI network. Supplementary Table S4: pathway analysis of network modules. Supplementary Table S5: univariate Cox regression analysis of the prognosis of the top 20 genes in PPI. [file 1742341.f1.zip › 1742341.f1/Supplementary Table S3.xlsx]

## Sheet: string_interactions.tsv default
Supplementary Table S3 node information for PPI network
Shared name	Category	Degree	AverageShortestPathLength	BetweennessCentrality	ClosenessCentrality	ClusteringCoefficient	MCODE_Cluster	MCODE_Score
FOXM1	Up-regulated gene	44	2.52119	0.0755412	0.396639	0.775899	Cluster 1	33.5412
CCNA2	Up-regulated gene	43	2.69492	0.0192496	0.371069	0.887043	Cluster 1	34.2317
AURKA	Up-regulated gene	43	2.95763	0.0106011	0.338109	0.881506	Cluster 1	34.2317
CDKN3	Up-regulated gene	43	2.75	0.0247991	0.363636	0.882614	Cluster 1	34.2317
CDC20	Up-regulated gene	42	3.00847	0.0028044	0.332394	0.923345	Cluster 1	34.2317
BUB1B	Up-regulated gene	42	2.72034	0.0203586	0.367601	0.924506	Cluster 1	34.2317
CDC6	Up-regulated gene	42	3.01271	0.0118075	0.331927	0.923345	Cluster 1	34.2317
CCNB1	Up-regulated gene	42	2.86864	0.0074926	0.348597	0.925668	Cluster 1	34.2317
PTTG1	Up-regulated gene	42	2.75424	0.0118212	0.363077	0.926829	Cluster 1	34.2317
UBE2C	Up-regulated gene	42	2.86441	0.0105537	0.349112	0.923345	Cluster 1	34.2317
TOP2A	Up-regulated gene	42	2.84322	0.0173426	0.351714	0.923345	Cluster 1	34.2317
HMMR	Up-regulated gene	42	2.98729	0.0263425	0.334752	0.881533	Cluster 1	34.7511
TTK	Up-regulated gene	42	3.02542	0.00110851	0.330532	0.924506	Cluster 1	34.2317
PBK	Up-regulated gene	42	2.99576	0.0149639	0.333805	0.923345	Cluster 1	34.2317
NUSAP1	Up-regulated gene	42	3.02542	0.00853883	0.330532	0.923345	Cluster 1	34.2317
MKI67	Up-regulated gene	42	2.75424	0.0118212	0.363077	0.926829	Cluster 1	34.2317
TPX2	Up-regulated gene	41	3.02966	6.425e-05	0.33007	0.969512	Cluster 1	34.2317
CCNB2	Up-regulated gene	41	3.02966	6.425e-05	0.33007	0.969512	Cluster 1	34.2317
DLGAP5	Up-regulated gene	41	3.02966	6.425e-05	0.33007	0.969512	Cluster 1	34.2317
NDC80	Up-regulated gene	41	2.70339	0.044829	0.369906	0.926829	Cluster 1	34.6221
RFC4	Up-regulated gene	41	2.97458	0.0160495	0.336182	0.889024	Cluster 1	34.4167
CENPF	Up-regulated gene	41	3.02966	6.425e-05	0.33007	0.969512	Cluster 1	34.2317
NCAPG	Up-regulated gene	41	3.02966	6.425e-05	0.33007	0.969512	Cluster 1	34.2317
ASPM	Up-regulated gene	41	3.02966	6.425e-05	0.33007	0.969512	Cluster 1	34.2317
DTL	Up-regulated gene	41	3.02966	6.425e-05	0.33007	0.969512	Cluster 1	34.2317
MELK	Up-regulated gene	41	3.02966	6.425e-05	0.33007	0.969512	Cluster 1	34.2317
RRM2	Up-regulated gene	41	3.02966	6.425e-05	0.33007	0.969512	Cluster 1	34.2317
RACGAP1	Up-regulated gene	40	3.0339	5.546e-05	0.329609	0.976923	Cluster 1	34.2317
KIF20A	Up-regulated gene	40	3.0339	5.034e-05	0.329609	0.974359	Cluster 1	34.6221
KIF4A	Up-regulated gene	40	3.0339	5.034e-05	0.329609	0.974359	Cluster 1	34.6221
PRC1	Up-regulated gene	40	3.0339	5.546e-05	0.329609	0.976923	Cluster 1	34.2317
CDCA5	Up-regulated gene	40	3.0339	4.884e-05	0.329609	0.974359	Cluster 1	34.6221
MCM2	Up-regulated gene	39	3.03814	5.042e-05	0.329149	0.978408	Cluster 1	34.8949
MCM3	Up-regulated gene	39	3.00847	0.00663148	0.332394	0.929825	Cluster 1	33.946
NUF2	Up-regulated gene	39	3.03814	4.005e-05	0.329149	0.982456	Cluster 1	34.6221
ANLN	Up-regulated gene	39	3.03814	4.155e-05	0.329149	0.982456	Cluster 1	34.6221
NEK2	Up-regulated gene	38	3.04237	3.946e-05	0.328691	0.97724	Cluster 1	33.946
UBE2T	Up-regulated gene	37	3.08898	1.786e-05	0.323731	0.987988	Cluster 1	33.946
GMNN	Up-regulated gene	36	3.09322	3.012e-05	0.323288	0.979365	Cluster 1	31.943
CCNE2	Up-regulated gene	36	3.11017	2.642e-05	0.321526	0.98254	Cluster 1	31.4715
FAM83D	Up-regulated gene	35	3.07203	1.05e-05	0.325517	0.996639	Cluster 1	34
E2F8	Up-regulated gene	34	3.06356	3.218e-05	0.326418	0.98574	Cluster 1	30.5832
HAO1	Down-regulated gene	14	2.86017	0.00722478	0.34963	0.351648	Cluster 10	5
GNPAT	Up-regulated gene	7	3.23305	0.00076189	0.309305	0.571429	Cluster 10	5
SLC27A2	Down-regulated gene	10	3.08475	0.00148934	0.324176	0.511111	Cluster 10	5
LUM	Down-regulated gene	6	3.36864	0.00261984	0.296855	0.333333	Cluster 11	3
COL4A1	Up-regulated gene	6	3.51271	0.00241037	0.28468	0.266667	Cluster 11	3
COL15A1	Up-regulated gene	4	3.89407	0.00847458	0.256801	0.5	Cluster 11	3
IGFALS	Down-regulated gene	8	2.82627	0.0121368	0.353823	0.214286	Cluster 12	3
GHR	Down-regulated gene	5	2.99153	0.00049169	0.334278	0.5	Cluster 12	3
SOCS2	Down-regulated gene	4	3.11441	0.00016857	0.321088	0.666667	Cluster 12	3
FTCD	Down-regulated gene	35	2.52119	0.0393868	0.396639	0.284034	Cluster 2	9.84848
HRG	Down-regulated gene	32	2.38136	0.0418189	0.419929	0.320565	Cluster 2	9.84848
AGXT	Down-regulated gene	29	2.52542	0.0332597	0.395973	0.231527	Cluster 2	8
C8A	Down-regulated gene	27	2.7161	0.0121165	0.368175	0.407407	Cluster 2	9.84848
TAT	Down-regulated gene	27	2.43644	0.0530275	0.410435	0.188034	Cluster 2	8
CYP3A4	Down-regulated gene	27	2.29237	0.0845164	0.436229	0.242165	Cluster 2	8
FETUB	Down-regulated gene	27	2.64831	0.0154039	0.3776	0.410256	Cluster 2	9.84848
MBL2	Down-regulated gene	24	2.77119	0.024577	0.360856	0.405797	Cluster 2	9.84848
SPP2	Down-regulated gene	24	2.50424	0.0295136	0.399323	0.40942	Cluster 2	9.84848
F9	Down-regulated gene	24	2.63983	0.0157803	0.378812	0.373188	Cluster 2	9.84848
HAO2	Down-regulated gene	21	2.73729	0.0152361	0.365325	0.3	Cluster 2	8
CYP2C9	Down-regulated gene	19	2.66525	0.0105389	0.375199	0.421053	Cluster 2	8
CYP2E1	Down-regulated gene	19	2.80085	0.0129777	0.357035	0.304094	Cluster 2	8
KLKB1	Down-regulated gene	19	2.77542	0.00901672	0.360305	0.549708	Cluster 2	9.84848
ALDH8A1	Down-regulated gene	19	2.83051	0.0142556	0.353293	0.415205	Cluster 2	9
KMO	Down-regulated gene	18	2.82203	0.0154807	0.354354	0.352941	Cluster 2	8
C9	Down-regulated gene	17	2.87288	0.00418606	0.348083	0.492647	Cluster 2	8
C6	Down-regulated gene	17	2.91102	0.00286022	0.343523	0.654412	Cluster 2	9.84848
C8B	Down-regulated gene	16	2.99153	0.00200727	0.334278	0.6	Cluster 2	10
CYP1A2	Down-regulated gene	16	2.76271	0.00728072	0.361963	0.491667	Cluster 2	8
FMO3	Down-regulated gene	15	2.72034	0.0229109	0.367601	0.380952	Cluster 2	8
HGFAC	Down-regulated gene	15	2.87288	0.00172532	0.348083	0.742857	Cluster 2	10
CYP2C8	Down-regulated gene	14	2.90254	0.00201152	0.344526	0.593407	Cluster 2	8
CYP4A11	Down-regulated gene	14	2.79661	0.00597699	0.357576	0.505495	Cluster 2	8
CYP2C19	Down-regulated gene	13	2.9322	0.00161016	0.34104	0.615385	Cluster 2	8
PROZ	Down-regulated gene	12	3.02542	0.00012905	0.330532	0.939394	Cluster 2	9.84848
ACSM3	Down-regulated gene	12	2.88136	0.0216962	0.347059	0.545455	Cluster 2	8
CYP2J2	Down-regulated gene	9	3.02966	0.00041287	0.33007	0.888889	Cluster 2	8
AFP	Up-regulated gene	26	2.24576	0.0903498	0.445283	0.187692	Cluster 3	7
PLG	Down-regulated gene	23	2.43644	0.0534374	0.410435	0.245059	Cluster 3	5.78571
CRP	Down-regulated gene	23	2.55508	0.032261	0.391376	0.252964	Cluster 3	6
FABP1	Down-regulated gene	22	2.47881	0.0331504	0.403419	0.238095	Cluster 3	6
SPP1	Up-regulated gene	21	2.45763	0.0385972	0.406897	0.27619	Cluster 3	7
APOA5	Down-regulated gene	20	2.65678	0.0111187	0.376396	0.357895	Cluster 3	7
LPA	Down-regulated gene	17	2.65254	0.00752393	0.376997	0.382353	Cluster 3	5.78571
PON1	Down-regulated gene	14	2.75	0.00727405	0.363636	0.384615	Cluster 3	5.78571
GPC3	Up-regulated gene	13	2.64831	0.0203769	0.3776	0.371795	Cluster 3	7
CYR61	Down-regulated gene	13	2.77966	0.0166362	0.359756	0.397436	Cluster 3	7
LCAT	Down-regulated gene	10	2.84322	0.00406024	0.351714	0.444444	Cluster 3	5.78571
CETP	Down-regulated gene	9	3.09746	0.00179825	0.322845	0.555556	Cluster 3	5.78571
LAMC1	Up-regulated gene	8	2.89407	0.00163842	0.345534	0.785714	Cluster 3	7
APOF	Down-regulated gene	6	3.25	0	0.307692	1	Cluster 3	6
MT1G	Down-regulated gene	6	3.64407	0.00486837	0.274419	0.8	Cluster 4	3.42857
MT1X	Down-regulated gene	5	3.64831	0.00208258	0.2741	0.9	Cluster 4	3.73333
MT1E	Down-regulated gene	6	3.64407	0.00486837	0.274419	0.8	Cluster 4	3.42857
MT1F	Down-regulated gene	6	3.64407	0.00486837	0.274419	0.8	Cluster 4	3.42857
MT1M	Down-regulated gene	4	4.62712	0	0.216117	1	Cluster 4	4
SLC39A5	Down-regulated gene	5	4.62288	9.02e-06	0.216315	0.9	Cluster 4	3.73333
APOA1	Down-regulated gene	28	2.47881	0.0273593	0.403419	0.291005	Cluster 5	3.61053
APCS	Down-regulated gene	9	3.0678	0.00325442	0.325967	0.555556	Cluster 5	3.88889
HPX	Down-regulated gene	15	2.7161	0.013214	0.368175	0.371429	Cluster 5	3.54545
AFM	Down-regulated gene	13	2.77966	0.00530986	0.359756	0.397436	Cluster 5	3.77778
AZGP1	Down-regulated gene	7	2.70763	0.0124702	0.369327	0.333333	Cluster 5	4
FCN2	Down-regulated gene	5	3.35169	0.00111274	0.298357	0.8	Cluster 6	4
FCN3	Down-regulated gene	5	3.35169	0.00111274	0.298357	0.8	Cluster 6	4
COLEC11	Down-regulated gene	4	3.75424	0	0.266366	1	Cluster 6	4
COLEC10	Down-regulated gene	4	3.75424	0	0.266366	1	Cluster 6	4
CPS1	Down-regulated gene	6	3.51271	0.00010355	0.28468	0.6	Cluster 7	2.14286
AGXT2	Down-regulated gene	14	3	0.0193886	0.333333	0.252747	Cluster 7	2.10909
OAT	Down-regulated gene	12	2.82203	0.00397948	0.354354	0.409091	Cluster 7	2.18182
GLS2	Down-regulated gene	8	2.96186	0.00356107	0.337625	0.392857	Cluster 7	1.82143
DPYS	Down-regulated gene	9	3.16102	0.00213354	0.316354	0.333333	Cluster 7	1.82143
ASS1	Down-regulated gene	17	2.85593	0.011864	0.350148	0.220588	Cluster 8	3.46667
OTC	Down-regulated gene	9	3.0678	0.00392424	0.325967	0.361111	Cluster 8	3.46667
MAT1A	Down-regulated gene	8	2.73305	0.0180114	0.365891	0.357143	Cluster 8	3.46667
CTH	Down-regulated gene	14	2.80085	0.00796642	0.357035	0.296703	Cluster 8	4.28571
HPD	Down-regulated gene	10	2.74576	0.00955368	0.364198	0.311111	Cluster 9	3.04762
BHMT	Down-regulated gene	12	2.77119	0.0050875	0.360856	0.318182	Cluster 9	2.85714
HMGCS2	Down-regulated gene	20	2.61017	0.0161479	0.383117	0.242105	Cluster 9	3.36364
FBP1	Down-regulated gene	12	3.02542	0.00352902	0.330532	0.30303	Cluster 9	3.42857
ALDOB	Down-regulated gene	14	2.64831	0.017539	0.3776	0.230769	Cluster 9	3
PCK1	Down-regulated gene	22	2.69915	0.0290767	0.370487	0.21645	Cluster 9	2.82051
FDPS	Up-regulated gene	10	2.97034	0.0115529	0.336662	0.0888889	Cluster 9	3
FOS	Down-regulated gene	12	2.62288	0.0404273	0.38126	0.212121		4
EGR1	Down-regulated gene	6	2.94915	0.00203013	0.33908	0.533333		4
TDO2	Down-regulated gene	8	2.79661	0.00401232	0.357576	0.357143		1.5
IDO2	Down-regulated gene	11	2.97881	0.0110829	0.335704	0.4		6
UROC1	Down-regulated gene	7	3.13559	0.00045686	0.318919	0.47619		1.82143
AMDHD1	Down-regulated gene	4	3.24576	0.00054961	0.308094	0.5		3
AADAT	Down-regulated gene	7	3.2161	0.00102513	0.310935	0.285714		3
FOSB	Down-regulated gene	3	3.42797	0	0.291718	1		3
CXCL12	Down-regulated gene	11	2.90254	0.0353318	0.344526	0.218182		4
CCL20	Up-regulated gene	5	3.19492	0.00378905	0.312997	0.4		1.2
IGF1	Down-regulated gene	24	2.33475	0.0862934	0.428312	0.177536		1.41176
NAT2	Down-regulated gene	7	3	0.00068922	0.333333	0.714286		6
ACAA1	Down-regulated gene	13	2.85169	0.018007	0.350669	0.230769		3.73333
STAB2	Down-regulated gene	5	3.79237	0.0220449	0.263687	0.1		2
LYVE1	Down-regulated gene	3	3.41102	0.00714184	0.293168	0.333333		2
EPHX2	Down-regulated gene	10	3.15254	0.00370159	0.317204	0.444444		2.72727
ADH1A	Down-regulated gene	3	3.57627	2.303e-05	0.279621	0.666667		1.66667
SRD5A2	Down-regulated gene	6	3	0.00143063	0.333333	0.4		2.7
HSD17B6	Down-regulated gene	7	2.86864	0.00301257	0.348597	0.428571		2.4
AKR1D1	Down-regulated gene	9	3.12712	0.00410557	0.319783	0.111111		3
ADH4	Down-regulated gene	8	3.04661	0.00808759	0.328234	0.178571		3
CYP8B1	Down-regulated gene	12	2.77542	0.00814104	0.360305	0.212121		1.25455
NNMT	Down-regulated gene	4	3.01271	0.0136873	0.331927	0		0.4
AOX1	Down-regulated gene	19	2.67797	0.0326956	0.373418	0.239766		7
RDH16	Down-regulated gene	4	3.55085	0.00068686	0.281623	0.666667		3
CYP26A1	Down-regulated gene	14	2.88983	0.0154356	0.346041	0.285714		6
HSD11B1	Down-regulated gene	6	2.83475	0.00261572	0.352765	0.2		1.4
SDS	Down-regulated gene	12	2.82203	0.00559518	0.354354	0.333333		2.66667
ACSL1	Down-regulated gene	10	3.01695	0.00386669	0.331461	0.333333		3.73333
DCN	Down-regulated gene	10	2.94915	0.020746	0.33908	0.311111		4
ENO3	Down-regulated gene	5	3.26271	0.00019356	0.306494	0.6		4
SQLE	Up-regulated gene	6	3.2839	0.00094022	0.304516	0.466667		1.85714
ADH6	Down-regulated gene	5	3.23305	0.00084345	0.309305	0.3		1.4
GNMT	Down-regulated gene	10	2.86017	0.00997344	0.34963	0.2		1.71429
NPY1R	Down-regulated gene	4	3.41525	0.00558958	0.292804	0.166667		2
ROBO1	Up-regulated gene	3	3.74576	0.00592804	0.266968	0		0.5
INMT	Down-regulated gene	1	3.97458	0	0.251599	0		0
DKK1	Up-regulated gene	6	3	0.00803704	0.333333	0.466667		2.4
C7	Down-regulated gene	9	3.14407	0.00170797	0.318059	0.555556		4.7619
AKR1B10	Up-regulated gene	7	3.01271	0.00719045	0.331927	0.142857		1.4
DCXR	Down-regulated gene	2	3.70339	5.315e-05	0.270023	0		0.666667
SULT2A1	Down-regulated gene	15	2.68644	0.0110958	0.37224	0.247619		2.10909
HAMP	Down-regulated gene	5	3.09746	0.00271317	0.322845	0.4		3
LCN2	Up-regulated gene	10	2.85593	0.0348203	0.350148	0.155556		3
SHBG	Down-regulated gene	9	2.87712	0.00501199	0.34757	0.416667		3.2381
ECM1	Down-regulated gene	5	3.33898	0.00288758	0.299492	0		0.333333
GCGR	Down-regulated gene	4	3.27542	0.00460395	0.305304	0.166667		2
ADRA1A	Down-regulated gene	3	3.26695	0.0011016	0.306096	0		0.5
VIPR1	Down-regulated gene	3	3.71186	0.00249929	0.269406	0		0.5
DPT	Down-regulated gene	4	2.95763	0.00449614	0.338109	0.333333		1.66667
CAP2	Up-regulated gene	2	4.32627	0.00038101	0.231146	0		0.666667
OGDHL	Down-regulated gene	3	3.29661	0.00011922	0.303342	0.333333		2
ILF2	Up-regulated gene	5	3.15678	0.0193774	0.316779	0.2		1.2
LY6E	Down-regulated gene	1	4.83898	0	0.206655	0		0
VNN1	Down-regulated gene	2	3.84322	0.00847458	0.260198	0		0.666667
G6PC	Down-regulated gene	18	2.53814	0.0255416	0.39399	0.222222		2.32727
CLIC1	Up-regulated gene	7	2.77966	0.0019212	0.359756	0.428571		2.4
SLCO1B3	Down-regulated gene	8	3.06356	0.00014117	0.326418	0.785714		4.16667
SLC10A1	Down-regulated gene	14	2.63983	0.0224194	0.378812	0.252747		3.14286
CNDP1	Down-regulated gene	4	3.61017	0.00029808	0.276995	0.333333		1.66667
ACSL4	Up-regulated gene	5	3.32203	0.0001729	0.30102	0.8		4
FLVCR1	Up-regulated gene	2	3.63983	0	0.274738	1		2
PHGDH	Down-regulated gene	7	2.84322	0.0177181	0.351714	0.285714		2.2
CXCL14	Down-regulated gene	2	3.83475	0	0.260773	1		2
SLC22A1	Down-regulated gene	6	3.15678	4.374e-05	0.316779	0.866667		5
CYP39A1	Down-regulated gene	5	3.36864	0.00109831	0.296855	0.3		1.4
BCHE	Down-regulated gene	6	2.76271	0.00312562	0.361963	0.333333		2.7
CD5L	Down-regulated gene	3	3.15254	0.00016176	0.317204	0.666667		1.66667
TIMD4	Down-regulated gene	2	4.17797	0.0033369	0.239351	0		0.666667
SLC27A5	Down-regulated gene	7	3.05932	0.00335611	0.32687	0.285714		1.71429
SRXN1	Up-regulated gene	3	3.44915	7.481e-05	0.289926	0.666667		1.66667
NQO1	Up-regulated gene	15	2.67797	0.064362	0.373418	0.209524		5
GSTZ1	Down-regulated gene	3	3.26271	0.00039192	0.306494	0.333333		2
CA2	Down-regulated gene	4	3.02966	0.00236426	0.33007	0.166667		2
GYS2	Down-regulated gene	13	2.94492	0.00360067	0.339568	0.346154		5
PDK4	Down-regulated gene	6	3.16525	0.00016225	0.31593	0.666667		4
SULT1C2	Up-regulated gene	9	2.97458	0.00203246	0.336182	0.444444		5
IGF2BP2	Up-regulated gene	1	4.00847	0	0.249471	0		0
HRSP12	Down-regulated gene	2	3.65678	9.99e-06	0.273465	0		0.666667
AKR7A3	Down-regulated gene	3	3.51271	0.00056763	0.28468	0.333333		2
MOGAT2	Down-regulated gene	5	3.29661	0.0018617	0.303342	0.1		2
CCDC3	Down-regulated gene	1	4.88983	0	0.204506	0		0
ASPG	Down-regulated gene	5	3.10593	0.00112569	0.321965	0.4		3
HHIP	Down-regulated gene	2	3.58898	0.00026966	0.27863	0		0.666667
CFI	Down-regulated gene	9	3.36864	0.00183032	0.296855	0.416667		4.7619
MDK	Up-regulated gene	4	3.12288	0.00494288	0.320217	0.5		3
TOMM40L	Up-regulated gene	5	3.59746	0	0.277974	1		5
STEAP4	Down-regulated gene	2	3.64407	7.431e-05	0.274419	0		0.666667
CLEC4M	Down-regulated gene	1	4.78814	0	0.20885	0		0
CLRN3	Down-regulated gene	2	1	1	1	0		0.666667
C8orf4	Down-regulated gene	1	1.5	0	0.666667	0		0
RBM24	Up-regulated gene	3	3.95339	0.00476534	0.252947	0		0.5
S100P	Up-regulated gene	1	4.02119	0	0.248683	0		0
CLGN	Up-regulated gene	2	3.7839	0.00648845	0.264278	0		0.666667
PZP	Down-regulated gene	2	3.39407	6.351e-05	0.294632	0		0.666667
IGF2BP3	Up-regulated gene	3	2.99576	0.00082946	0.333805	0.333333		2
OLFML3	Down-regulated gene	2	3.83898	0	0.260486	1		2
RSPO3	Down-regulated gene	2	3.79661	0.00106671	0.263393	0		0.666667
SRPX	Down-regulated gene	7	3.19492	0.0412257	0.312997	0		0.25
CLEC1B	Down-regulated gene	2	4.1822	0.00847458	0.239108	0		0.666667
REG3A	Up-regulated gene	1	3.85169	0	0.259626	0		0
RRAGD	Up-regulated gene	1	4.19068	0	0.238625	0		0
THRSP	Down-regulated gene	2	3.57203	7.814e-05	0.279953	0		0.666667
RND3	Down-regulated gene	1	3.77542	0	0.264871	0		0
TBCE	Up-regulated gene	2	3.56356	0.0108868	0.280618	0		0.666667
GPM6A	Down-regulated gene	1	3.97034	0	0.251868	0		0
BCO2	Down-regulated gene	2	3.88136	0	0.257642	1		2
CRHBP	Down-regulated gene	1	4.19068	0	0.238625	0		0
GLYAT	Down-regulated gene	2	3.26695	1.549e-05	0.306096	0		0.666667
MARCO	Down-regulated gene	1	4.78814	0	0.20885	0		0
KBTBD11	Down-regulated gene	1	4.15254	0	0.240816	0		0
IGJ	Down-regulated gene	1	3.24153	0	0.308497	0		0
SPINK1	Up-regulated gene	1	3.82203	0	0.261641	0		0
CLEC4G	Down-regulated gene	1	5.17797	0	0.193126	0		0
MUC13	Up-regulated gene	1	1.5	0	0.666667	0		0
TMEM45A	Down-regulated gene	1	3.64407	0	0.274419	0		0
