# Supplementary material for: Based on Integrated Bioinformatics Analysis Identification of Biomarkers in Hepatocellular Carcinoma Patients from Different Regions
Source: Biomed Res Int. 2019 Oct 28;2019:1742341. doi: 10.1155/2019/1742341 (PMC6925735; doi:10.1155/2019/1742341)
Supplement: Supplementary Materials — Supplementary Table S1: information for the DEGs. Supplementary Table S2: enrichment analysis of the DEGs. Supplementary Table S3: node information for PPI network. Supplementary Table S4: pathway analysis of network modules. Supplementary Table S5: univariate Cox regression analysis of the prognosis of the top 20 genes in PPI. [file 1742341.f1.zip › 1742341.f1/Supplementary Table S4.xlsx]

## Sheet: Sheet1
Supplementary Table S4 pathway analysis of network modules
Group	Biological pathway	No. of genes in the dataset	No. of genes in the background dataset	Percentage of genes	Fold enrichment	P-value (Hypergeometric test)	Bonferroni method	BH method	Q-value (Storey-Tibshirani method)	genes mapped (from input data set)
module 1	Vif-mediated degradation of APOBEC3G	1	69	3.44828	3.17331	0.274286	1	1	1	UBE2C;
module 1	Developmental Biology	1	432	3.44828	0.50691	0.873588	1	1	1	KIF4A;
module 1	Vpu mediated degradation of CD4	1	67	3.44828	3.26802	0.267474	1	1	1	UBE2C;
module 1	Axon guidance	1	219	3.44828	0.99991	0.643004	1	1	1	KIF4A;
module 1	Recycling pathway of L1	1	32	3.44828	6.84131	0.137779	1	1	1	KIF4A;
module 1	L1CAM interactions	1	79	3.44828	2.77168	0.307439	1	1	1	KIF4A;
module 1	Hemostasis	2	375	6.89655	1.16214	0.523055	1	1	1	RACGAP1; KIF4A;
module 1	APC-Cdc20 mediated degradation of Nek2A	4	23	13.7931	37.786	3.03807e-06	0.0050675	0.000298088	0.00187145	CDC20; BUB1B; NEK2; UBE2C;
module 1	Mitotic Telophase /Cytokinesis	2	18	6.89655	24.1984	0.00300007	1	0.0905437	0.568449	KIF20A; UBE2C;
module 1	Mitotic Metaphase/Anaphase Transition	1	22	3.44828	9.94958	0.0968222	1	1	1	UBE2C;
module 1	Mitotic Prometaphase	6	99	20.6897	13.1613	4.62667e-06	0.00771728	0.000428738	0.00269169	CDC20; BUB1B; UBE2C; NDC80; NUF2; CENPF;
module 1	Mitotic Prophase	1	62	3.44828	3.53153	0.250173	1	1	1	NEK2;
module 1	Golgi Cisternae Pericentriolar Stack Reorganization	1	62	3.44828	3.53153	0.250173	1	1	1	NEK2;
module 1	Mitotic M-M/G1 phases	12	242	41.3793	10.76	2.33048e-10	3.88723e-07	1.29574e-07	8.13491e-07	CDC20; BUB1B; MCM2; CDC6; NEK2; KIF20A; MCM3; UBE2C; NDC80; NUF2; CENPF; GMNN;
module 1	M Phase	8	158	27.5862	10.9914	3.63965e-07	0.000607094	5.51904e-05	0.000346495	CDC20; BUB1B; NEK2; KIF20A; UBE2C; NDC80; NUF2; CENPF;
module 1	DNA Replication	13	261	44.8276	10.8075	3.01553e-11	5.02991e-08	2.51495e-08	1.57893e-07	CDC20; BUB1B; MCM2; CDC6; NEK2; KIF20A; MCM3; UBE2C; NDC80; NUF2; RFC4; CENPF; GMNN;
module 1	Factors involved in megakaryocyte development and platelet production	2	119	6.89655	3.66198	0.103564	1	1	1	RACGAP1; KIF4A;
module 1	Kinesins	2	21	6.89655	20.7431	0.00408263	1	0.113497	0.712555	RACGAP1; KIF4A;
module 1	Inactivation of APC/C via direct inhibition of the APC/C complex	3	18	10.3448	36.2373	6.86499e-05	0.114508	0.00369381	0.0231904	CDC20; BUB1B; UBE2C;
module 1	Inhibition of the proteolytic activity of APC/C required for the onset of anaphase by mitotic spindle checkpoint components	3	18	10.3448	36.2373	6.86499e-05	0.114508	0.00369381	0.0231904	CDC20; BUB1B; UBE2C;
module 1	Host Interactions of HIV factors	1	141	3.44828	1.55301	0.482611	1	1	1	UBE2C;
module 1	HIV Infection	1	203	3.44828	1.07872	0.61462	1	1	1	UBE2C;
module 1	Signal Transduction	1	1208	3.44828	0.181282	0.99797	1	1	1	UBE2C;
module 1	CDC6 association with the ORC:origin complex	1	11	3.44828	19.8901	0.0496009	1	1	1	CDC6;
module 1	Assembly of the pre-replicative complex	5	83	17.2414	13.0861	3.28123e-05	0.0547309	0.00210504	0.0132158	MCM2; CDC6; MCM3; UBE2C; GMNN;
module 1	DNA Replication Pre-Initiation	5	98	17.2414	11.0833	7.31521e-05	0.122018	0.00369751	0.0232136	MCM2; CDC6; MCM3; UBE2C; GMNN;
module 1	M/G1 Transition	5	98	17.2414	11.0833	7.31521e-05	0.122018	0.00369751	0.0232136	MCM2; CDC6; MCM3; UBE2C; GMNN;
module 1	Autodegradation of Cdh1 by Cdh1:APC/C	1	60	3.44828	3.64923	0.243143	1	1	1	UBE2C;
module 1	APC/C:Cdc20 mediated degradation of Cyclin B	4	22	13.7931	39.5028	2.51772e-06	0.00419956	0.000262473	0.00164785	CDC20; CCNB1; PTTG1; UBE2C;
module 1	APC/C:Cdc20 mediated degradation of Securin	3	66	10.3448	9.88691	0.00331812	1	0.0970986	0.609602	CDC20; PTTG1; UBE2C;
module 1	Conversion from APC/C:Cdc20 to APC/C:Cdh1 in late anaphase	2	16	6.89655	27.2213	0.00236648	1	0.0744771	0.46758	CDC20; UBE2C;
module 1	APC/C:Cdh1 mediated degradation of Cdc20 and other APC/C:Cdh1 targeted proteins in late mitosis/early G1	4	69	13.7931	12.599	0.000256166	0.427285	0.0106821	0.0670643	CDC20; AURKA; PTTG1; UBE2C;
module 1	Loss of Nlp from mitotic centrosomes	1	61	3.44828	3.58942	0.246666	1	1	1	NEK2;
module 1	Regulation of mitotic cell cycle	6	81	20.6897	16.0857	1.41848e-06	0.00236603	0.000157735	0.00099029	CDC20; AURKA; BUB1B; CCNB1; PTTG1; UBE2C;
module 1	Recruitment of NuMA to mitotic centrosomes	1	12	3.44828	18.234	0.0539903	1	1	1	CCNB1;
module 1	Loss of proteins required for interphase microtubule organizationÃÂ from the centrosome	1	61	3.44828	3.58942	0.246666	1	1	1	NEK2;
module 1	Phosphorylation of Emi1	3	20	10.3448	32.6154	9.53147e-05	0.158985	0.00441625	0.027726	CDC20; CCNB1; UBE2C;
module 1	APC/C-mediated degradation of cell cycle proteins	6	81	20.6897	16.0857	1.41848e-06	0.00236603	0.000157735	0.00099029	CDC20; AURKA; BUB1B; CCNB1; PTTG1; UBE2C;
module 1	Regulation of APC/C activators between G1/S and early anaphase	4	78	13.7931	11.1455	0.000410728	0.685094	0.0152243	0.0955809	CDC20; BUB1B; CCNB1; UBE2C;
module 1	APC/C:Cdc20 mediated degradation of mitotic proteins	5	71	17.2414	15.2975	1.52895e-05	0.0255028	0.00121442	0.00762435	CDC20; BUB1B; CCNB1; PTTG1; UBE2C;
module 1	Phosphorylation of the APC/C	2	18	6.89655	24.1984	0.00300007	1	0.0905437	0.568449	CCNB1; UBE2C;
module 1	Activation of APC/C and APC/C:Cdc20 mediated degradation of mitotic proteins	5	72	17.2414	15.0851	1.6378e-05	0.0273186	0.00124175	0.00779595	CDC20; BUB1B; CCNB1; PTTG1; UBE2C;
module 1	SCF-beta-TrCP mediated degradation of Emi1	2	70	6.89655	6.225	0.0408588	1	0.959895	1	CDC20; UBE2C;
module 1	Ubiquitin-dependent degradation of Cyclin D	1	66	3.44828	3.31753	0.264045	1	1	1	UBE2C;
module 1	Ubiquitin-dependent degradation of Cyclin D1	1	66	3.44828	3.31753	0.264045	1	1	1	UBE2C;
module 1	Mitotic G2-G2/M phases	5	99	17.2414	10.9714	7.67971e-05	0.128098	0.00376758	0.0236535	CCNA2; CCNB2; CCNB1; NEK2; UBE2C;
module 1	G2/M Transition	5	96	17.2414	11.3142	6.62642e-05	0.110529	0.00369381	0.0231904	CCNA2; CCNB2; CCNB1; NEK2; UBE2C;
module 1	Cyclin A/B1 associated events during G2/M transition	3	14	10.3448	46.5835	3.10057e-05	0.0517176	0.0020687	0.0129877	CCNA2; CCNB2; CCNB1;
module 1	Phosphorylation of proteins involved in the G2/M transition by Cyclin A:Cdc2 complexes	1	3	3.44828	72.7543	0.01377	1	0.364577	1	CCNA2;
module 1	Cyclin B2 mediated events	2	6	6.89655	72.5146	0.000304395	0.50773	0.0120888	0.0758957	CCNB2; CCNB1;
module 1	Polo-like kinase mediated events	1	18	3.44828	12.1594	0.0799191	1	1	1	UBE2C;
module 1	Recruitment of mitotic centrosome proteins and complexes	2	70	6.89655	6.225	0.0408588	1	0.959895	1	CCNB1; NEK2;
module 1	Centrosome maturation	2	70	6.89655	6.225	0.0408588	1	0.959895	1	CCNB1; NEK2;
module 1	E2F-enabled inhibition of pre-replication complex formation	1	10	3.44828	21.8772	0.0451917	1	1	1	CCNB1;
module 1	E2F mediated regulation of DNA replication	3	28	10.3448	23.3001	0.000267193	0.445677	0.0108702	0.0682449	CDC6; CCNB1; RRM2;
module 1	G1/S-Specific Transcription	2	15	6.89655	29.0348	0.00207659	1	0.0666108	0.418194	CDC6; RRM2;
module 1	Phosphorylation of proteins involved in G1/S transition by active Cyclin E:Cdk2 complexes	1	4	3.44828	54.6111	0.0183192	1	0.477443	1	CCNE2;
module 1	SCF(Skp2)-mediated degradation of p27/p21	1	67	3.44828	3.26802	0.267474	1	1	1	UBE2C;
module 1	Cyclin E associated events during G1/S transition	2	78	6.89655	5.58662	0.0496758	1	1	1	UBE2C; CCNE2;
module 1	G1/S Transition	7	117	24.1379	12.9897	7.15778e-07	0.00119392	9.94931e-05	0.000624636	MCM2; CDC6; CCNB1; MCM3; UBE2C; CCNE2; RRM2;
module 1	S Phase	5	121	17.2414	8.97677	0.000198938	0.331828	0.00850841	0.0534173	MCM2; CDC6; MCM3; UBE2C; RFC4;
module 1	Cyclin A:Cdk2-associated events at S phase entry	4	90	13.7931	9.65956	0.000708156	1	0.0246084	0.154496	MCM2; CDC6; MCM3; UBE2C;
module 1	G0 and Early G1	2	21	6.89655	20.7431	0.00408263	1	0.113497	0.712555	CDC6; TOP2A;
module 1	Mitotic G1-G1/S phases	8	140	27.5862	12.4044	1.42625e-07	0.000237898	2.64331e-05	0.000165952	MCM2; CDC6; CCNB1; MCM3; UBE2C; TOP2A; CCNE2; RRM2;
module 1	Cell Cycle, Mitotic	21	317	72.4138	14.37	8.77805e-22	1.46418e-18	1.46418e-18	9.19237e-18	CDC20; CCNA2; AURKA; CCNB2; BUB1B; MCM2; CDC6; CCNB1; NEK2; KIF20A; MCM3; PTTG1; UBE2C; NDC80; NUF2; RFC4; TOP2A; CENPF; GMNN; CCNE2; RRM2;
module 1	Extension of Telomeres	1	28	3.44828	7.81829	0.121616	1	1	1	RFC4;
module 1	Telomere C-strand (Lagging Strand) Synthesis	1	22	3.44828	9.94958	0.0968222	1	1	1	RFC4;
module 1	Telomere Maintenance	1	49	3.44828	4.46828	0.203324	1	1	1	RFC4;
module 1	Polymerase switching on the C-strand of the telomere	1	14	3.44828	15.631	0.0627107	1	1	1	RFC4;
module 1	Polymerase switching	1	14	3.44828	15.631	0.0627107	1	1	1	RFC4;
module 1	Lagging Strand Synthesis	1	20	3.44828	10.944	0.0884085	1	1	1	RFC4;
module 1	Removal of licensing factors from origins	5	85	17.2414	12.7782	3.68333e-05	0.0614379	0.00227548	0.0142859	MCM2; CDC6; MCM3; UBE2C; GMNN;
module 1	Chromosome Maintenance	1	69	3.44828	3.17331	0.274286	1	1	1	RFC4;
module 1	Regulation of DNA replication	5	88	17.2414	12.3427	4.3571e-05	0.0726764	0.00259558	0.0162955	MCM2; CDC6; MCM3; UBE2C; GMNN;
module 1	Association of licensing factors with the pre-replicative complex	2	15	6.89655	29.0348	0.00207659	1	0.0666108	0.418194	CDC6; GMNN;
module 1	CDT1 association with the CDC6:ORC:origin complex	3	74	10.3448	8.8182	0.00458577	1	0.125394	0.787249	CDC6; UBE2C; GMNN;
module 1	Activation of the pre-replicative complex	3	30	10.3448	21.7472	0.000329089	0.548921	0.0127656	0.0801448	MCM2; CDC6; MCM3;
module 1	Synthesis of DNA	5	109	17.2414	9.96495	0.000121492	0.202649	0.00537524	0.0337467	MCM2; CDC6; MCM3; UBE2C; RFC4;
module 1	Switching of origins to a post-replicative state	4	83	13.7931	10.4741	0.000520768	0.868641	0.0184817	0.116032	MCM2; CDC6; MCM3; UBE2C;
module 1	Orc1 removal from chromatin	4	83	13.7931	10.4741	0.000520768	0.868641	0.0184817	0.116032	MCM2; CDC6; MCM3; UBE2C;
module 1	CDK-mediated phosphorylation and removal of Cdc6	2	66	6.89655	6.60222	0.0367024	1	0.900287	1	CDC6; UBE2C;
module 1	DNA strand elongation	3	31	10.3448	21.0459	0.000363221	0.605853	0.0137694	0.0864467	MCM2; MCM3; RFC4;
module 1	Unwinding of DNA	2	11	6.89655	39.5833	0.00110025	1	0.0367044	0.230437	MCM2; MCM3;
module 1	Leading Strand Synthesis	1	14	3.44828	15.631	0.0627107	1	1	1	RFC4;
module 1	Adaptive Immune System	1	237	3.44828	0.923971	0.672524	1	1	1	UBE2C;
module 1	Immune System	1	522	3.44828	0.419514	0.919403	1	1	1	UBE2C;
module 1	Signaling by Wnt	1	75	3.44828	2.91948	0.294357	1	1	1	UBE2C;
module 1	Degradation of beta-catenin by the destruction complex	1	75	3.44828	2.91948	0.294357	1	1	1	UBE2C;
module 1	Synthesis and interconversion of nucleotide di- and triphosphates	1	16	3.44828	13.6783	0.0713534	1	1	1	RRM2;
module 1	DNA Repair	2	106	6.89655	4.11105	0.0851132	1	1	1	RFC4; UBE2T;
module 1	Nucleotide Excision Repair	1	49	3.44828	4.46828	0.203324	1	1	1	RFC4;
module 1	Global Genomic NER (GG-NER)	1	33	3.44828	6.63406	0.141774	1	1	1	RFC4;
module 1	Metabolism	2	823	6.89655	0.529535	0.908576	1	1	1	UBE2C; RRM2;
module 1	Metabolism of nucleotides	1	58	3.44828	3.77504	0.236049	1	1	1	RRM2;
module 1	Repair synthesis of patch ~27-30 bases long by DNA polymerase	1	15	3.44828	14.5896	0.0670417	1	1	1	RFC4;
module 1	Fanconi Anemia pathway	1	22	3.44828	9.94958	0.0968222	1	1	1	UBE2T;
module 1	Repair synthesis for gap-filling by DNA polymerase in TC-NER	1	15	3.44828	14.5896	0.0670417	1	1	1	RFC4;
module 1	Gap-filling DNA repair synthesis and ligation in TC-NER	1	16	3.44828	13.6783	0.0713534	1	1	1	RFC4;
module 1	Transcription-coupled NER (TC-NER)	1	44	3.44828	4.97592	0.184563	1	1	1	RFC4;
module 1	Gap-filling DNA repair synthesis and ligation in GG-NER	1	16	3.44828	13.6783	0.0713534	1	1	1	RFC4;
module 1	Stabilization of p53	1	69	3.44828	3.17331	0.274286	1	1	1	UBE2C;
module 1	p53-Dependent G1 DNA Damage Response	1	72	3.44828	3.04111	0.28439	1	1	1	UBE2C;
module 1	p53-Dependent G1/S DNA damage checkpoint	1	72	3.44828	3.04111	0.28439	1	1	1	UBE2C;
module 1	G1/S DNA Damage Checkpoints	1	76	3.44828	2.88107	0.29765	1	1	1	UBE2C;
module 1	Cell Cycle Checkpoints	9	118	31.0345	16.5543	1.5478e-09	2.58174e-06	4.30289e-07	2.70143e-06	CDC20; CCNB2; BUB1B; MCM2; CDC6; CCNB1; MCM3; UBE2C; RFC4;
module 1	Autodegradation of the E3 ubiquitin ligase COP1	1	68	3.44828	3.21997	0.270888	1	1	1	UBE2C;
module 1	G2/M DNA damage checkpoint	4	29	13.7931	29.9709	7.99444e-06	0.0133347	0.000666736	0.00418589	MCM2; CDC6; CCNB1; MCM3;
module 1	G2/M Checkpoints	6	43	20.6897	30.2976	3.00398e-08	5.01063e-05	6.26329e-06	3.9322e-05	CCNB2; MCM2; CDC6; CCNB1; MCM3; RFC4;
module 1	G2/M DNA replication checkpoint	2	4	6.89655	108.681	0.000122457	0.204259	0.00537524	0.0337467	CCNB2; CCNB1;
module 1	Chk1/Chk2(Cds1) mediated inactivation of Cyclin B:Cdk1 complex	1	5	3.44828	43.7106	0.0228481	1	0.577433	1	CCNB1;
module 1	p53-Independent G1/S DNA damage checkpoint	1	70	3.44828	3.12799	0.277669	1	1	1	UBE2C;
module 1	Ubiquitin Mediated Degradation of Phosphorylated Cdc25A	1	69	3.44828	3.17331	0.274286	1	1	1	UBE2C;
module 1	p53-Independent DNA Damage Response	1	70	3.44828	3.12799	0.277669	1	1	1	UBE2C;
module 1	Activation of ATR in response to replication stress	4	37	13.7931	23.4925	2.16708e-05	0.0361469	0.00150612	0.00945569	MCM2; CDC6; MCM3; RFC4;
module 1	Mitotic Spindle Checkpoint	3	19	10.3448	34.3311	8.12692e-05	0.135557	0.00387306	0.0243158	CDC20; BUB1B; UBE2C;
module 1	Regulation of ornithine decarboxylase (ODC)	1	70	3.44828	3.12799	0.277669	1	1	1	UBE2C;
module 1	Regulation of mRNA Stability by Proteins that Bind AU-rich Elements	1	104	3.44828	2.10547	0.384049	1	1	1	UBE2C;
module 1	Destabilization of mRNA by AUF1 (hnRNP D0)	1	71	3.44828	3.08394	0.281037	1	1	1	UBE2C;
module 1	Metabolism of mRNA	1	234	3.44828	0.935816	0.667773	1	1	1	UBE2C;
module 1	Metabolism of RNA	1	281	3.44828	0.779297	0.735101	1	1	1	UBE2C;
module 1	Metabolism of amino acids and derivatives	1	188	3.44828	1.16478	0.58604	1	1	1	UBE2C;
module 1	Class I MHC mediated antigen processing & presentation	1	101	3.44828	2.16801	0.375307	1	1	1	UBE2C;
module 1	Antigen processing: Ubiquitination & Proteasome degradation	1	69	3.44828	3.17331	0.274286	1	1	1	UBE2C;
module 1	Regulation of Apoptosis	1	75	3.44828	2.91948	0.294357	1	1	1	UBE2C;
module 1	Regulation of activated PAK-2p34 by proteasome mediated degradation	1	66	3.44828	3.31753	0.264045	1	1	1	UBE2C;
module 1	Cdc20:Phospho-APC/C mediated degradation of Cyclin A	3	69	10.3448	9.4571	0.00376411	1	0.108251	0.679617	CDC20; BUB1B; UBE2C;
module 1	Apoptosis	1	158	3.44828	1.38593	0.522615	1	1	1	UBE2C;
module 1	Cross-presentation of soluble exogenous antigens (endosomes)	1	67	3.44828	3.26802	0.267474	1	1	1	UBE2C;
module 1	Antigen processing-Cross presentation	1	86	3.44828	2.5461	0.329771	1	1	1	UBE2C;
module 1	ER-Phagosome pathway	1	80	3.44828	2.73704	0.310673	1	1	1	UBE2C;
module 1	guanosine nucleotides de novo biosynthesis	1	14	3.44828	15.631	0.0627107	1	1	1	RRM2;
module 1	pyrimidine deoxyribonucleotides de novo biosynthesis	1	14	3.44828	15.631	0.0627107	1	1	1	RRM2;
module 1	IL2 signaling events mediated by STAT5	1	28	3.44828	7.81829	0.121616	1	1	1	CCNA2;
module 1	Syndecan-1-mediated signaling events	2	1297	6.89655	0.336013	0.989587	1	1	1	CCNA2; CCNB1;
module 1	Regulation of CDC42 activity	2	768	6.89655	0.567457	0.88528	1	1	1	CCNA2; RACGAP1;
module 1	Glypican pathway	2	1335	6.89655	0.326449	0.991387	1	1	1	CCNA2; CCNB1;
module 1	GMCSF-mediated signaling events	2	1289	6.89655	0.338099	0.989166	1	1	1	CCNA2; CCNB1;
module 1	Validated transcriptional targets of deltaNp63 isoforms	2	64	6.89655	6.80851	0.0346903	1	0.863633	1	CCNB2; TOP2A;
module 1	Insulin Pathway	2	1285	6.89655	0.339151	0.988949	1	1	1	CCNA2; CCNB1;
module 1	C-MYC pathway	1	149	3.44828	1.46964	0.501824	1	1	1	CCNB1;
module 1	Nectin adhesion pathway	2	1292	6.89655	0.337314	0.989325	1	1	1	CCNA2; CCNB1;
module 1	Aurora B signaling	5	41	17.2414	26.4881	9.6853e-07	0.00161551	0.00012427	0.000780188	AURKA; RACGAP1; KIF20A; NDC80; NCAPG;
module 1	TRAIL signaling pathway	2	1325	6.89655	0.328913	0.990944	1	1	1	CCNA2; CCNB1;
module 1	IGF1 pathway	2	1288	6.89655	0.338361	0.989112	1	1	1	CCNA2; CCNB1;
module 1	PLK1 signaling events	9	104	31.0345	18.7825	4.95366e-10	8.26271e-07	2.06568e-07	1.29687e-06	CDC20; TPX2; AURKA; BUB1B; CCNB1; KIF20A; DLGAP5; NDC80; PRC1;
module 1	ATF-2 transcription factor network	1	59	3.44828	3.71107	0.239604	1	1	1	CCNA2;
module 1	CDC42 signaling events	2	755	6.89655	0.577227	0.879059	1	1	1	CCNA2; RACGAP1;
module 1	Signaling events mediated by Hepatocyte Growth Factor Receptor (c-Met)	2	1290	6.89655	0.337837	0.989219	1	1	1	CCNA2; CCNB1;
module 1	Glypican 1 network	2	1296	6.89655	0.336272	0.989535	1	1	1	CCNA2; CCNB1;
module 1	Validated targets of C-MYC transcriptional activation	1	81	3.44828	2.70325	0.313892	1	1	1	CCNB1;
module 1	PDGF receptor signaling network	2	1290	6.89655	0.337837	0.989219	1	1	1	CCNA2; CCNB1;
module 1	Integrin family cell surface interactions	2	1375	6.89655	0.316952	0.992964	1	1	1	CCNA2; CCNB1;
module 1	Fanconi anemia pathway	2	48	6.89655	9.07754	0.0203086	1	0.52115	1	RFC4; UBE2T;
module 1	Internalization of ErbB1	2	1285	6.89655	0.339151	0.988949	1	1	1	CCNA2; CCNB1;
module 1	Signaling events mediated by VEGFR1 and VEGFR2	2	1293	6.89655	0.337053	0.989378	1	1	1	CCNA2; CCNB1;
module 1	Beta1 integrin cell surface interactions	2	1348	6.89655	0.323301	0.991933	1	1	1	CCNA2; CCNB1;
module 1	Urokinase-type plasminogen activator (uPA) and uPAR-mediated signaling	2	1285	6.89655	0.339151	0.988949	1	1	1	CCNA2; CCNB1;
module 1	Signaling by Aurora kinases	7	98	24.1379	15.5078	2.11766e-07	0.000353225	3.53225e-05	0.000221761	TPX2; AURKA; RACGAP1; KIF20A; DLGAP5; NDC80; NCAPG;
module 1	Polo-like kinase signaling events in the cell cycle	9	109	31.0345	17.921	7.57616e-10	1.2637e-06	2.52741e-07	1.58675e-06	CDC20; TPX2; AURKA; BUB1B; CCNB1; KIF20A; DLGAP5; NDC80; PRC1;
module 1	IFN-gamma pathway	2	1293	6.89655	0.337053	0.989378	1	1	1	CCNA2; CCNB1;
module 1	Regulation of RAC1 activity	2	205	6.89655	2.12581	0.243625	1	1	1	CCNA2; RACGAP1;
module 1	PAR1-mediated thrombin signaling events	2	1296	6.89655	0.336272	0.989535	1	1	1	CCNA2; CCNB1;
module 1	PDGFR-beta signaling pathway	2	1285	6.89655	0.339151	0.988949	1	1	1	CCNA2; CCNB1;
module 1	p63 transcription factor network	2	105	6.89655	4.1502	0.0837406	1	1	1	CCNB2; TOP2A;
module 1	Integrin-linked kinase signaling	2	654	6.89655	0.66637	0.819825	1	1	1	CCNA2; AURKA;
module 1	EGF receptor (ErbB1) signaling pathway	2	1285	6.89655	0.339151	0.988949	1	1	1	CCNA2; CCNB1;
module 1	Thrombin/protease-activated receptor (PAR) pathway	2	1297	6.89655	0.336013	0.989587	1	1	1	CCNA2; CCNB1;
module 1	Class I PI3K signaling events	2	1285	6.89655	0.339151	0.988949	1	1	1	CCNA2; CCNB1;
module 1	Arf6 signaling events	2	1285	6.89655	0.339151	0.988949	1	1	1	CCNA2; CCNB1;
module 1	Plasma membrane estrogen receptor signaling	2	1298	6.89655	0.335754	0.989639	1	1	1	CCNA2; CCNB1;
module 1	FoxO family signaling	1	49	3.44828	4.46828	0.203324	1	1	1	CCNB1;
module 1	IL2-mediated signaling events	1	115	3.44828	1.9041	0.415103	1	1	1	CCNA2;
module 1	C-MYB transcription factor network	1	84	3.44828	2.60672	0.323462	1	1	1	CCNB1;
module 1	p73 transcription factor network	3	78	10.3448	8.36604	0.00531572	1	0.14301	0.897843	CCNA2; CCNB1; CCNE2;
module 1	FOXM1 transcription factor network	6	42	20.6897	31.0188	2.59297e-08	4.32508e-05	6.17868e-06	3.87909e-05	CCNA2; CCNB2; CCNB1; NEK2; FOXM1; CENPF;
module 1	IL3-mediated signaling events	2	1292	6.89655	0.337314	0.989325	1	1	1	CCNA2; CCNB1;
module 1	AP-1 transcription factor network	1	621	3.44828	0.352636	0.951277	1	1	1	CCNA2;
module 1	mTOR signaling pathway	2	1285	6.89655	0.339151	0.988949	1	1	1	CCNA2; CCNB1;
module 1	RAC1 signaling pathway	2	205	6.89655	2.12581	0.243625	1	1	1	CCNA2; RACGAP1;
module 1	ErbB receptor signaling network	2	1308	6.89655	0.333187	0.990141	1	1	1	CCNA2; CCNB1;
module 1	Signaling events mediated by focal adhesion kinase	2	1285	6.89655	0.339151	0.988949	1	1	1	CCNA2; CCNB1;
module 1	VEGF and VEGFR signaling network	2	1301	6.89655	0.33498	0.989792	1	1	1	CCNA2; CCNB1;
module 1	Alpha9 beta1 integrin signaling events	2	1302	6.89655	0.334723	0.989843	1	1	1	CCNA2; CCNB1;
module 1	Arf6 downstream pathway	2	1285	6.89655	0.339151	0.988949	1	1	1	CCNA2; CCNB1;
module 1	Validated transcriptional targets of AP1 family members Fra1 and Fra2	1	134	3.44828	1.63413	0.465215	1	1	1	CCNA2;
module 1	S1P1 pathway	2	1285	6.89655	0.339151	0.988949	1	1	1	CCNA2; CCNB1;
module 1	ATM pathway	9	307	31.0345	6.3632	5.89232e-06	0.00982839	0.000517284	0.0032476	CCNA2; MCM2; CDC6; CCNB1; MCM3; RFC4; CCNE2; UBE2T; RRM2;
module 1	p53 pathway	2	189	6.89655	2.30576	0.216175	1	1	1	CCNA2; CCNB1;
module 1	ErbB1 downstream signaling	2	1285	6.89655	0.339151	0.988949	1	1	1	CCNA2; CCNB1;
module 1	EGFR-dependent Endothelin signaling events	2	1286	6.89655	0.338887	0.989003	1	1	1	CCNA2; CCNB1;
module 1	ATR signaling pathway	6	250	20.6897	5.2122	0.000815564	1	0.0277624	0.174298	CCNA2; MCM2; CDC6; CCNB1; RFC4; UBE2T;
module 1	Arf6 trafficking events	2	1285	6.89655	0.339151	0.988949	1	1	1	CCNA2; CCNB1;
module 1	Endothelins	2	1304	6.89655	0.334209	0.989943	1	1	1	CCNA2; CCNB1;
module 1	Regulation of retinoblastoma protein	1	66	3.44828	3.31753	0.264045	1	1	1	CCNA2;
module 1	E2F transcription factor network	5	73	17.2414	14.8785	1.75262e-05	0.0292337	0.00127103	0.00797975	CCNA2; CDC6; MCM3; CCNE2; RRM2;
module 1	IL5-mediated signaling events	2	1289	6.89655	0.338099	0.989166	1	1	1	CCNA2; CCNB1;
module 1	Direct p53 effectors	1	138	3.44828	1.58677	0.475224	1	1	1	CCNB1;
module 1	Sphingosine 1-phosphate (S1P) pathway	2	1308	6.89655	0.333187	0.990141	1	1	1	CCNA2; CCNB1;
module 1	Proteoglycan syndecan-mediated signaling events	2	1342	6.89655	0.324746	0.991685	1	1	1	CCNA2; CCNB1;
module 1	Aurora A signaling	3	64	10.3448	10.1958	0.00303984	1	0.0905437	0.568449	TPX2; AURKA; DLGAP5;
module 1	RhoA signaling pathway	2	205	6.89655	2.12581	0.243625	1	1	1	CCNA2; RACGAP1;
module 1	Class I PI3K signaling events mediated by Akt	2	1285	6.89655	0.339151	0.988949	1	1	1	CCNA2; CCNB1;
module 1	LKB1 signaling events	2	1305	6.89655	0.333953	0.989993	1	1	1	CCNA2; CCNB1;
module 1	Regulation of RhoA activity	2	205	6.89655	2.12581	0.243625	1	1	1	CCNA2; RACGAP1;
module 1	Signaling events mediated by PRL	1	23	3.44828	9.51718	0.101001	1	1	1	CCNA2;
module 1	Hedgehog	1	16	3.44828	13.6783	0.0713534	1	1	1	CCNB1;
module 1	TGFBR	1	125	3.44828	1.75178	0.442018	1	1	1	CCNB2;
module 1	ID	1	14	3.44828	15.631	0.0627107	1	1	1	CCNA2;
module 2	Hemostasis	3	375	13.6364	2.2938	0.140188	1	1	1	HRG; KLKB1; F9;
module 2	Dissolution of Fibrin Clot	1	10	4.54545	28.8349	0.034455	1	1	1	HRG;
module 2	Intrinsic Pathway	2	18	9.09091	31.8943	0.0017273	1	0.192076	1	KLKB1; F9;
module 2	Formation of Fibrin Clot (Clotting Cascade)	2	33	9.09091	17.4013	0.0057747	1	0.48161	1	KLKB1; F9;
module 2	Extrinsic Pathway	1	5	4.54545	57.6123	0.0173717	1	0.99917	1	F9;
module 2	Immune System	5	522	22.7273	2.74278	0.0311134	1	1	1	C8B; C8A; MBL2; C9; C6;
module 2	Regulation of Lipid Metabolism by Peroxisome proliferator-activated receptor alpha (PPARalpha)	1	32	4.54545	9.0171	0.106311	1	1	1	CYP4A11;
module 2	Metabolism	13	823	59.0909	4.51756	4.79549e-07	0.000799887	0.00011427	0.000767943	TAT; AGXT; KMO; CYP2C19; CYP2C9; CYP1A2; FTCD; CYP3A4; FMO3; CYP2J2; CYP2E1; CYP2C8; CYP4A11;
module 2	Removal of aminoterminal propeptides from gamma-carboxylated proteins	2	10	9.09091	57.3843	0.000516715	0.861881	0.0718234	0.482686	F9; PROZ;
module 2	Post-translational protein modification	2	114	9.09091	5.0383	0.0594296	1	1	1	F9; PROZ;
module 2	Post-translational modification: gamma carboxylation and hypusine formation	2	14	9.09091	41.0005	0.00103609	1	0.123443	0.829591	F9; PROZ;
module 2	Gamma-carboxylation, transport, and amino-terminal cleavage of proteins	2	12	9.09091	47.8282	0.000754642	1	0.0968264	0.650717	F9; PROZ;
module 2	Gamma-carboxylation of protein precursors	2	9	9.09091	63.7533	0.000414249	0.690968	0.0628153	0.422147	F9; PROZ;
module 2	Transport of gamma-carboxylated protein precursors from the endoplasmic reticulum to the Golgi apparatus	2	8	9.09091	71.7125	0.000322878	0.538561	0.0579375	0.389366	F9; PROZ;
module 2	Metabolism of proteins	2	259	9.09091	2.21774	0.22879	1	1	1	F9; PROZ;
module 2	Aromatic amines can be N-hydroxylated or N-dealkylated by CYP1A2	1	1	4.54545	285.78	0.00349762	1	0.324112	1	CYP1A2;
module 2	Fatty acids	2	3	9.09091	190.836	3.4963e-05	0.0583183	0.00728979	0.0489907	CYP2J2; CYP4A11;
module 2	CYP2E1 reactions	1	1	4.54545	285.78	0.00349762	1	0.324112	1	CYP2E1;
module 2	FMO oxidizes nucleophiles	1	3	4.54545	95.8928	0.0104578	1	0.72682	1	FMO3;
module 2	Phase II conjugation	1	39	4.54545	7.39906	0.128083	1	1	1	CYP1A2;
module 2	Methylation	1	6	4.54545	48.0262	0.0208112	1	1	1	CYP1A2;
module 2	Glyoxylate metabolism	1	5	4.54545	57.6123	0.0173717	1	0.99917	1	AGXT;
module 2	Phenylalanine and tyrosine catabolism	1	9	4.54545	32.0352	0.0310612	1	1	1	TAT;
module 2	Tryptophan catabolism	1	11	4.54545	26.2159	0.0378375	1	1	1	KMO;
module 2	Biological oxidations	9	98	40.9091	26.2715	1.56878e-11	2.61672e-08	6.54179e-09	4.39638e-08	CYP2C19; CYP2C9; CYP1A2; CYP3A4; FMO3; CYP2J2; CYP2E1; CYP2C8; CYP4A11;
module 2	Phase 1 - Functionalization of compounds	9	60	40.9091	42.9074	1.58291e-13	2.6403e-10	2.6403e-10	1.7744e-09	CYP2C19; CYP2C9; CYP1A2; CYP3A4; FMO3; CYP2J2; CYP2E1; CYP2C8; CYP4A11;
module 2	Cytochrome P450 - arranged by substrate type	8	48	36.3636	47.6795	1.84206e-12	3.07255e-09	1.42665e-09	9.5877e-09	CYP2C19; CYP2C9; CYP1A2; CYP3A4; CYP2J2; CYP2E1; CYP2C8; CYP4A11;
module 2	Metabolism of amino acids and derivatives	4	188	18.1818	6.09529	0.003706	1	0.325348	1	TAT; AGXT; KMO; FTCD;
module 2	Histidine catabolism	1	4	4.54545	71.9794	0.0139205	1	0.928778	1	FTCD;
module 2	Xenobiotics	6	14	27.2727	122.594	2.56591e-12	4.27994e-09	1.42665e-09	9.5877e-09	CYP2C19; CYP2C9; CYP1A2; CYP3A4; CYP2E1; CYP2C8;
module 2	Fatty acid, triacylglycerol, and ketone body metabolism	1	83	4.54545	3.47714	0.253774	1	1	1	CYP4A11;
module 2	Metabolism of lipids and lipoproteins	1	257	4.54545	1.12306	0.601216	1	1	1	CYP4A11;
module 2	Innate Immune System	5	183	22.7273	7.82338	0.000347347	0.579375	0.0579375	0.389366	C8B; C8A; MBL2; C9; C6;
module 2	Lectin pathway of complement activation	1	3	4.54545	95.8928	0.0104578	1	0.72682	1	MBL2;
module 2	Complement cascade	5	22	22.7273	65.0503	8.14671e-09	1.35887e-05	2.26479e-06	1.52204e-05	C8B; C8A; MBL2; C9; C6;
module 2	Creation of C4 and C2 activators	1	9	4.54545	32.0352	0.0310612	1	1	1	MBL2;
module 2	Initial triggering of complement	1	15	4.54545	19.2297	0.0512547	1	1	1	MBL2;
module 2	Terminal pathway of complement	4	7	18.1818	163.477	3.90227e-09	6.50898e-06	1.3018e-06	8.74866e-06	C8B; C8A; C9; C6;
module 2	4-hydroxybenzoate biosynthesis	1	1	4.54545	285.78	0.00349762	1	0.324112	1	TAT;
module 2	glycine biosynthesis III	1	2	4.54545	143.601	0.00698355	1	0.554694	1	AGXT;
module 2	NAD biosynthesis II (from tryptophan)	1	10	4.54545	28.8349	0.034455	1	1	1	KMO;
module 2	oxidative ethanol degradation III (microsomal)	1	6	4.54545	48.0262	0.0208112	1	1	1	CYP2E1;
module 2	methylglyoxal degradation III	1	3	4.54545	95.8928	0.0104578	1	0.72682	1	CYP2E1;
module 2	histidine degradation III	1	7	4.54545	41.1751	0.0242393	1	1	1	FTCD;
module 2	tryptophan degradation to 2-amino-3-carboxymuconate semialdehyde	1	5	4.54545	57.6123	0.0173717	1	0.99917	1	KMO;
module 2	tryptophan degradation XI (mammalian, via kynurenine)	1	8	4.54545	36.0346	0.027656	1	1	1	KMO;
module 2	tryptophan degradation III (eukaryotic)	1	9	4.54545	32.0352	0.0310612	1	1	1	KMO;
module 2	tyrosine degradation I	1	5	4.54545	57.6123	0.0173717	1	0.99917	1	TAT;
module 2	acetone degradation I (to methylglyoxal)	1	7	4.54545	41.1751	0.0242393	1	1	1	CYP2E1;
module 2	nicotine degradation II	1	11	4.54545	26.2159	0.0378375	1	1	1	FMO3;
module 2	FOXA transcription factor networks	1	81	4.54545	3.56299	0.248457	1	1	1	TAT;
module 2	FOXA2 and FOXA3 transcription factor networks	1	43	4.54545	6.71094	0.140296	1	1	1	TAT;
module 3	Developmental Biology	1	432	10	1.46908	0.509366	1	1	1	LAMC1;
module 3	Axon guidance	1	219	10	2.89784	0.298571	1	1	1	LAMC1;
module 3	L1CAM interactions	1	79	10	8.03261	0.118811	1	1	1	LAMC1;
module 3	Hemostasis	1	375	10	1.69237	0.45944	1	1	1	PLG;
module 3	Dissolution of Fibrin Clot	1	10	10	63.4022	0.0157962	1	0.506694	1	PLG;
module 3	Signal Transduction	2	1208	20	1.04555	0.599893	1	1	1	SPP1; LAMC1;
module 3	Regulation of Insulin-like Growth Factor (IGF) Activity by Insulin-like Growth Factor Binding Proteins (IGFBPs)	1	14	10	45.3002	0.0220516	1	0.668764	1	PLG;
module 3	Diabetes pathways	1	216	10	2.93809	0.295095	1	1	1	PLG;
module 3	Immune System	1	522	10	1.21579	0.579792	1	1	1	CRP;
module 3	Integrin cell surface interactions	2	72	20	17.5396	0.0054798	1	0.300333	1	SPP1; LAMC1;
module 3	Lipoprotein metabolism	3	27	30	70.026	8.29849e-06	0.0138419	0.0138419	0.0899465	LCAT; CETP; APOA5;
module 3	LDL-mediated lipid transport	1	4	10	158.268	0.00634566	1	0.300333	1	CETP;
module 3	HDL-mediated lipid transport	2	15	20	84.1458	0.00023627	0.394098	0.0985246	0.640226	LCAT; CETP;
module 3	Chylomicron-mediated lipid transport	1	16	10	39.6412	0.0251658	1	0.714547	1	APOA5;
module 3	Lipid digestion, mobilization, and transport	3	46	30	41.1085	4.23872e-05	0.0707019	0.0235673	0.153144	LCAT; CETP; APOA5;
module 3	Metabolism of lipids and lipoproteins	3	257	30	7.35925	0.00653393	1	0.300333	1	LCAT; CETP; APOA5;
module 3	Innate Immune System	1	183	10	3.46788	0.255817	1	1	1	CRP;
module 3	Classical antibody-mediated complement activation	1	6	10	105.6	0.00950488	1	0.337322	1	CRP;
module 3	Complement cascade	1	22	10	28.8349	0.034455	1	0.927743	1	CRP;
module 3	Creation of C4 and C2 activators	1	9	10	70.4391	0.0142268	1	0.474605	1	CRP;
module 3	Initial triggering of complement	1	15	10	42.2822	0.0236098	1	0.69814	1	CRP;
module 3	Wnt signaling network	1	200	10	3.17312	0.27629	1	1	1	CYR61;
module 3	Beta2 integrin cell surface interactions	1	28	10	22.6582	0.0436645	1	1	1	CYR61;
module 3	Osteopontin-mediated events	1	29	10	21.8772	0.0451917	1	1	1	SPP1;
module 3	Regulation of cytoplasmic and nuclear SMAD2/3 signaling	1	305	10	2.08077	0.391898	1	1	1	LAMC1;
module 3	IL6-mediated signaling events	1	47	10	13.5005	0.0723087	1	1	1	CRP;
module 3	Integrins in angiogenesis	1	64	10	9.91496	0.0972807	1	1	1	SPP1;
module 3	Syndecan-1-mediated signaling events	6	1297	60	2.91171	0.00741207	1	0.300333	1	PLG; AFP; SPP1; CYR61; LAMC1; CRP;
module 3	Regulation of CDC42 activity	4	768	40	3.28091	0.0252748	1	0.714547	1	AFP; CYR61; LAMC1; CRP;
module 3	Glypican pathway	7	1335	70	3.29952	0.00124797	1	0.300333	1	PLG; AFP; GPC3; SPP1; CYR61; LAMC1; CRP;
module 3	GMCSF-mediated signaling events	6	1289	60	2.92978	0.00717873	1	0.300333	1	PLG; AFP; SPP1; CYR61; LAMC1; CRP;
module 3	Insulin Pathway	6	1285	60	2.9389	0.00706419	1	0.300333	1	PLG; AFP; SPP1; CYR61; LAMC1; CRP;
module 3	Stabilization and expansion of the E-cadherin adherens junction	2	275	20	4.59267	0.0679739	1	1	1	SPP1; CYR61;
module 3	FOXA transcription factor networks	1	81	10	7.8343	0.121646	1	1	1	AFP;
module 3	Glypican 3 network	2	206	20	6.13091	0.0403971	1	1	1	GPC3; CYR61;
module 3	Nectin adhesion pathway	6	1292	60	2.92298	0.00726556	1	0.300333	1	PLG; AFP; SPP1; CYR61; LAMC1; CRP;
module 3	FGF signaling pathway	1	48	10	13.2193	0.0737947	1	1	1	SPP1;
module 3	TRAIL signaling pathway	6	1325	60	2.85018	0.00827496	1	0.313696	1	PLG; AFP; SPP1; CYR61; LAMC1; CRP;
module 3	IGF1 pathway	6	1288	60	2.93206	0.00714996	1	0.300333	1	PLG; AFP; SPP1; CYR61; LAMC1; CRP;
module 3	CDC42 signaling events	4	755	40	3.33741	0.0238573	1	0.69814	1	AFP; CYR61; LAMC1; CRP;
module 3	Signaling events mediated by Hepatocyte Growth Factor Receptor (c-Met)	6	1290	60	2.92751	0.00720758	1	0.300333	1	PLG; AFP; SPP1; CYR61; LAMC1; CRP;
module 3	Glypican 1 network	6	1296	60	2.91396	0.00738259	1	0.300333	1	PLG; AFP; SPP1; CYR61; LAMC1; CRP;
module 3	N-cadherin signaling events	2	251	20	5.03179	0.0577739	1	1	1	SPP1; CYR61;
module 3	PDGF receptor signaling network	6	1290	60	2.92751	0.00720758	1	0.300333	1	PLG; AFP; SPP1; CYR61; LAMC1; CRP;
module 3	Integrin family cell surface interactions	6	1375	60	2.74654	0.0100049	1	0.347671	1	PLG; AFP; SPP1; CYR61; LAMC1; CRP;
module 3	Internalization of ErbB1	6	1285	60	2.9389	0.00706419	1	0.300333	1	PLG; AFP; SPP1; CYR61; LAMC1; CRP;
module 3	TGF-beta receptor signaling	1	305	10	2.08077	0.391898	1	1	1	LAMC1;
module 3	FOXA2 and FOXA3 transcription factor networks	1	43	10	14.756	0.0663433	1	1	1	AFP;
module 3	Posttranslational regulation of adherens junction stability and dissassembly	2	231	20	5.46742	0.0497554	1	1	1	SPP1; CYR61;
module 3	Signaling events mediated by VEGFR1 and VEGFR2	6	1293	60	2.92072	0.00729468	1	0.300333	1	PLG; AFP; SPP1; CYR61; LAMC1; CRP;
module 3	Beta1 integrin cell surface interactions	6	1348	60	2.80155	0.00903964	1	0.327785	1	PLG; AFP; SPP1; CYR61; LAMC1; CRP;
module 3	Urokinase-type plasminogen activator (uPA) and uPAR-mediated signaling	6	1285	60	2.9389	0.00706419	1	0.300333	1	PLG; AFP; SPP1; CYR61; LAMC1; CRP;
module 3	IFN-gamma pathway	6	1293	60	2.92072	0.00729468	1	0.300333	1	PLG; AFP; SPP1; CYR61; LAMC1; CRP;
module 3	Regulation of RAC1 activity	1	205	10	3.09573	0.282215	1	1	1	CYR61;
module 3	PAR1-mediated thrombin signaling events	6	1296	60	2.91396	0.00738259	1	0.300333	1	PLG; AFP; SPP1; CYR61; LAMC1; CRP;
module 3	Beta3 integrin cell surface interactions	3	43	30	43.9759	3.45466e-05	0.0576237	0.0235673	0.153144	SPP1; CYR61; LAMC1;
module 3	Noncanonical Wnt signaling pathway	1	182	10	3.48693	0.254597	1	1	1	CYR61;
module 3	Alpha4 beta1 integrin signaling events	1	33	10	19.2262	0.0512786	1	1	1	SPP1;
module 3	PDGFR-beta signaling pathway	6	1285	60	2.9389	0.00706419	1	0.300333	1	PLG; AFP; SPP1; CYR61; LAMC1; CRP;
module 3	Canonical Wnt signaling pathway	1	155	10	4.09429	0.220958	1	1	1	CYR61;
module 3	E-cadherin signaling in the nascent adherens junction	2	275	20	4.59267	0.0679739	1	1	1	SPP1; CYR61;
module 3	Integrin-linked kinase signaling	4	654	40	3.85281	0.0145727	1	0.476613	1	AFP; CYR61; LAMC1; CRP;
module 3	Regulation of nuclear beta catenin signaling and target gene transcription	1	135	10	4.70081	0.195167	1	1	1	CYR61;
module 3	EGF receptor (ErbB1) signaling pathway	6	1285	60	2.9389	0.00706419	1	0.300333	1	PLG; AFP; SPP1; CYR61; LAMC1; CRP;
module 3	p75(NTR)-mediated signaling	1	178	10	3.56528	0.249697	1	1	1	PLG;
module 3	Thrombin/protease-activated receptor (PAR) pathway	6	1297	60	2.91171	0.00741207	1	0.300333	1	PLG; AFP; SPP1; CYR61; LAMC1; CRP;
module 3	Class I PI3K signaling events	6	1285	60	2.9389	0.00706419	1	0.300333	1	PLG; AFP; SPP1; CYR61; LAMC1; CRP;
module 3	Arf6 signaling events	6	1285	60	2.9389	0.00706419	1	0.300333	1	PLG; AFP; SPP1; CYR61; LAMC1; CRP;
module 3	Plasma membrane estrogen receptor signaling	6	1298	60	2.90947	0.00744165	1	0.300333	1	PLG; AFP; SPP1; CYR61; LAMC1; CRP;
module 3	p73 transcription factor network	1	78	10	8.13558	0.11739	1	1	1	AFP;
module 3	IL3-mediated signaling events	6	1292	60	2.92298	0.00726556	1	0.300333	1	PLG; AFP; SPP1; CYR61; LAMC1; CRP;
module 3	AP-1 transcription factor network	4	621	40	4.05754	0.0121631	1	0.414043	1	AFP; CYR61; LAMC1; CRP;
module 3	amb2 Integrin signaling	1	40	10	15.8624	0.0618467	1	1	1	PLG;
module 3	Glucocorticoid receptor signaling	1	85	10	7.46567	0.127292	1	1	1	AFP;
module 3	mTOR signaling pathway	6	1285	60	2.9389	0.00706419	1	0.300333	1	PLG; AFP; SPP1; CYR61; LAMC1; CRP;
module 3	RAC1 signaling pathway	1	205	10	3.09573	0.282215	1	1	1	CYR61;
module 3	ErbB receptor signaling network	6	1308	60	2.88723	0.00774239	1	0.300333	1	PLG; AFP; SPP1; CYR61; LAMC1; CRP;
module 3	Signaling events mediated by focal adhesion kinase	6	1285	60	2.9389	0.00706419	1	0.300333	1	PLG; AFP; SPP1; CYR61; LAMC1; CRP;
module 3	VEGF and VEGFR signaling network	6	1301	60	2.90276	0.00753091	1	0.300333	1	PLG; AFP; SPP1; CYR61; LAMC1; CRP;
module 3	Glucocorticoid receptor regulatory network	1	80	10	7.93221	0.120229	1	1	1	AFP;
module 3	Alpha9 beta1 integrin signaling events	6	1302	60	2.90053	0.00756084	1	0.300333	1	PLG; AFP; SPP1; CYR61; LAMC1; CRP;
module 3	Syndecan-2-mediated signaling events	1	77	10	8.24122	0.115967	1	1	1	SPP1;
module 3	ALK1 pathway	1	324	10	1.95876	0.410943	1	1	1	LAMC1;
module 3	Arf6 downstream pathway	6	1285	60	2.9389	0.00706419	1	0.300333	1	PLG; AFP; SPP1; CYR61; LAMC1; CRP;
module 3	S1P1 pathway	6	1285	60	2.9389	0.00706419	1	0.300333	1	PLG; AFP; SPP1; CYR61; LAMC1; CRP;
module 3	ATM pathway	2	307	20	4.11397	0.082472	1	1	1	AFP; SPP1;
module 3	p53 pathway	2	189	20	6.68234	0.0344844	1	0.927743	1	AFP; SPP1;
module 3	ErbB1 downstream signaling	6	1285	60	2.9389	0.00706419	1	0.300333	1	PLG; AFP; SPP1; CYR61; LAMC1; CRP;
module 3	EGFR-dependent Endothelin signaling events	6	1286	60	2.93662	0.00709269	1	0.300333	1	PLG; AFP; SPP1; CYR61; LAMC1; CRP;
module 3	Syndecan-4-mediated signaling events	2	209	20	6.04291	0.0414793	1	1	1	PLG; CYR61;
module 3	Alpha6 beta4 integrin-ligand interactions	1	11	10	57.6436	0.0173634	1	0.546456	1	LAMC1;
module 3	ATR signaling pathway	2	250	20	5.05191	0.0573623	1	1	1	AFP; SPP1;
module 3	Regulation of nuclear SMAD2/3 signaling	1	305	10	2.08077	0.391898	1	1	1	LAMC1;
module 3	ALK1 signaling events	1	321	10	1.97706	0.407972	1	1	1	LAMC1;
module 3	Angiopoietin receptor Tie2-mediated signaling	1	50	10	12.6906	0.0767602	1	1	1	PLG;
module 3	Arf6 trafficking events	6	1285	60	2.9389	0.00706419	1	0.300333	1	PLG; AFP; SPP1; CYR61; LAMC1; CRP;
module 3	E-cadherin signaling events	2	280	20	4.51066	0.0701738	1	1	1	SPP1; CYR61;
module 3	Endothelins	6	1304	60	2.89608	0.00762099	1	0.300333	1	PLG; AFP; SPP1; CYR61; LAMC1; CRP;
module 3	Beta5 beta6 beta7 and beta8 integrin cell surface interactions	1	17	10	37.3108	0.0267196	1	0.742804	1	CYR61;
module 3	IL5-mediated signaling events	6	1289	60	2.92978	0.00717873	1	0.300333	1	PLG; AFP; SPP1; CYR61; LAMC1; CRP;
module 3	Direct p53 effectors	2	138	20	9.15172	0.0191613	1	0.591871	1	AFP; SPP1;
module 3	Sphingosine 1-phosphate (S1P) pathway	6	1308	60	2.88723	0.00774239	1	0.300333	1	PLG; AFP; SPP1; CYR61; LAMC1; CRP;
module 3	Proteoglycan syndecan-mediated signaling events	6	1342	60	2.81408	0.00883515	1	0.32749	1	PLG; AFP; SPP1; CYR61; LAMC1; CRP;
module 3	RhoA signaling pathway	1	205	10	3.09573	0.282215	1	1	1	CYR61;
module 3	Class I PI3K signaling events mediated by Akt	6	1285	60	2.9389	0.00706419	1	0.300333	1	PLG; AFP; SPP1; CYR61; LAMC1; CRP;
module 3	LKB1 signaling events	6	1305	60	2.89386	0.0076512	1	0.300333	1	PLG; AFP; SPP1; CYR61; LAMC1; CRP;
module 3	Regulation of RhoA activity	1	205	10	3.09573	0.282215	1	1	1	CYR61;
