# Supplementary material for: Based on Integrated Bioinformatics Analysis Identification of Biomarkers in Hepatocellular Carcinoma Patients from Different Regions
Source: Biomed Res Int. 2019 Oct 28;2019:1742341. doi: 10.1155/2019/1742341 (PMC6925735; doi:10.1155/2019/1742341)
Supplement: Supplementary Materials — Supplementary Table S1: information for the DEGs. Supplementary Table S2: enrichment analysis of the DEGs. Supplementary Table S3: node information for PPI network. Supplementary Table S4: pathway analysis of network modules. Supplementary Table S5: univariate Cox regression analysis of the prognosis of the top 20 genes in PPI. [file 1742341.f1.zip › 1742341.f1/Supplementary Table S5.xlsx]

## Sheet: Sheet1
Supplementary Table S5 Univariate Cox regression analysis of the prognosis of the top 20 genes in PPI
Gene	Coef	Exp(coef)	Se(coef)	Z	Pr(>|z|)
CDC20	0.260071	1.29702	0.0538111	4.83303	1.34469e-06
TPX2	0.328228	1.38851	0.0694393	4.72684	2.28042e-06
DLGAP5	0.255055	1.29053	0.0564642	4.5171	6.2691e-06
CCNB1	0.306235	1.3583	0.070269	4.35804	1.31232e-05
TTK	0.235105	1.26504	0.0541212	4.34405	1.3988e-05
NDC80	0.283583	1.32788	0.0663146	4.27633	1.90001e-05
PBK	0.253306	1.28828	0.0593964	4.26467	2.00198e-05
HMMR	0.264189	1.30238	0.0625593	4.22302	2.41053e-05
PTTG1	0.231034	1.2599	0.0577677	3.99937	6.35114e-05
CCNA2	0.22068	1.24692	0.0560417	3.93777	8.22412e-05
MKI67	0.237493	1.26807	0.0612329	3.87852	0.000105094
UBE2C	0.213718	1.23827	0.0557636	3.83258	0.000126808
BUB1B	0.20954	1.23311	0.0554793	3.7769	0.00015879
FOXM1	0.215691	1.24072	0.0588478	3.66524	0.000247111
TOP2A	0.193238	1.21317	0.0541165	3.57078	0.000355923
CDC6	0.217759	1.24329	0.0613894	3.54718	0.000389378
CCNB2	0.186174	1.20463	0.0582417	3.19658	0.00139068
CDKN3	0.172426	1.18818	0.0569304	3.0287	0.00245604
AURKA	0.196889	1.21761	0.0728296	2.70342	0.006863
NUSAP1	0.155941	1.16876	0.0705629	2.20995	0.0271083
